# Supplementary material
Source: publisher figshare collection journal article supplement (https://acs.figshare.com/ndownloader/files/13889798)
Supplement: Supplementary file 1 [file 13889798]

## Sheet: THZ1,THZ1-DTB Comparison
Supplementary Table S4. THZ1/THZ1-DTB Reactivity Comparisons.
Quantitative comparison of compound reactivity differences for enriched cysteine peptides.
Cysteine sites also detected as THZ1-DTB modified in CITe-Id experiments are noted.
GeneName	Cysteine Site	# PSM(s)	# Peptide(s)	Peptide(s)	Reactivity Difference (log2 THZ1/THZ1-DTB)	Modified in CITe-Id? (THZ1-DTB)
ABCF3'	C102	3	1	ITENYDCGTKLPGLLKR'	0.434288	-
ABL2'	C999	2	1	LLQHPSICSDPTEEPTALTAGQSTSETQEGGKK'	-0.555944	-
ACAA1'	C177	5	2	ARDCLIPMGITSENVAER', 'DCLIPMGITSENVAER'	0.0590315	-
ACAD9'	C613	2	1	AYICAHPLDR'	-0.0448118	-
ACAT1'	C119	10	2	QAVLGAGLPISTPCTTINKVCASGMK', 'QAVLGAGLPISTPCTTINK'	0.0615848	-
ACAT1'	C196	12	1	DGLTDVYNKIHMGSCAENTAK'	0.0775459	-
ACBD3'	C487	2	1	DCHEEVYAGSHQYPGR'	0.137189	-
ACIN1'	C546	3	1	GITEECLKQPSLEQK'	0.0447792	-
ACIN1'	C691	5	1	DSSTSYTETKDPSSGQEVATPPVPQLQVCEPK'	0.820583	-
ACLY'	C633	1	1	GVTIIGPATVGGIKPGCFK'	-0.175637	Yes
ACO1'	C392	1	1	DFESCLGAK'	0.170318	-
ACO2'	C126	6	1	VAVPSTIHCDHLIEAQVGGEK'	0.0980115	-
ACO2'	C448	1	1	DLGGIVLANACGPCIGQWDRK'	0.170259	-
ACP1'	C63	7	2	VDSAATSGYEIGNPPDYRGQSCMK', 'VDSAATSGYEIGNPPDYRGQSCMKR'	0.0949971	-
ACP2'	C159	1	1	LLKFPLGPCPR'	0.511754	-
ACTN1'	C480	1	1	ICDQWDNLGALTQK'	0.150281	-
ACTN4'	C499	6	2	ICDQWDALGSLTHSR', 'ICDQWDALGSLTHSRR'	0.26133	-
ACTN4', 'ACTN1'	C879	11	2	RELPPDQAEYCIAR', 'ELPPDQAEYCIAR'	0.0790722	-
ACTR1A', 'ACTR1B'	C34	4	1	YCFPNYVGRPK'	0.218673	-
ACTR2'	C11	7	2	KVVVCDNGTGFVK', 'VVVCDNGTGFVK'	0.38017	-
ADAM19'	C200	1	1	MKREDLNSMK'	0.0566111	-
ADAT2'	C15	1	1	AAPKPAASGACSVSAEETEK'	-0.0223892	-
ADK', 'unresolved: gi|320461537|ref|NP_001189378.1|', 'unresolved: gi|320461539|ref|NP_001189379.1|'	C143	1	1	SLIANLAAANCYKK'	-0.794404	-
ADK', 'unresolved: gi|320461537|ref|NP_001189378.1|', 'unresolved: gi|320461539|ref|NP_001189379.1|'	C336	2	1	TGCTFPEKPDFH'	0.0802627	-
ADRM1'	C80	1	1	DRTSGNVEDDLIIFPDDCEFK'	0.0298203	-
AFAP1'	C684	3	1	TLENSPISSCDTSDTEGPVPVNSAAVLKK'	-0.190888	-
AHNAK'	C2806	27	2	ADIDVSGPKVDVECPDVNIEGPEGK', 'VDVECPDVNIEGPEGK'	-0.425953	-
AHNAK'	C5502	11	2	SSGCDVNLPGVNVK', 'SSGCDVNLPGVNVKLPTGQISGPEIK'	0.0982767	-
AHNAK'	C1900	3	1	LEGDLTGPSVGVEVPDVELECPDAK'	0.351271	-
AIFM1'	C256	3	1	CLIATGGTPR'	0.0928525	-
AIMP1'	C284	6	2	IWEQIQPDLHTNDECVATYK', 'KKIWEQIQPDLHTNDECVATYK'	0.061316	-
AIMP1'	C161	1	1	IGCIITAR'	0.136081	-
AIMP2'	C23	2	1	VELPTCMYR'	0.274536	-
AK2', 'unresolved: gi|312836806|ref|NP_001186128.1|'	C40	2	1	LAENFCVCHLATGDMLR'	-0.0140804	-
AK2', 'unresolved: gi|312836806|ref|NP_001186128.1|'	C92	9	1	NLETPLCK'	0.00393854	-
AK4', 'LOC100507855'	C22	5	1	AVILGPPGSGKGTVCQR'	0.0815556	-
AKAP1', 'unresolved: gi|339275974|ref|NP_001229831.1|', 'unresolved: gi|339275976|ref|NP_001229832.1|'	C64	5	1	ADPAIKEPLPVEDVCPK'	-0.566454	-
AKAP1', 'unresolved: gi|339275974|ref|NP_001229831.1|', 'unresolved: gi|339275976|ref|NP_001229832.1|'	C147	3	1	SIPLECPLSSPK'	-0.032186	-
AKAP12'	C470	1	1	LKETCVSGEDPTQGADLSPDEK'	0.222465	-
AKAP13'	C536	1	1	ISVPNCAPAASSLDGNKPAESSLAFSNEETSTEK'	-1.28618	-
ALDH6A1'	C368	1	1	ERVCNLIDSGTK'	-0.124961	-
ALDH7A1', 'unresolved: gi|319655561|ref|NP_001188306.1|', 'unresolved: gi|320202964|ref|NP_001189333.1|'	C70	8	1	GEVITTYCPANNEPIAR'	0.0700851	-
ALDOA'	C240	1	1	ALSDHHIYLEGTLLKPNMVTPGHACTQK'	-1.05426	-
ALDOA', 'ALDOC'	C178	3	1	YASICQQNGIVPIVEPEILPDGDHDLKR'	-0.0429726	-
ALPI'	C120	2	2	QVPDSAATATAYLCGVK', 'TYNVDRQVPDSAATATAYLCGVK'	0.0759286	-
ANAPC7'	C131	3	1	VRPSTGNSASTPQSQCLPSEIEVK'	0.172631	-
ANKHD1-EIF4EBP3', 'ANKHD1'	C213	3	1	SLAEACSDGDVNAVRK'	0.19124	-
ANKHD1-EIF4EBP3', 'ANKRD17', 'ANKHD1'	C1130	1	1	TKDTPLSLACSGGR'	0.0660297	-
ANKRD40'	C209	4	1	TPESTKPGPVCQPPVSQSR'	0.1246	-
ANKRD57'	C183	1	1	TPAPGPSEDLELPPHGCEEADR'	0.135718	-
ANLN'	C234	3	1	QNSVQEQPGTACLSK'	0.123749	-
ANXA11'	C226	3	1	GFGTDEQAIIDCLGSR'	0.119445	-
ANXA11'	C384	3	2	LGTDESKFNAVLCSR', 'FNAVLCSR'	0.130063	-
ANXA2'	C133	13	2	ASMKGLGTDEDSLIEIICSR', 'GLGTDEDSLIEIICSR'	0.14122	Yes
ANXA7'	C391	1	1	TILQCALNRPAFFAER'	0.0850878	-
ANXA7'	C305	15	2	LLVSMCQGNRDENQSINHQMAQEDAQR', 'LLVSMCQGNR'	0.133935	-
AP1B1'	C859	5	2	DCPLNAEAASSKLQSSNIFTVAK', 'DCPLNAEAASSKLQSSNIFTVAKR'	0.0443642	-
AP1B1'	C914	2	1	IQPGNPSCTLSLK'	0.132354	-
AP2B1'	C857	1	1	ECHLNADTVSSKLQNNNVYTIAKR'	0.618296	-
APC'	C1080	1	1	FQPHFGQQECVSPYR'	0.125051	-
APEH'	C30	2	1	GLSRQPALSAACLGPEVTTQYGGQYR'	-0.10031	-
APEX1'	C65	3	1	ICSWNVDGLR'	0.113147	-
APEX1'	C93	3	1	EEAPDILCLQETK'	0.123737	-
APEX1'	C99	4	1	CSENKLPAELQELPGLSHQYWSAPSDK'	0.208323	-
ARAF'	C192	3	1	TQHCDPEHFPFPAPANAPLQR'	0.0329975	-
ARFGAP1'	C351	9	3	KSPSSDSWTCADTSTER', 'SPSSDSWTCADTSTERR', 'KSPSSDSWTCADTSTERR'	0.163192	-
ARHGEF1'	C911	1	1	LRPLLSQLGGNSVPQPGCT'	0.0177082	-
ARHGEF5'	C882	2	1	TRPACQDWTVPLPASAGR'	0.130959	-
ARHGEF5', 'ARHGEF35'	C98	1	1	EGSADVEPNQESLVAEACDTPEHWEAVPQSLAGR'	0.159197	-
ARID2'	C711	2	1	APIPCEVVK'	-0.28322	-
ARL6IP1'	C109	4	1	FHEICSNLVK'	0.11772	-
ASPH'	C648	1	1	TCTLLEKFPETTGCR'	0.241757	-
ATF7IP'	C297	1	1	SVPVCEPVPEIDNIEPSSNKDDDFLEK'	0.627225	-
ATG9A'	C764	2	1	SASYPCAAPRPGAPETTALHGGFQR'	0.0818928	-
ATL2'	C402	5	1	SMEQVCGGDKPYIAPSDLER'	0.307124	-
ATL3'	C371	11	1	DIYYNNMEEVCGGEKPYLSPDILEEK'	0.10994	-
ATOX1'	C41	12	2	VCIESEHSMDTLLATLK', 'VCIESEHSMDTLLATLKK'	0.190201	-
ATP1A1'	C211	5	1	IISANGCKVDNSSLTGESEPQTR'	-0.0724475	-
ATP1A1', 'ATP1A4', 'ATP1A3', 'ATP12A', 'ATP1A2'	C705	2	1	LIIVEGCQR'	0.0284649	-
ATP1B1'	C213	4	1	YNPNVLPVQCTGKR'	0.090241	-
ATP1B3'	C191	8	1	IDCVSKNEDIPNVAVYPHNGMIDLK'	-0.281168	-
ATP2A2'	C997	1	1	NYLEPGKECVQPATK'	0.111933	-
ATP5H'	C101	4	1	SCAEWVSLSK'	0.17984	-
ATP6V1A'	C138	1	1	WDFTPCK'	-2.01008	-
ATXN2'	C892	5	1	RGPEVTSQGVQTSSPACK'	-0.558139	-
ATXN2'	C556	2	1	VVNGGVPWPSPCPSPSSRPPSR'	0.0561383	-
ATXN2'	C852	3	1	DSFIENSSSNCTSGSSKPNSPSISPSILSNTEHK'	0.166609	-
ATXN2L'	C628	7	2	TESVSDKEDKPPLAPSGGTEGPEQPPPPCPSQTGSPPVGLIKGEDK', 'TESVSDKEDKPPLAPSGGTEGPEQPPPPCPSQTGSPPVGLIK'	-0.210561	-
AZI1'	C218	3	1	AATCEGSESSGFGKLPK'	-0.209266	-
B2M'	C45	4	1	SNFLNCYVSGFHPSDIEVDLLK'	-0.145156	-
B3GALT6'	C300	1	1	EGRLCK'	-0.00990199	-
BAG3'	C373	3	1	VEVKVPPAPVPCPPPSPGPSAVPSSPK'	0.0890223	-
BAG3'	C179	7	1	SQSPAASDCSSSSSSASLPSSGR'	0.121035	-
BAG3'	C151	15	2	QCGQVAAAAAAQPPASHGPER', 'GMPETTQPDKQCGQVAAAAAAQPPASHGPER'	0.152925	-
BANF1'	C77	2	1	DCFGCLR'	0.161261	-
BANF1'	C67	7	1	EWLKDTCGANAK'	0.48204	-
BAT1'	C165	6	1	NCPHIVVGTPGR'	0.105932	-
BCL9L'	C68	6	1	TGNGGAQSQHQNVNQGPTCNVGSK'	0.139357	-
BCLAF1', 'LOC731605'	C242	10	1	SPHSPSPIATPPSQSSSCSDAPMLSTVHSAK'	0.322028	-
BET1'	C28	5	1	RAGLGEGVPPGNYGNYGYANSGYSACEEENER'	0.0414703	-
BIRC6'	C613	2	1	TQGESISEQGSTDNESCTNSELNSPLVRR'	0.167787	-
BOD1L'	C2438	2	1	ECPEIGPFAGR'	-0.00594506	-
BOD1L', 'BOD1'	C74	1	1	DCLADVDTKPAYQNLR'	-0.221033	-
BOLA1'	C126	5	1	ENSQLDTSPPCLGGNKK'	-0.560098	-
BOLA2', 'BOLA2B'	C125	1	1	LVNACLAEELPHIHAFEQK'	0.124434	-
BOP1'	C108	1	1	TTEEQVQASTPCPR'	-0.0808076	-
BRD7'	C338	3	1	RLVNSQCEFER'	0.167793	-
BSG'	C242	29	1	SSEHINEGETAMLVCK'	0.119651	-
BTF3'	C22	11	2	GGCPGGEATLSQPPPR', 'GGCPGGEATLSQPPPRGGTR'	0.121093	-
C10orf46'	C362	1	1	KRAGDELAYNSSSACASSR'	-0.00353005	-
C12orf45'	C13	2	1	ASPSCSSPTRDSSGVPVSK'	0.104721	-
C12orf57'	C73	4	1	AYGFSCDGEGVLK'	0.0786554	-
C14orf156'	C48	12	3	CILPFDK', 'CILPFDKETGFHR', 'RCILPFDK'	0.383219	-
C14orf166'	C69	6	3	DVNCPFKIQDR', 'YLRDVNCPFK', 'YLRDVNCPFKIQDR'	0.104256	-
C15orf23'	C217	5	2	DNCLAILESK', 'FRDNCLAILESK'	0.293046	-
C16orf61'	C37	7	3	FFGYCNDVDR', 'FFGYCNDVDRELRK', 'FFGYCNDVDRELR'	0.194138	-
C16orf88'	C78	2	2	GVSTLCEEHVEPETTLPARR', 'GVSTLCEEHVEPETTLPAR'	0.123967	-
C16orf88'	C172	3	1	KGAQDPTAFSVQDPWFCEAR'	0.24786	-
C17orf49'	C66	2	1	FGDDLNHISCVIK'	0.0015627	-
C17orf56'	C493	1	1	LVGAGAAAGESCPDAPRAPQTSSQR'	0.102301	-
C17orf59'	C176	3	1	SLDGLSEACGGAGSSGSAESGAGGGRR'	0.12597	-
C17orf80'	C228	1	1	LLDVPTGDCHISPK'	0.0616464	-
C1orf163'	C179	3	1	ACDLGHIWACANASR'	0.135182	-
C1orf31', 'unresolved: gi|331284144|ref|NP_001193570.1|'	C68	15	3	CLDENLEDASQCKK', 'DEYWKCLDENLEDASQCKK', 'DEYWKCLDENLEDASQCK'	-0.22471	-
C20orf3'	C149	11	2	DDEPVCGRPLGIR', 'TRDDEPVCGRPLGIR'	0.089507	-
C21orf33'	C153	1	1	NLSTFAVDGKDCK'	0.156705	-
C22orf28'	C485	6	2	NVTDVVNTCHDAGISKK', 'LVMEEAPESYKNVTDVVNTCHDAGISKK'	-0.0953525	-
C2orf28'	C107	2	1	VAFYCKTTR'	-0.24617	-
C3orf37'	C97	1	1	ESDPSKLQFNTTNCR'	0.1495	-
C5orf33'	C148	3	1	SSGLNLCTGTGSK'	-0.0835316	-
C5orf33'	C30	1	1	SEGHLCLPVR'	0.0941084	-
C6orf108'	C26	16	1	GEPGRPALYFCGSIR'	0.147476	-
C6orf125'	C13	8	1	LCEEWPVDETKR'	0.709788	-
C9orf142'	C180	2	1	RCPGESLINPGFK'	0.127442	-
C9orf78'	C145	1	1	NAEDCLYELPENIR'	-0.120759	-
CACNA2D1'	C685	1	1	KTPNNPSCNADLINR'	0.206625	-
CACYBP'	C154	1	1	VKTDTVLILCR'	0.305673	-
CAD'	C1889	11	1	KVAEPELMGTPDGTCYPPPPVPR'	0.179843	-
CAND1'	C131	6	1	TVIGELPPASSGSALAANVCKK'	-0.0484308	-
CAND1'	C1153	3	1	LVEPLRATCTTK'	0.133006	-
CAP1'	C427	2	1	NSLDCEIVSAK'	-0.0313653	-
CAPNS1'	C144	1	1	TDGFGIDTCR'	0.245372	-
CAPZA2'	C111	1	1	EATDPRPCEVENAVESWR'	0.111044	-
CAPZB', 'unresolved: gi|330864679|ref|NP_001193469.1|', 'unresolved: gi|330864681|ref|NP_001193470.1|'	C206	10	2	QMEKDETVSDCSPHIANIGR', 'DETVSDCSPHIANIGR'	0.236743	-
CAPZB', 'unresolved: gi|330864679|ref|NP_001193469.1|', 'unresolved: gi|330864681|ref|NP_001193470.1|'	C147	1	1	GCWDSIHVVEVQEK'	0.268493	-
CAPZB', 'unresolved: gi|330864679|ref|NP_001193469.1|', 'unresolved: gi|330864681|ref|NP_001193470.1|'	C62	8	2	DKVVGKDYLLCDYNR', 'DYLLCDYNR'	0.360968	-
CARS'	C27	2	1	RVQPQWSPPAGTQPCR'	0.161241	-
CASP4'	C109	1	1	LCPHEEFLR'	-0.0711598	-
CAST'	C639	12	3	KPADDQDPIDALSGDLDSCPSTTETSQNTAK', 'SEDSKKPADDQDPIDALSGDLDSCPSTTETSQNTAKDK', 'SEDSKKPADDQDPIDALSGDLDSCPSTTETSQNTAK'	-1.01945	-
CAST'	C386	3	1	AAAPAPVSEAVCR'	0.104592	-
CAST'	C219	14	4	EGITGPPADSSKPIGPDDAIDALSSDFTCGSPTAAGK', 'KEGITGPPADSSKPIGPDDAIDALSSDFTCGSPTAAGK', 'KEGITGPPADSSKPIGPDDAIDALSSDFTCGSPTAAGKK', 'EGITGPPADSSKPIGPDDAIDALSSDFTCGSPTAAGKK'	0.143986	-
CAT'	C377	2	1	LGPNYLHIPVNCPYR'	0.0761305	-
CAT'	C460	2	1	LCENIAGHLK'	0.167873	-
CBL'	C508	1	1	VCVPSSASALGTASK'	0.181069	-
CBS'	C15	4	2	PSETPQAEVGPTGCPHRSGPHSAK', 'PSETPQAEVGPTGCPHR'	0.11961	-
CBX8'	C261	1	1	RQDSDLVQCGVTSPSSAEATGK'	0.0271741	-
CCDC50'	C85	4	1	YKDLEQQDCEIAQEIQEK'	-0.0376502	-
CCDC51'	C316	1	1	QVHSCLEGLR'	0.0685766	-
CCDC58'	C74	9	3	DRVIKNCIAQTSAVVK', 'NCIAQTSAVVKNLREER', 'VIKNCIAQTSAVVK'	-0.167215	-
CCDC58'	C53	9	1	IDASQTCKQLYESLMAAHASR'	0.0552811	-
CCDC58'	C24	1	1	TIDDRIVHELNTTVPTASFAGK'	0.216904	-
CCDC86'	C127	1	1	CSQDQGVLASELAQNK'	-0.0325672	-
CCT2', 'unresolved: gi|311771535|ref|NP_001185771.1|'	C535	1	1	KRVPDHHPC'	-0.489775	-
CCT2', 'unresolved: gi|311771535|ref|NP_001185771.1|'	C289	1	1	HGINCFINR'	-0.151867	-
CCT3'	C360	5	1	NLQDAMQVCR'	0.0947167	-
CCT3'	C334	1	1	ACTILLR'	0.196245	-
CCT3'	C417	2	1	TLIQNCGASTIR'	0.0265145	Yes
CCT3'	C175	6	1	VEKIPGGIIEDSCVLR'	0.178101	Yes
CCT5'	C493	21	2	EMNPALGIDCLHK', 'EMNPALGIDCLHKGTNDMK'	0.0846382	-
CCT5'	C253	12	1	IAILTCPFEPPKPK'	0.0649778	Yes
CCT6A'	C282	4	1	VCGDSDKGFVVINQK'	-0.487293	-
CCT7'	C364	1	1	YNFFTGCPK'	0.413389	-
CCT7'	C450	5	2	QLCDNAGFDATNILNK', 'QLCDNAGFDATNILNKLR'	-0.0975862	Yes
CCT8'	C36	3	1	NIQACKELAQTTR'	0.105233	-
CCT8'	C430	5	2	QITSYGETCPGLEQYAIKK', 'QITSYGETCPGLEQYAIK'	0.121378	-
CCT8'	C325	1	1	LCKTVGATALPR'	0.193987	-
CD151'	C184	3	2	VVPDSCCKTVVALCGQR', 'SQEAGGRVVPDSCCKTVVALCGQR'	-0.268052	-
CD320'	C67	4	1	TSGLCVPLTWR'	0.0922046	-
CD3EAP'	C86	1	1	YRVLSSCPQAGEATLLAPSTEAGGGLTCASAPQGTLR'	0.0396255	-
CD3EAP'	C150	3	1	FCAFGGNPPVTGPR'	0.0905364	-
CD3EAP'	C14	10	1	FSCPPNFTAKPPASESPR'	0.11284	-
CD59'	C70	5	1	FEHCNFNDVTTR'	0.113718	-
CD97'	C402	1	1	QELLCAFWK'	0.511641	-
CDC37'	C336	1	1	CIDSGLWVPNSKASEAK'	1.73013	-
CDC42'	C105	1	1	WVPEITHHCPK'	-0.467057	Yes
CDC42EP4'	C313	1	1	DSSSLSSCTSGILEER'	0.176464	-
CDHR5'	C293	2	1	GNVNGTFIIHPDSGNLTVAR'	-0.215519	-
CDKAL1'	C538	2	1	NGLGNQLSSGSHTSAASQCDSASSR'	0.0670583	-
CDKN2AIP'	C178	1	1	ASAQQENSSTCIGSAIK'	0.100771	-
CDR2L'	C317	1	1	SCSDTALNAIVAKDPASR'	0.311466	-
CFL1'	C39	3	1	KAVLFCLSEDKK'	0.100783	-
CFL1'	C139	51	3	LTGIKHELQANCYEEVK', 'KLTGIKHELQANCYEEVK', 'HELQANCYEEVK'	0.141487	-
CGN'	C702	2	1	AKMVAEAEATVLGQR'	0.0944833	-
CHCHD2', 'LOC645317'	C134	1	1	LCEGFNEVLK'	0.28603	-
CHCHD3'	C183	9	2	RYESHPVCADLQAK', 'YESHPVCADLQAK'	0.120308	-
CHCHD7'	C41	4	1	LRDPDINPCLSESDASTR'	0.0506277	-
CHCHD8'	C54	14	2	QCQPQVQAFKDCMSEQQAR', 'QCQPQVQAFK'	0.466266	-
CHD3'	C1464	4	1	HLCEPGADGSETFADGVPR'	0.125893	-
CHD4'	C1594	3	1	STAPETAIECTQAPAPASEDEK'	0.0980382	-
CHD4', 'CHD5'	C1468	4	1	HLCEPGADGAETFADGVPR'	0.131762	-
CHMP5'	C20	7	1	AKPKAPPPSLTDCIGTVDSR'	0.0145862	-
CHORDC1'	C24	3	1	FDPETNSDDACTYHPGVPVFHDALK'	0.0988662	-
CIAPIN1'	C249	3	1	NCTCGLAEELEK'	0.038218	-
CISD1'	C83	4	2	SKKFPFCDGAHTK', 'KFPFCDGAHTK'	-0.0851191	-
CISD2'	C92	2	2	VVNEINIEDLCLTK', 'ENPKVVNEINIEDLCLTK'	0.0750932	Yes
CIZ1'	C252	2	1	TPAPEPEPCEASELPAKR'	0.10308	-
CKAP5'	C1113	3	1	FQPASAPAEDCISSSTEPKPDPK'	0.183781	-
CLCC1'	C60	3	2	DVSPDLSCADEISECYHKLDSLTYK', 'DVSPDLSCADEISECYHK'	0.761015	-
CLIC1'	C24	7	1	IGNCPFSQR'	0.100252	-
CLIC1'	C191	4	1	LHIVQVVCKK'	1.33807	-
CLIC1'	C178	1	1	KFLDGNELTLADCNLLPK'	1.58683	-
CLIC1'	C223	3	1	EEFASTCPDDEEIELAYEQVAKALK'	0.295429	Yes
CLIC4'	C234	9	2	DEFTNTCPSDKEVEIAYSDVAKR', 'DEFTNTCPSDKEVEIAYSDVAK'	0.151048	-
CLIP1', 'CLIP2'	C242	5	2	GEWCGVELDEPLGKNDGAVAGTR', 'GEWCGVELDEPLGK'	0.10078	-
CLTA'	C188	1	1	LCDFNPK'	-0.613337	-
CLTB'	C181	3	1	VAQLCDFNPK'	0.291287	-
CLTC'	C870	2	1	IHEGCEEPATHNALAK'	0.154388	-
CLTC', 'CLTCL1'	C918	1	1	DPHLACVAYER'	0.181642	-
CMBL'	C222	3	1	EDCSPADKPYIDEARR'	0.157599	-
CNBP'	C97	6	1	EQCCYNCGKPGHLAR'	0.0405617	-
CNPY2'	C86	1	1	SEAHLTELLEEICDR'	0.0832547	-
CNPY3'	C206	5	1	GKDTSCLAEQWSGK'	0.208693	-
COG5'	C173	1	1	LQVACDLLRR'	-0.025802	-
COG8'	C595	4	1	LEPAGPACPEGGR'	0.0682569	-
COG8'	C125	3	1	LLDRLPSFQQSCR'	0.112585	-
COL4A5', 'COL4A1'	C1509	1	1	AHGQDLGTAGSCLR'	0.142837	-
COMMD9'	C160	2	1	IQEDPSLCGDKPSISAVTVELSK'	0.124628	-
COMT'	C83	7	1	ILNHVLQHAEPGNAQSVLEAIDTYCEQK'	0.138536	-
COPB2'	C351	2	1	DMGSCEIYPQTIQHNPNGR'	0.120918	-
CORO1B'	C475	2	1	ICRLEEQLGR'	0.225657	-
CORO1C', 'CORO6'	C343	1	1	KCEPIIMTVPR'	0.385307	-
COX17'	C23	9	1	PGLVDSNPAPPESQEKKPLKPCCACPETK'	0.966112	-
COX5B'	C116	1	1	CGAHYKLVPQQLAH'	0.0955163	-
COX6B1'	C30	9	1	NCWQNYLDFHR'	-0.0263446	-
COX6B1'	C65	2	1	VYQSLCPTSWVTDWDEQR'	0.107394	-
CPD'	C195	2	1	EGDCGFGDGGPSGASGRDNSR'	0.109156	-
CPNE3'	C249	3	1	SSPVEFECINEK'	0.280556	-
CPNE8', 'CPNE5', 'CPNE9'	C65	1	1	TEVIDNTLNPDFVR'	-0.70057	-
CPS1'	C816	20	1	MCHPSIEGFTPR'	0.115472	-
CPS1'	C920	4	1	CLGLTEAQTR'	0.127807	-
CPS1'	C225	3	1	GNPTKVVAVDCGIK'	0.214664	-
CPSF6'	C476	5	1	VLISSLQDCLHGIESK'	0.125504	-
CPSF6'	C159	8	2	ELHGQNPVVTPCNK', 'RELHGQNPVVTPCNK'	0.13669	-
CRABP2', 'unresolved: gi|315013542|ref|NP_001186652.1|'	C82	8	1	VGEEFEEQTVDGRPCK'	0.119878	-
CRIP1'	C7	5	1	CNKEVYFAER'	-0.0210008	-
CRIP1'	C28	6	2	DWHRPCLK', 'VTSLGKDWHRPCLK'	0.243471	-
CRIP2'	C126	2	1	ASSVTTFTGEPNTCPR'	0.0957213	-
CRKL'	C44	2	1	DSSTCPGDYVLSVSENSR'	0.100459	-
CRYZ'	C45	4	1	VHACGVNPVETYIR'	0.155103	-
CS'	C101	11	2	GFSIPECQK', 'FRGFSIPECQK'	-0.391975	-
CSE1L'	C344	1	1	NLFEDQNTLTSICEK'	0.0524516	Yes
CSRP1'	C167	3	1	GLESTTLADKDGEIYCK'	-0.194077	Yes
CSTF2T'	C222	2	1	SQSVSVSGPGPGPGPGLCPGPNVLLNQQNPPAPQPQHLAR'	-0.212849	-
CTDP1', 'unresolved: gi|321267522|ref|NP_001189433.1|'	C542	1	1	DGLCGLGNGCADRK'	0.0709832	-
CTR9'	C817	1	1	QCSDLLSQAQYHVAR'	0.149294	-
CTSB'	C93	5	1	EQWPQCPTIK'	0.245248	-
CTSB'	C59	1	1	LCGTFLGGPKPPQR'	0.265278	-
CTSB'	C211	5	2	ICEPGYSPTYKQDK', 'ICEPGYSPTYK'	1.24427	-
CTTN'	C246	1	1	CALGWDHQEK'	-0.0714338	-
CUTC'	C223	1	1	ILEGSGATEFHCSAR'	0.278765	-
DAK'	C382	1	1	VCSTLLGLEEHLNALDR'	0.10289	-
DAXX'	C427	2	1	LQGTSSHSADTPEASLDSGEGPSGMASQGCPSASR'	-0.0125419	-
DAXX'	C720	3	1	LSQTPHSQPPRPGTCK'	0.124336	-
DAXX'	C699	1	1	VDSPSHGLVTSSLCIPSPAR'	0.126062	-
DAZAP1'	C85	3	1	NIDPKPCTPR'	0.0783442	-
DAZAP1'	C124	3	1	IFVGGIPHNCGETELR'	0.107778	-
DAZAP1'	C63	8	1	FKDPNCVGTVLASRPHTLDGR'	0.189673	-
DCK'	C9	1	1	SCPSFSASSEGTR'	0.10962	-
DCPS'	C37	3	1	EAGVGNGTCAPVRLPFSGFR'	0.0216676	-
DCTD'	C40	2	1	SKDPNSQVGACIVNSENK'	0.743379	-
DCTPP1'	C110	4	1	CRVDLPLAVLSK'	0.235856	-
DCUN1D1'	C29	2	1	TAVSCLSQNDWK'	0.074574	-
DDB1', 'LOC100290337'	C128	2	1	IGRPSETGIIGIIDPECR'	-0.0651075	-
DDB1', 'LOC100290337'	C378	1	1	QGQGQLVTCSGAFK'	0.0261651	-
DDT', 'DDTL'	C24	3	1	LCAAAASILGKPADR'	0.126276	-
DDX17'	C584	10	3	YRTTSSANNPNLMYQDECDRR', 'YRTTSSANNPNLMYQDECDR', 'TTSSANNPNLMYQDECDRR'	0.115586	-
DDX17', 'DDX5'	C277	2	1	LKSTCIYGGAPK'	-0.282898	-
DDX21'	C291	1	1	LSVACFYGGTPYGGQFER'	-0.38853	-
DDX39'	C164	7	1	NCPHVVVGTPGR'	0.106912	-
DDX54'	C73	9	2	LGPGRPLPTFPTSECTSDVEPDTR', 'KLGPGRPLPTFPTSECTSDVEPDTR'	0.1456	-
DDX59'	C60	1	1	HISESCPFPSPGGQLAEVHSVSPEQGAK'	-0.547633	-
DEPDC5', 'unresolved: gi|339276028|ref|NP_001229825.1|', 'unresolved: gi|339276033|ref|NP_001229826.1|'	C1488	2	1	FSGQQRR'	0.115818	-
DFFA'	C21	2	1	TLKPCLLRR'	0.0533471	-
DFFA'	C38	4	1	EQHGVAASCLEDLR'	0.0976805	-
DHX36'	C135	1	1	NTPCSENKLDIQEK'	0.142446	-
DIAPH1'	C1227	2	1	KAGCAVTSLLASELTK'	0.881106	-
DIDO1'	C498	1	1	EAACESSTPSWASDHNYNAVKPEK'	-0.238078	-
DIDO1'	C1665	4	1	VLLPTPPCGALQPGFPLQHDGER'	0.099497	-
DIDO1'	C976	4	1	TAPSSSCTAVASAASRPDSTHMVEAR'	0.103874	-
DIDO1'	C350	4	1	WRPGDADGTDCTSIGTIEQK'	0.177618	-
DLAT'	C291	2	1	DVPLGTPLCIIVEK'	0.0791149	-
DLD'	C80	1	1	NETLGGTCLNVGCIPSK'	-0.0208667	-
DLD'	C484	11	1	VCHAHPTLSEAFR'	0.0796396	-
DLG2', 'DLG3', 'DLG1', 'unresolved: gi|324120934|ref|NP_001191316.1|', 'unresolved: gi|324120936|ref|NP_001191315.1|', 'unresolved: gi|324120938|ref|NP_001191317.1|', 'unresolved: gi|332164718|ref|NP_001193698.1|'	C772	3	2	HCILDVSGNAIKR', 'HCILDVSGNAIK'	0.270949	-
DLGAP4'	C197	6	1	SLPDCTPHPNSISIDAGPR'	0.0877988	-
DNAJA4'	C397	1	1	EFCPNEQNWR'	-0.0051763	-
DNAJB1'	C179	3	1	VSLEEIYSGCTKK'	0.400053	-
DNAJC2'	C276	3	1	TLVDNAYSCDPR'	-0.0989352	-
DNAJC2'	C26	2	1	GTAITHALTSASTLCQVEPVGR'	0.133331	-
DNASE2'	C327	1	1	GGGTLCAQLPALWK'	0.0842432	-
DNASE2'	C308	2	2	GPWTCVGDMNR', 'GPWTCVGDMNRNQGEEQR'	0.233149	-
DOCK4'	C1723	1	1	ERPCSAIYPTPVEPSQR'	0.120968	-
DSP'	C57	8	1	RGVITDQNSDGYCQTGTMSR'	0.0977983	-
DSP'	C1069	2	1	FLDQNLQKYQAECSQFK'	0.242211	-
DSTN'	C135	11	2	FQGIKHECQANGPEDLNR', 'KFQGIKHECQANGPEDLNR'	0.207184	-
DTNB'	C560	1	1	STSAGSTPTHCPQDSLSGVGGDVQEAFAQGTRR'	0.516628	-
DTX3L'	C41	1	1	SSGGGECTVSTQEHEAPGTFR'	0.120744	-
DUS2L'	C475	2	1	AQELAQPGDLCK'	0.0372534	-
DUT'	C3	11	1	PCSEETPAISPSKR'	0.0926679	-
DUT'	C134	1	1	IAQLICER'	0.110668	-
DUT'	C78	9	1	TDIQIALPSGCYGR'	0.118761	-
DYNLL1'	C24	13	2	AVIKNADMSEEMQQDSVECATQALEK', 'NADMSEEMQQDSVECATQALEK'	-0.183791	Yes
DYNLL1', 'DYNLL2'	C56	5	1	YNPTWHCIVGR'	0.10702	-
EDC4'	C976	7	1	LCTQLEGLQSTVTGHVER'	0.117468	-
EEF1A1'	C411	219	2	SGDAAIVDMVPGKPMCVESFSDYPPLGR', 'FLKSGDAAIVDMVPGKPMCVESFSDYPPLGR'	-0.0179882	Yes
EEF1B2'	C50	21	1	SYIEGYVPSQADVAVFEAVSSPPPADLCHALR'	0.11617	-
EEF2'	C41	2	1	STLTDSLVCK'	0.47139	-
EEF2'	C567	1	1	DLEEDHACIPIKK'	1.21216	-
EEF2'	C812	8	1	SNTGGQAFPQCVFDHWQILPGDPFDNSSRPSQVVAETR'	0.115683	Yes
EFHD2'	C53	2	1	RLQMEGEGGGETPEQPGLNGAAAAAAGAPDEAAEALGSADCELSAK'	-0.440319	-
EGFR'	C879	2	1	WMALESILHR'	-0.398635	-
EGFR'	C986	1	1	MHLPSPTDSNFYR'	-0.243323	-
EGFR'	C506	1	1	ATGQVCHALCSPEGCWGPEPR'	-0.0115173	-
EGFR'	C852	4	1	ITDFGLAK'	0.573575	-
EGFR', 'ERBB4', 'ERBB2'	C716	4	1	VLGSGAFGTVYK'	-0.0243313	-
EGLN1'	C127	1	1	AKPPADPAAAASPCR'	0.0914739	-
EHBP1L1'	C221	4	1	TLCEEEEEGQGRPQQAVASPSNAEDTSPAPVSAPAPPAR'	0.137343	-
EIF1B', 'EIF1'	C69	3	2	FACNGTVIEHPEYGEVIQLQGDQR', 'FACNGTVIEHPEYGEVIQLQGDQRK'	-1.88404	-
EIF2AK4'	C107	2	1	SRLEELAKK'	-0.627855	-
EIF2B3'	C424	2	1	GADIKDCLIGSGQR'	0.174862	-
EIF2B4'	C69	8	2	GAEPETGSAVSAAQCQVGPTR', 'GAEPETGSAVSAAQCQGPTR'	0.11133	-
EIF2S1'	C218	4	1	AGLNCSTENMPIKINLIAPPR'	0.489006	-
EIF2S3'	C434	4	2	IVLTNPVCTEVGEK', 'ADLGKIVLTNPVCTEVGEK'	-0.0565009	Yes
EIF2S3'	C96	3	2	LDDPSCPRPECYR', 'IYKLDDPSCPRPECYR'	-0.165744	-
EIF2S3'	C105	6	2	SCGSSTPDEFPTDIPGTKGNFK', 'SCGSSTPDEFPTDIPGTK'	0.211216	-
EIF2S3'	C269	2	1	SFDVNKPGCEVDDLKGGVAGGSILK'	0.719916	Yes
EIF3C', 'EIF3CL', 'unresolved: gi|312433975|ref|NP_001186071.1|'	C79	3	1	CLEEFELLGK'	-0.121701	-
EIF3D'	C19	1	1	FMTPVIQDNPSGWGPCAVPEQFR'	0.177733	-
EIF3G'	C25	1	1	CVTSELLK'	0.945651	-
EIF4A2'	C67	5	1	AIIPCIK'	-0.58686	-
EIF4B'	C457	18	2	SLENETLNKEEDCHSPTSKPPKPDQPLK', 'EEDCHSPTSKPPKPDQPLK'	-0.12976	-
EIF4EBP1'	C62	2	1	FLMECR'	0.133889	-
EIF4G1'	C662	5	3	ANKTPLRPLDPTRLQGINCGPDFTPSFANLGR', 'TPLRPLDPTRLQGINCGPDFTPSFANLGR', 'LQGINCGPDFTPSFANLGR'	-0.176617	Yes
EIF5A', 'EIF5AL1', 'EIF5A2'	C73	2	2	YEDICPSTHNMDVPNIKR', 'YEDICPSTHNMDVPNIK'	-0.349175	-
EMD'	C147	1	1	QSVTSFPDADAFHHQVHDDDLLSSSEEECK'	-0.0601691	-
ENAH'	C62	10	2	KIQDHQVVINCAIPK', 'IQDHQVVINCAIPK'	0.144761	-
ENG'	C549	3	1	TGTLSCTVALRPK'	0.219323	-
ENO1', 'unresolved: gi|319996655|ref|NP_001188412.1|'	C337	5	2	AVNEKSCNCLLLK', 'SCNCLLLK'	-0.0614728	-
EPPK1'	C1151	1	1	DGTSLWDLLSSCHFTEEQR'	0.0585157	-
EPRS'	C1148	4	1	DLPIKLNQWCNVVR'	0.156701	-
EPRS'	C336	2	1	KGSQFGQSCCLR'	0.163321	-
EPRS'	C350	1	1	IDMSSNNGCMRDPTLYR'	0.232153	-
EPRS'	C1480	2	1	SLCIPFKPLCELQPGAK'	0.292549	Yes
ERCC5', 'unresolved: gi|324715041|ref|NP_001191354.1|'	C550	1	1	NETHAEVLEQQNELCPYESK'	0.00959085	-
ESD'	C28	3	1	VFEHDSVELNCK'	-0.000159749	-
ETFA'	C155	1	1	TIYAGNALCTVK'	-0.0899647	-
ETFB'	C42	2	1	HSMNPFCEIAVEEAVR'	0.106006	-
EWSR1'	C524	6	1	AGDWQCPNPGCGNQNFAWR'	0.118705	-
EXOC5'	C111	1	1	VCHLGDQLEGVNTPR'	0.252072	-
EXOSC1'	C15	1	1	LCNLEEGSPGSGTYTR'	0.127019	-
EXOSC6'	C98	4	1	LLCDFR'	0.137925	-
FADD'	C27	1	1	FLCLGR'	0.259409	-
FADS1'	C13	2	1	AARPAGLPCGAENPAR'	0.0643502	-
FAM105B'	C47	1	1	AAASGQPRPEMQCPAEHEEDMYR'	0.126951	-
FAM120A'	C14	4	1	HCPSAVVPVELQK'	0.0416433	-
FAM120A'	C1088	4	2	TCNTNPHLNALSTDSACRR', 'TCNTNPHLNALSTDSACR'	0.631436	-
FAM120A'	C825	3	1	EKTPLIDLCDGQADQAAK'	0.651336	-
FAM136A'	C57	4	1	CHVPLAQAQALVTSELEK'	0.49344	-
FAM192A'	C44	10	1	VRKPEDPEECPEEVYDPR'	0.132078	-
FAM3C'	C86	2	2	ICLEDNVLMSGVK', 'ICLEDNVLMSGVKNNVGR'	0.0113783	-
FAM3C'	C185	4	1	DNWVFCGGK'	0.333907	-
FAM3C'	C64	3	1	ACPEKHFAFK'	0.739667	-
FAM83A'	C356	4	1	SVSASSGPCSPAAPHPPPPPR'	0.117568	-
FAM83B'	C801	2	1	LCSSSDTLVSEGEENQKPK'	0.125579	-
FASN'	C2468	1	1	AKTGGAYGEDLGADYNLSQVCDGK'	0.0290626	Yes
FASN'	C1118	3	1	FCFTPHTEEGCLSER'	0.075357	-
FASN'	C2273	3	1	LSIPTYGLQCTR'	0.117884	Yes
FASN'	C1992	4	1	DGLLENQTPEFFQDVCKPK'	0.371118	Yes
FDFT1'	C6	1	1	CLGHPEEFYNLVR'	0.0841719	-
FDFT1'	C374	3	1	TQNLPNCQLISR'	0.199444	-
FKBP10'	C222	3	1	GMDQGLLGMCPGER'	0.0712027	-
FKBP10'	C279	6	1	DAVQLETLELPPGCVRR'	0.143886	-
FKBP15'	C1031	10	1	DGSLPPELSCIPSHR'	0.109178	-
FKBP15'	C828	3	1	DEHLQQYQEVCAQR'	0.1192	-
FKBP2'	C97	14	2	GWDQGLLGMCEGEKR', 'GWDQGLLGMCEGEK'	0.14144	-
FKBP9'	C47	7	1	RFVPDECPR'	0.0844269	-
FLNA'	C733	3	1	DNGNGTYSCSYVPR'	0.0947759	-
FLNA'	C205	3	1	ALGALVDSCAPGLCPDWDSWDASKPVTNAR'	0.132366	-
FLNA'	C1157	8	2	AHVVPCFDASKVK', 'AHVVPCFDASK'	0.156419	-
FLNA'	C1989	1	1	EEPCLLKR'	0.219741	-
FLNA'	C1453	7	1	CSGPGLSPGMVR'	0.425133	-
FLNA'	C2535	10	2	ATCAPQHGAPGPGPADASKVVAK', 'ATCAPQHGAPGPGPADASK'	0.683435	-
FLNB'	C1617	1	1	CLATGPGIASTVK'	-0.0771401	-
FLNB'	C1375	2	1	GAGIGGLGITVEGPSESKINCR'	0.030224	-
FLNB'	C991	2	1	VVPCLVTPVTGR'	0.0943152	-
FLNB'	C706	13	2	NRMDGTYACSYTPVK', 'MDGTYACSYTPVK'	0.117772	-
FLNB'	C1326	4	1	VAVTEGCQPSRVQAQGPGLK'	0.134767	-
FLNB'	C2501	4	1	SSTETCYSAIPK'	0.138689	-
FLNB'	C2333	10	2	VHSPSGAVEECHVSELEPDK', 'VHSPSGAVEECHVSELEPDKYAVR'	0.203328	-
FLNB'	C622	1	1	EPGEYAVHIMCDDEDIK'	0.246602	-
FLNB'	C604	4	1	IEYNDQNDGSCDVKYWPK'	0.278429	-
FLYWCH2'	C132	21	3	SRQDPGTDRTEDSGLAAGPPEAAGENFAPCSVAPGK', 'QDPGTDRTEDSGLAAGPPEAAGENFAPCSVAPGK', 'TEDSGLAAGPPEAAGENFAPCSVAPGK'	0.01966	-
FLYWCH2'	C64	5	2	GVHCVMSLGVPGPATLAK', 'KGVHCVMSLGVPGPATLAK'	0.137384	-
FNIP1'	C76	1	1	LCSDAQVK'	-0.0750192	-
FOXK1'	C439	6	1	SGGLQTPECLSR'	0.131896	-
FOXP1'	C29	1	1	SNGSAIQNGSGGSNHLLECGGLR'	0.442741	-
FSCN1'	C80	8	1	YLAADKDGNVTCER'	0.0809565	Yes
FTSJ1'	C295	4	1	EIRPQDCPISR'	0.171978	-
FUBP1'	C148	6	1	SCMLTGTPESVQSAKR'	0.0563374	-
FUBP1'	C132	7	1	IQQESGCKIQIAPDSGGLPER'	0.0735028	-
FUBP1'	C332	3	1	CQHAAEIITDLLR'	0.0845019	-
FUBP3'	C460	3	1	SSGCFPNMAAK'	0.177944	-
FUBP3'	C125	2	1	IQIASESSGIPERPCVLTGTPESIEQAK'	0.22675	-
FUS'	C428	13	1	CPNPTCENMNFSWR'	0.11934	-
FUS'	C444	1	1	NECNQCKAPKPDGPGGGPGGSHMGGNYGDDR'	1.35522	-
G3BP1'	C73	7	1	VMSQNFTNCHTK'	0.163583	-
GAGE2C', 'GAGE7', 'GAGE12G', 'GAGE12F', 'GAGE2B', 'GAGE12I'	C85	5	2	QDPAAAQEGEDEGASAGQGPKPEAHSQEQGHPQTGCECEDGPDGQEMDPPNPEEVK', 'QDPAAAQEGEDEGASAGQGPKPEAHSQEQGHPQTGCECEDGPDGQEMDPPNPEEVKTPEEGEK'	0.914346	-
GALM'	C305	1	1	HSGFCLETQNWPDAVNQPR'	0.0990978	-
GALNT2'	C539	3	1	HVGSNLCLDSR'	0.0753702	-
GANAB'	C41	1	1	TCEESSFCKR'	-0.108218	-
GAPDH'	C247	53	3	LTGMAFRVPTANVSVVDLTCR', 'VPTANVSVVDLTCR', 'VIPELNGKLTGMAFRVPTANVSVVDLTCR'	0.0131321	Yes
GAPDH'	C197	5	2	DGRGALQNIIPASTGAAK', 'DGRGALQNIIPASTGAAKAVGK'	0.229424	-
GAPDH'	C152	12	2	YDNSLKIISNASCTTNCLAPLAK', 'IISNASCTTNCLAPLAK'	0.180126	Yes
GART'	C237	1	1	LLEGDGGPNTGGMGAYCPAPQVSNDLLLK'	-0.645051	Yes
GART'	C62	1	1	ISNTAISISDHTALAQFCK'	-0.0451061	-
GART'	C93	7	1	SAGVQCFGPTAEAAQLESSKR'	0.121828	-
GBF1', 'unresolved: gi|313747582|ref|NP_001186307.1|', 'unresolved: gi|313747584|ref|NP_001186308.1|'	C613	5	1	ETARPSCEIVDGTR'	0.0932004	-
GCLM'	C72	3	1	EFPDVLECTVSHAVEK'	0.174302	-
GCN1L1'	C2255	3	1	GEHVPGFCLPK'	0.156143	-
GDI2'	C202	1	1	TDDYLDQPCYETINR'	0.0820829	Yes
GEMIN5'	C1415	2	1	STANGPDKNEPEVEAEQPLCSSQSQCK'	0.919725	-
GEMIN7'	C44	7	1	RAPLRPEVPEIQECPIAQESLESQEQR'	0.191	-
GEMIN8'	C180	1	1	LDSYVNADHDLYCNTR'	0.186809	-
GLG1'	C324	1	1	FCENTQAGEGRVYK'	0.129058	-
GLG1'	C269	3	2	DAHSQGEVVSCLEK', 'LGEKDAHSQGEVVSCLEK'	0.239368	-
GLO1'	C61	3	1	CDFPIMK'	0.191731	-
GLO1'	C139	27	2	GFGHIGIAVPDVYSACKR', 'GFGHIGIAVPDVYSACK'	0.104582	Yes
GLUD1'	C376	5	1	AKPYEGSILEADCDILIPAASEK'	0.0374894	-
GNG12'	C43	6	1	ASADLMSYCEEHAR'	0.0976736	-
GOLGB1'	C681	1	1	SLSAVPDIGQCHQDELER'	-0.317549	-
GOLGB1'	C395	3	1	TGQELQSACDALKDQNSK'	0.0449887	-
GOLGB1'	C1257	3	1	ESIDGKLPSTDQQESCSSTPGLEEPLFK'	0.582837	-
GOT1'	C46	3	2	TDDCHPWVLPVVKK', 'TDDCHPWVLPVVK'	0.151931	-
GPATCH8'	C402	1	1	EEGAGATEPEYYHYIPPAHCK'	0.0959245	-
GPATCH8'	C939	2	1	HKYSSSDDDYSLSCSQSR'	0.20354	-
GPC1'	C343	2	1	VIQGCGNPKVNPQGPGPEEK'	-0.273267	-
GPHN'	C26	1	1	VGVLTVSDSCFR'	-1.81762	-
GPRIN1'	C778	1	1	SPCPEAAAPPPGPR'	0.0933785	-
GPRIN1'	C428	2	1	MDPMCSGKPELLSPGQAER'	0.165334	-
GPS1'	C211	1	1	GHDDLGDHYLDCGDLSNALK'	-0.285681	-
GRB2'	C32	3	1	VLNEECDQNWYK'	-0.577283	-
GRHPR'	C288	1	1	NCVILPHIGSATHR'	0.0896406	-
GRN'	C481	1	1	QHCCPAGYTCNVK'	0.118706	-
GRPEL1'	C108	2	1	LYGIQAFCK'	0.275149	-
GSK3B'	C14	2	1	TTSFAESCKPVQQPSAFGSMK'	0.266022	Yes
GSPT2', 'GSPT1'	C582	4	1	FVKQDQVCIAR'	0.474831	-
GSTO1'	C32	5	1	FCPFAER'	0.182218	-
GTF2B'	C15	4	1	VTCPNHPDAILVEDYR'	0.149562	-
GTF2F2'	C116	4	1	AECRPAASENYMR'	0.138079	-
GTF2I'	C215	3	1	SILSPGGSCGPIKVK'	1.80381	-
HACL1'	C261	2	1	GVVPDNHPYCVGAAR'	0.169042	-
HADH'	C211	5	1	ALGKHPVSCKDTPGFIVNR'	0.387981	-
HADHB'	C435	1	1	FNNWGGSLSLGHPFGATGCR'	0.131869	-
HCCS'	C25	2	1	GLSPSAPAVAVQASNASASPPSGCPMHEGK'	-0.373632	-
HCCS'	C35	10	4	GCPVNTEPSGPTCEKK', 'MKGCPVNTEPSGPTCEK', 'MKGCPVNTEPSGPTCEKK', 'GCPVNTEPSGPTCEK'	-0.0758515	-
HCCS'	C176	2	1	WEALHAAECPCGPSLIR'	0.213838	-
HDGF'	C12	5	1	CGDLVFAK'	-0.0758198	-
HECTD1'	C254	1	1	MAAAGGTVSGPSSACKPGR'	0.184917	-
HEXIM1'	C79	2	1	AFPQLGGRPGPEGEGSLESQPPPLQTQACPESSCLR'	0.235157	-
HINT1'	C38	1	1	CLAFHDISPQAPTHFLVIPK'	0.0748388	-
HINT1'	C84	6	1	CAADLGLNKGYR'	0.0885439	-
HK2'	C368	3	1	LGLDPTQEDCVATHR'	0.0793446	-
HLA-C'	C345	2	2	SSGGKGGSCSQAASSNSAQGSDESLIACK', 'SSGGKGGSCSQAASSNSAQGSDESLIACKA'	-0.223412	-
HMOX2'	C265	5	1	KCPFYAAEQDK'	0.929565	-
HN1L'	C118	12	1	DHVFLCEGEEPK'	0.114659	-
HNRNPD'	C126	6	1	FGEVVDCTLKLDPITGR'	0.0629437	-
HNRNPH1'	C22	4	2	GLPWSCSADEVQR', 'VRGLPWSCSADEVQR'	-1.07677	-
HNRNPH1'	C34	2	1	FFSDCKIQNGAQGIR'	0.0838211	-
HNRNPH1', 'HNRNPH3', 'HNRNPH2'	C122	1	1	LRGLPFGCSK'	0.319454	-
HNRNPK'	C184	1	1	LFQECCPHSTDR'	0.041726	-
HNRNPM'	C694	1	1	GCGVVKFESPEVAER'	-0.278468	-
HNRNPM'	C676	8	2	DKFNECGHVLYADIK', 'FNECGHVLYADIK'	0.177613	-
HNRNPUL1'	C432	3	1	AIVICPTDEDLKDR'	-0.121491	-
HNRNPUL2'	C518	2	1	SRDLLVQQASQCLSK'	0.0958683	-
HNRPDL', 'unresolved: gi|332801090|ref|NP_001193929.1|'	C177	3	1	FGEVVDCTIKTDPVTGR'	0.109262	-
HNRPDL', 'unresolved: gi|332801090|ref|NP_001193929.1|', 'HNRNPAB'	C177	4	1	FGEVVDCTIK'	-0.106757	-
HPDL'	C82	3	1	HAVPSATNLCFDVADAGAATR'	-0.0292912	-
HPRT1'	C206	10	2	DLNHVCVISETGKAK', 'DLNHVCVISETGK'	0.105442	-
HSD17B10'	C58	11	4	KLGNNCVFAPADVTSEKDVQTALALAK', 'LGNNCVFAPADVTSEK', 'LGNNCVFAPADVTSEKDVQTALALAK', 'KLGNNCVFAPADVTSEK'	0.450117	-
HSD17B4', 'unresolved: gi|313151210|ref|NP_001186221.1|', 'unresolved: gi|313482810|ref|NP_001186220.1|'	C189	5	1	SNIHCNTIAPNAGSR'	0.101048	-
HSDL2'	C11	2	1	LAGCTVFITGASR'	-0.00592814	-
HSP90B1'	C645	6	2	AVVSQRLTESPCALVASQYGWSGNMER', 'LTESPCALVASQYGWSGNMER'	0.383773	Yes
HSPA1B', 'HSPA1A'	C574	1	1	VLDKCQEVISWLDANTLAEK'	0.404992	-
HSPA1B', 'HSPA1A'	C603	12	2	RKELEQVCNPIISGLYQGAGGPGPGGFGAQGPK', 'ELEQVCNPIISGLYQGAGGPGPGGFGAQGPK'	0.515753	-
HSPA1B', 'HSPA1A', 'HSPA6'	C306	3	1	ARFEELCSDLFR'	0.153436	-
HSPA4'	C417	4	1	WNSPAEEGSSDCEVFSK'	0.0733274	Yes
HSPA4'	C779	29	2	IKELTSTCSPIISKPKPK', 'ELTSTCSPIISKPKPK'	0.430613	-
HSPA4'	C34	4	3	AGGIETIANEYSDRCTPACISFGPKNR', 'AGGIETIANEYSDRCTPACISFGPK', 'CTPACISFGPK'	0.439082	-
HSPA4L'	C782	16	2	ELDNFCNPIIYKPKPK', 'SKELDNFCNPIIYKPKPK'	-0.118008	-
HSPA4L'	C34	1	1	SGGIETIANEYSDRCTPACISLGSR'	-0.0112641	-
HSPA4L'	C589	8	2	VKSIDLPIQSSLCR', 'SIDLPIQSSLCR'	0.176957	-
HSPA8'	C603	11	2	ELEKVCNPIITK', 'VCNPIITK'	0.106181	-
HSPA9'	C366	1	1	RTIAPCQK'	-0.148927	-
HSPA9'	C348	2	1	AQFEGIVTDLIRR'	0.119736	-
HSPA9'	C608	36	3	MEEFKDQLPADECNK', 'MEEFKDQLPADECNKLK', 'DQLPADECNKLKEEISK'	0.313474	-
HSPD1'	C60	1	1	TVIIEQSWGSPK'	0.102463	-
HSPD1'	C418	1	1	DRVTDALNATR'	0.3101	-
HSPD1'	C442	2	1	VTDALNATRAAVEEGIVLGGGCALLR'	0.101495	Yes
HSPD1'	C447	10	2	CIPALDSLTPANEDQKIGIEIIKR', 'CIPALDSLTPANEDQK'	0.137692	Yes
HSPH1'	C845	23	2	EEDLEDKNNFGAEPPHQNGECYPNEK', 'NNFGAEPPHQNGECYPNEK'	-0.00213068	-
HSPH1'	C34	4	2	CTPSVISFGSK', 'AGGIETIANEFSDRCTPSVISFGSKNR'	0.10422	-
HSPH1'	C796	24	2	IKELNNTCEPVVTQPKPK', 'ELNNTCEPVVTQPKPK'	0.292606	-
HSPH1'	C658	2	1	FICEQDHQNFLR'	0.296008	-
HUWE1'	C471	1	1	ECPFVIKPK'	0.296928	-
IARS'	C87	1	1	FGWDCHGLPVEYEIDK'	0.269237	Yes
ICAM1'	C48	2	1	GGSVLVTCSTSCDQPK'	0.0312941	-
ICAM1'	C457	3	1	DLEGTYLCR'	0.104824	-
IGF2BP3'	C194	4	1	QKPCDLPLR'	0.211373	-
IGF2R'	C1408	2	1	YSDNWEAITGTGDPEHYLINVCK'	0.01499	-
IGF2R'	C1420	1	1	SLAPQAGTEPCPPEAAACLLGGSKPVNLGR'	0.0533146	-
IGF2R'	C228	1	1	ACPPGTAACLVR'	0.0969774	-
IGSF8', 'unresolved: gi|331284207|ref|NP_001193594.1|'	C127	5	1	LQAQDAGIYECHTPSTDTR'	0.0952624	-
ILKAP'	C301	3	1	CGVTSVPDIRR'	0.109054	-
IMPDH1'	C517	2	1	FVPYLIAGIQHGCQDIGAR'	0.100087	-
INF2'	C1029	1	1	ATEPVATSNPAGDPVGSTRCPASEPGLDATTASESR'	0.171995	-
INPPL1'	C926	1	1	SGSRKPAFTEASCPLSR'	0.216248	-
INTS6'	C783	3	1	DKEQCAEENIPASSLNK'	0.11143	-
IPO5'	C128	2	1	KKVCDIAAELAR'	-0.705145	-
IPO5'	C990	12	2	TKENVNATENCISAVGK', 'ENVNATENCISAVGK'	-0.392286	-
IRF2BP2'	C549	4	1	QSIKQQGASGEVYCPSGEK'	0.749743	-
IRF2BP2', 'C14orf4'	C521	2	1	LEDTHFVQCPSVPSHK'	0.168853	-
ISCU'	C44	2	1	NVGTGLVGAPACGDVMK'	0.050784	-
ISCU'	C113	1	1	LHCSMLAEDAIK'	0.222165	-
ISYNA1'	C541	1	1	KGPVPAATNGCTGDANGHLQEEPPMPTT'	0.364709	-
ITGA5'	C156	1	1	AHGSSILACAPLYSWR'	0.121078	-
ITGA5'	C957	3	1	EHQPFSLQCEAVYK'	0.165983	-
ITGB1'	C691	6	1	DKLPQPVQPDPVSHCK'	-0.444664	-
ITGB4'	C828	2	1	LCTENLLKPDTR'	0.135971	-
ITGB5'	C211	1	1	LFPNCVPSFGFR'	0.157748	-
ITPK1'	C391	1	1	LGCNAGVSPSFQQHCVASLATK'	0.157498	-
ITPKA', 'ITPKC', 'ITPKB'	C314	2	1	YMQWR'	0.0684241	-
IWS1'	C749	5	1	ALRPGDPGFCAR'	0.125649	-
KARS'	C496	9	2	EICNAYTELNDPMRQR', 'EICNAYTELNDPMR'	0.0833353	-
KARS'	C427	8	2	ILDDICVAK', 'KILDDICVAK'	0.307325	Yes
KDELC1'	C491	1	1	VEPQTEDDLFPCTCHR'	0.0412752	-
KDELC2'	C156	1	1	TLSCPTKEPQIAK'	-0.0752581	-
KDELC2'	C495	5	1	DGMELVPQPEDSTAICQCHR'	0.0980742	-
KDM3B'	C509	1	1	SQSNGVLATENKPLGFSFGCSSAQEAQK'	0.253436	-
KDSR'	C245	7	1	LISETTSVCKPEQVAK'	-0.0692088	-
KHSRP'	C176	15	2	GGEQINKIQQDSGCKVQISPDSGGLPER', 'IQQDSGCKVQISPDSGGLPER'	0.930653	-
KIAA0100'	C163	3	2	FLLDSDGKR', 'FLLDSDGK'	-1.46073	-
KIAA0101'	C54	2	1	YAGGNPVCVRPTPK'	0.0633376	-
KIAA1598'	C565	4	1	VTFQPPSSIGCR'	0.148934	-
KIAA1715'	C149	6	1	ECEPPSAGAAVTARPGQEIR'	0.0506509	-
KIAA1967'	C754	1	1	VVTQNICQYR'	0.131606	-
KLC2'	C474	4	1	LEAAHTLEDCASR'	0.133091	-
KRAS'	C118	1	1	DSEDVPMVLVGNKCDLPSR'	0.724042	-
L1CAM'	C354	5	1	LDCQVQGRPQPEVTWR'	0.15873	-
L1CAM'	C158	2	1	ETVKPVEVEEGESVVLPCNPPPSAEPLR'	0.188426	-
LACTB2'	C21	2	1	VLGCNPGPMTLQGTNTYLVGTGPRR'	0.167014	-
LACTB2'	C100	2	1	SINNDTTYCIK'	0.417746	-
LARP1'	C977	3	1	CPSQSSSRPAAMISQPPTPPTGQPVREDAK'	-0.195915	-
LARP4'	C552	2	1	KLSYAEVCQKPPKEPSSVLVQPLR'	-0.760719	-
LARP4'	C528	1	1	ASTASPCNNNINAATAVALQEPR'	0.0221451	-
LARP4B'	C633	4	1	ETHSVDRLPSALTATACK'	-0.218134	-
LCP1'	C42	1	1	AACLPLPGYR'	0.157898	-
LDHA'	C131	2	1	FIIPNVVKYSPNCK'	-0.278188	-
LDHA', 'LDHAL6A'	C163	9	1	NRVIGSGCNLDSAR'	0.0954362	-
LDHA', 'LDHAL6A', 'LDHB', 'LDHC'	C163	4	2	VIGSGCNLDSAR', 'VIGSGCNLDSARFR'	0.108803	-
LDHB'	C164	1	1	HRVIGSGCNLDSAR'	0.138328	-
LDLR'	C696	2	1	FTCACPDGMLLAR'	-0.0880256	-
LDLR'	C839	3	1	TTEDEVHICHNQDGYSYPSR'	0.0100005	-
LETM1'	C552	4	1	EEIDILSDACSKLQEQK'	1.13978	-
LGALS1'	C61	49	2	FNAHGDANTIVCNSK', 'FNAHGDANTIVCNSKDGGAWGTEQR'	-0.0488998	-
LGALS1'	C43	16	1	DSNNLCLHFNPR'	0.098655	-
LIG1'	C895	1	1	EDKQPEQATTSAQVACLYR'	0.045329	-
LIMA1'	C316	1	1	ENVPPGPEVCITHQEGEK'	0.19017	-
LIMCH1'	C930	3	1	GVHEDHQLDTEAGAPHCGTNPQLAQDPSQNQQTSNPTHSSEDVKPK'	-0.0813514	-
LIMCH1'	C577	6	2	ERECPTVAPAHSLTK', 'ECPTVAPAHSLTK'	0.132819	-
LIN7C'	C47	2	1	VLQSEFCNAVR'	0.0698825	-
LMF2'	C696	2	2	DSGAASEQATAAPNPCSSSSR', 'RRPASQKDSGAASEQATAAPNPCSSSSR'	0.0805865	-
LMNA'	C588	1	1	SRTVLCGTCGQPADK'	0.0681985	-
LMNA'	C522	5	1	AQNTWGCGNSLR'	0.117756	-
LOC100507680', 'LOC100510436'	C125	19	1	MYGCDVGPDGR'	0.0825061	-
LPP'	C262	9	1	SAQPSPHYMAAPSSGQIYGSGPQGYNTQPVPVSGQCPPPSTR'	0.166901	-
LRP2BP'	C56	3	1	GDTLAYFLR'	-0.0142317	-
LRPPRC'	C927	3	1	LQWFCDR'	0.154101	-
LRRC59'	C48	3	1	ATILDLSCNK'	-0.00285019	-
LRRC59'	C59	1	1	LTTLPSDFCGLTHLVK'	0.115939	Yes
LRRFIP1'	C702	7	2	SEDADRCTLPEHESPSQDISDACEAESTER', 'CTLPEHESPSQDISDACEAESTER'	0.0819197	-
LSM14A'	C375	8	3	SFFDNISCDDNR', 'TKSFFDNISCDDNR', 'SFFDNISCDDNRER'	0.220366	-
LSM14A'	C361	9	2	QEKPVNGEDKGDSGVDTQNSEGNADEEDPLGPNCYYDKTK', 'QEKPVNGEDKGDSGVDTQNSEGNADEEDPLGPNCYYDK'	0.589662	-
LSM7'	C76	1	1	QLGLVVCR'	0.178117	-
LTA4H'	C147	1	1	AILPCQDTPSVK'	-0.0910897	-
LTBP1'	C169	1	1	QQLQGVNVCGGR'	0.142076	-
LUC7L2'	C348	3	2	FRDQDLASCDRDR', 'FRDQDLASCDR'	0.117617	-
LUZP1'	C560	2	1	GHVLGNGSQVTQAANSGCSK'	0.157695	-
MACROD1'	C199	1	1	AAGPLLTDECR'	-0.0539902	-
MANF'	C151	3	2	ILDDWGETCKGCAEK', 'ILDDWGETCK'	0.233737	-
MAP4'	C535	5	2	NVCLPPEMEVALTEDQVPALK', 'NVCLPPEMEVALTEDQVPALKTEAPLAK'	-0.472099	-
MAP4'	C1008	2	1	CGSKDNIKHVPGGGNVQIQNK'	-0.435526	-
MAP4'	C635	3	1	KCSLPAEEDSVLEK'	-0.149136	-
MAP7'	C644	12	1	GALTGGTEVSALPCTTNAPGNGKPVGSPHVVTSHQSK'	0.222287	-
MAP7'	C253	10	1	SKSTAALSGEAASCSPIIMPYK'	0.246253	-
MAP7D1'	C373	3	1	SASASPLTPCSVTR'	0.113289	-
MAP7D1'	C328	1	1	GCDPGRGPTWGR'	0.121109	-
MAP7D1'	C361	2	1	GPQPDRTHPSAAVPVCPR'	0.131071	-
MARK3', 'MARK2'	C294	1	1	RGTLEQIMKDR'	0.294012	-
MARS'	C441	5	1	SCPVVQSSQHLFLDLPK'	-0.0144441	-
MAT2B'	C17	1	1	ELSIHFVPGSCR'	0.0921104	-
MCAM'	C272	8	1	CLADGNPPPHFSISK'	0.0980128	-
MCAM'	C161	7	1	VYKAPEEPNIQVNPLGIPVNSKEPEEVATCVGR'	1.3163	-
MCMBP'	C108	4	2	DVAECGPQQELDLNSPR', 'YRDVAECGPQQELDLNSPR'	-0.479513	-
MCMBP'	C200	3	1	QAGSVGGLQWCGEPK'	0.160824	-
MDH1', 'unresolved: gi|312283701|ref|NP_001186040.1|', 'unresolved: gi|312283703|ref|NP_001186041.1|'	C154	10	2	SAPSIPKENFSCLTR', 'ENFSCLTR'	0.0889928	-
MDH1', 'unresolved: gi|312283701|ref|NP_001186040.1|', 'unresolved: gi|312283703|ref|NP_001186041.1|'	C137	8	2	VIVVGNPANTNCLTASK', 'KSVKVIVVGNPANTNCLTASK'	0.157656	-
MDH2'	C212	24	2	TIIPLISQCTPK', 'TIIPLISQCTPKVDFPQDQLTALTGR'	0.0318252	Yes
MDH2'	C93	1	1	GCDVVVIPAGVPR'	0.0357233	Yes
MDH2'	C285	15	2	SQETECTYFSTPLLLGKK', 'SQETECTYFSTPLLLGK'	0.0925391	-
MDH2'	C275	2	1	EGVVECSFVK'	0.0969982	-
MDH2'	C89	24	4	AAVKGYLGPEQLPDCLKGCDVVVIPAGVPR', 'GYLGPEQLPDCLKGCDVVVIPAGVPR', 'AAVKGYLGPEQLPDCLK', 'GYLGPEQLPDCLK'	0.262211	Yes
MED15'	C620	3	1	TFVPAMTAIHGPPITAPVVCTR'	0.0850983	-
MED19'	C163	1	1	LHTGPLPEQCR'	0.0878043	-
MED25'	C429	1	1	SLPCQVYVNHGENLK'	-0.0159102	-
MED26'	C111	1	1	GLAGATGSANGGAHNCRPEVGAAGPPR'	-0.83532	-
MED29'	C202	4	1	DIHTALLDCANKVTGK'	0.100052	-
MEPCE'	C324	2	1	DAPQPYELNTAINCR'	0.020675	-
MEPCE'	C54	2	1	CAPSAGSPAAAVGR'	0.106616	-
MEPCE'	C244	3	1	DITDPLSLNTCTDEGHVVLASPLK'	0.310652	-
METAP2'	C121	6	1	VQTDPPSVPICDLYPNGVFPK'	0.166739	-
METTL11A'	C64	2	2	FLREGPNKTGTSCALDCGAGIGR', 'EGPNKTGTSCALDCGAGIGR'	0.731491	-
MFF'	C209	5	1	VCPPHMLPEDGANLSSAR'	0.112003	-
MGMT'	C176	4	1	GNPVPILIPCHR'	0.133972	-
MGMT'	C55	4	1	LELSGCEQGLHEIK'	0.180644	-
MIF'	C81	20	3	IGGAQNRSYSKLLCGLLAER', 'SYSKLLCGLLAER', 'LLCGLLAER'	0.215502	Yes
MKI67'	C2342	3	1	IACKSPQPDPVDTPASTK'	-0.0931207	-
MKI67'	C1859	1	1	ILCKSPQSDPADTPTNTK'	0.0384473	-
MKI67IP'	C237	1	1	VSGTLDTPEKTVDSQGPTPVCTPTFLER'	0.0776672	-
MLL2'	C1909	1	1	EQHLGCGTPGLEGSR'	0.13014	-
MLL2'	C4424	2	1	EEPCALGAQSVKR'	0.16934	-
MMAB'	C185	3	1	ISSALHFCR'	0.0988809	-
MNAT1'	C293	3	1	AASPQDLAGGYTSSLACHR'	0.158125	-
MOCOS'	C558	1	1	VWNNSSTVNAVPVAPPVCDVAR'	0.208437	-
MPG'	C51	5	1	AGQPHSSSDAAQAPAEQPHSSSDAAQAPCPR'	0.109409	-
MPST'	C65	4	1	HIPGAAFFDIDQCSDR'	0.111389	-
MPZL1'	C203	1	1	DYTGCSTSESLSPVKQAPR'	-0.197629	-
MRPL14'	C90	1	1	ALIVGHCMPGPR'	0.127091	-
MRPL17'	C129	6	1	GNCLPPLPLPR'	0.0972957	-
MRPL50'	C52	8	1	KEPILVCPPLR'	0.159109	-
MRPL53'	C63	2	1	HDGSEPCVDVLFGDGHR'	-0.0199126	-
MRPL53'	C21	3	1	VQFCPFEK'	0.502805	-
MRPS11'	C112	7	1	ASHNNTQIQVVSASNEPLAFASCGTEGFR'	0.065437	-
MRPS17'	C100	4	1	VIDPVTGKPCAGTTYLESPLSSETTQLSK'	0.209451	-
MRPS18B'	C105	1	1	NKVVGNPCPICR'	0.405504	-
MRPS6'	C105	1	1	ECEGIVPVPLAEK'	0.00128743	-
MT2A'	C44	1	1	CAQGCICKGASDKCSCCA'	0.478303	-
MTCH2'	C79	4	1	LCSGVLGTVVHGK'	0.0342939	-
MTHFD1'	C143	1	1	GDLNDCFIPCTPK'	0.336894	-
MYH9'	C1379	3	1	MEDSVGCLETAEEVKR'	0.0386039	-
MYL6'	C32	9	1	TGDGKILYSQCGDVMR'	0.0996214	-
MYL6', 'unresolved: gi|313851001|ref|NP_001186558.1|', 'MYL6B'	C32	11	1	ILYSQCGDVMR'	0.0547708	-
MYPN'	C118	3	1	HSPNLSFEPNFCQDNPR'	0.160436	-
NACC1'	C178	8	1	VKTEQQESDSVQCMPVAK'	-0.174835	-
NAGPA'	C115	1	1	AVEPLRTFSVLEPGGPGGCAAR'	0.0475351	-
NAPRT1'	C463	10	1	VWPPGAQEPCTVRPAQVEPLLR'	0.126883	-
NASP'	C708	15	1	KPTDGASSSNCVTDISHLVR'	-0.355356	-
NCDN'	C98	2	1	EAPDGCPDHVLR'	0.117325	-
NCOR1'	C2403	4	1	MLSSTPPTPIACAPSAVNQAAPHQQNR'	0.0239674	-
NDUFA5'	C17	6	1	TTGLVGLAVCNTPHER'	0.0877439	-
NDUFAB1'	C140	3	1	LMCPQEIVDYIADKK'	-1.12576	-
NDUFB10'	C119	1	1	EGQNYQQNCIKEVEQFTQVAK'	0.179319	-
NDUFB11'	C151	8	3	YREANGLPIMESNCFDPSK', 'YREANGLPIMESNCFDPSKIQLPEDE', 'EANGLPIMESNCFDPSK'	0.00116436	-
NDUFS6'	C112	2	1	TGTCGYCGLQFR'	0.0754608	-
NDUFS6'	C87	8	1	VIACDGGGGALGHPK'	0.0942392	-
NDUFV1'	C125	1	1	YLVVNADEGEPGTCKDR'	-0.418528	-
NFKB2'	C738	2	1	SSFRGHTPLDLTCSTK'	0.257663	-
NFX1'	C92	1	1	SQQTSFQSSPCNKSPK'	0.276715	-
NHP2'	C18	5	1	TKIKADPDGPEAQAEACSGER'	0.0819122	-
NHP2L1'	C30	5	2	LLDLVQQSCNYKQLR', 'LLDLVQQSCNYK'	0.224129	-
NIPBL'	C279	4	1	NAASFPLRSPQPVCSPAGSEGTPK'	-0.832766	-
NIPBL'	C304	4	1	GSRPPLILQSQSLPCSSPR'	0.154025	-
NIT2'	C44	3	1	IVSLPECFNSPYGAK'	0.219195	-
NLN'	C153	2	1	IVHLQETCDLGK'	0.156385	-
NME2', 'NME1', 'NME1-NME2'	C109	5	1	GDFCIQVGR'	0.0965762	-
NOL3'	C109	7	2	SYDPPCPGHWTPEAPGSGTTCPGLPR', 'DRSYDPPCPGHWTPEAPGSGTTCPGLPR'	0.217013	-
NOP10'	C28	4	1	KFDPMGQQTCSAHPAR'	0.0655904	-
NOP58'	C439	3	2	TYDPSGDSTLPTCSKK', 'TYDPSGDSTLPTCSK'	0.313315	-
NPC1'	C177	1	1	ALGLLCGK'	0.40096	-
NPM1'	C275	5	1	FINYVKNCFR'	0.168127	-
NPTN'	C218	5	1	AEDSGEYHCVYHFVSAPK'	0.152987	-
NRAS'	C118	4	2	DSDDVPMVLVGNKCDLPTR', 'VKDSDDVPMVLVGNKCDLPTR'	-0.637211	-
NSUN2'	C758	27	1	AGEPNSPDAEEANSPDVTAGCDPAGVHPPR'	0.0884224	-
NUBP1'	C307	5	1	IQEFCNLHQSK'	0.0340858	-
NUBP1'	C277	7	1	NCDKGQSFFIDAPDSPATLAYR'	0.0884711	-
NUFIP2'	C234	2	1	GCENLNIVQDK'	0.319727	-
NUMA1'	C1136	1	1	AEVSKLEQQCQKQQEQADSLER'	0.19026	-
NUMA1'	C1937	1	1	TCYPLESRPSLSLGTITDEEMK'	0.281661	-
NUP153'	C66	1	1	YFNKNEDVCSCSTDTSEVPR'	0.211226	-
NUP210'	C543	2	1	VYVIEPHSMEFAPCQVEAR'	0.0943079	-
NUP50'	C305	1	1	DTTQSKPVSSPFPTKPLEGQAEGDSGECK'	0.0465971	-
NUP62'	C475	5	1	DIIEHLNTSGAPADTSDPLQQICK'	0.120239	-
NUPL1'	C252	6	1	ALKDENLPPVICQDVENLQK'	0.913368	-
NUSAP1'	C255	2	1	SCGPASQSTLGLK'	0.207149	-
OCRL'	C104	1	1	FEIPDEEHCLK'	0.264792	-
OGFR'	C443	6	1	TGTQEVGGQDPGEAVQPCRQPLGAR'	0.0942927	-
OSBP'	C276	1	1	ITSNAMINACR'	0.0490261	-
OTUB1'	C91	2	1	TRPDGNCFYR'	0.535362	-
OTUD4'	C424	2	1	DEQAFPALSSSSVNQSASQSSNPCVQRK'	-0.227866	-
OXCT1'	C504	4	1	STGCDFAVSPK'	-0.18291	-
PABPC4', 'PABPC3', 'PABPC1'	C339	5	1	SKGFGFVCFSSPEEATK'	0.185858	-
PACSIN3'	C402	3	1	MSEEDEQGWCQGQLQSGR'	0.159186	-
PAFAH1B3'	C205	2	1	LGYTPVCR'	0.129621	-
PAICS'	C281	8	1	VVVLMGSTSDLGHCEK'	-0.0659844	-
PAICS'	C288	1	1	IKKACGNFGIPCELR'	3.24732	-
PAK4'	C58	2	1	RPKPLVDPACITSIQPGAPK'	0.300079	-
PARK7'	C46	46	2	VTVAGLAGKDPVQCSR', 'AGIKVTVAGLAGKDPVQCSR'	0.0445039	-
PARK7'	C53	29	2	DVVICPDASLEDAKK', 'DVVICPDASLEDAK'	0.0509333	-
PAWR'	C173	7	2	STGVVNIPAAECLDEYEDDEAGQKER', 'RRSTGVVNIPAAECLDEYEDDEAGQK'	-0.155355	-
PBK'	C70	1	1	INPICNDHYR'	0.220355	-
PBXIP1'	C588	1	1	YRAPQGCSGVDECAR'	0.0978901	-
PCBP1'	C109	15	2	LVVPATQCGSLIGKGGCK', 'LVVPATQCGSLIGK'	-0.383056	Yes
PCBP1'	C54	2	1	INISEGNCPERIITLTGPTNAIFK'	-0.854251	-
PCBP1'	C201	10	1	CSDAAGYPHATHDLEGPPLDAYSIQGQHTISPLDLAK'	-0.283305	-
PCBP1'	C158	5	1	AITIAGVPQSVTECVK'	0.125497	-
PCBP1'	C194	30	1	VMTIPYQPMPASSPVICAGGQDR'	0.126679	-
PCBP1', 'PCBP2', 'PCBP3'	C54	1	1	INISEGNCPER'	0.124369	-
PCBP2'	C109	3	1	LVVPASQCGSLIGKGGCK'	-0.269188	-
PCBP2', 'PCBP3'	C109	8	1	LVVPASQCGSLIGK'	0.123145	-
PCNA'	C162	5	1	DLSHIGDAVVISCAK'	0.0979393	-
PCNA'	C148	4	1	ICRDLSHIGDAVVISCAK'	0.196927	-
PCYT1A'	C346	3	1	TSPPCSPANLSR'	0.0721088	-
PDCD2L'	C49	1	1	LGGIPDALPTVAAPRPVCQR'	0.266357	-
PDCD6IP'	C40	5	1	FIQQTYPSGGEEQAQYCR'	0.0870418	-
PDHX'	C307	4	1	STVPHAYATADCDLGAVLK'	0.119609	-
PDIA3'	C85	11	1	VDCTANTNTCNKYGVSGYPTLK'	-0.729104	-
PDIA3'	C62	1	1	LAPEYEAAATR'	-0.0362374	-
PDLIM1'	C73	4	2	IKGCTDNLTLTVAR', 'GCTDNLTLTVAR'	0.100831	-
PDLIM5'	C73	4	1	GCTGSLNMTLQR'	0.132761	-
PDLIM5'	C213	20	3	QPTVTSVCSETSQELAEGQRR', 'TAVNVPRQPTVTSVCSETSQELAEGQR', 'TAVNVPRQPTVTSVCSETSQELAEGQRR'	0.159471	-
PEBP1'	C168	9	3	YELRAPVAGTCYQAEWDDYVPK', 'APVAGTCYQAEWDDYVPKLYEQLSGK', 'APVAGTCYQAEWDDYVPK'	0.458241	Yes
PECI'	C338	10	2	EKLHAVNAEECNVLQGR', 'LHAVNAEECNVLQGR'	0.114188	-
PECI'	C47	4	1	QATEGPCNMPKPGVFDLINK'	0.151647	-
PFAS'	C502	1	1	ACVEAPKGNPICSLHDQGAGGNGNVLK'	0.130187	-
PFAS'	C512	6	1	GNPICSLHDQGAGGNGNVLK'	0.15955	-
PFAS'	C1044	2	1	MGPSYCLPPTFPK'	0.264659	-
PFDN5'	C49	3	1	DCLNVLNKSNEGK'	-0.826977	-
PFKM'	C709	1	1	IFANTPDSGCVLGMR'	0.137561	-
PFN1'	C128	20	2	CYEMASHLRR', 'CYEMASHLR'	0.114401	-
PFN1'	C71	3	1	CSVIRDSLLQDGEFSMDLR'	0.367001	-
PGAM1', 'LOC100290936'	C153	26	4	YADLTEDQLPSCESLKDTIAR', 'RYADLTEDQLPSCESLKDTIAR', 'RYADLTEDQLPSCESLK', 'YADLTEDQLPSCESLK'	0.0684038	-
PGD'	C170	2	1	VGTGEPCCDWVGDEGAGHFVK'	0.117986	-
PGK1'	C50	3	1	AAVPSIKFCLDNGAK'	0.0652077	Yes
PGK1'	C108	13	1	ACANPAAGSVILLENLR'	0.101916	Yes
PGRMC1', 'PGRMC2'	C129	6	2	DASRGLATFCLDK', 'GLATFCLDK'	0.208297	-
PHAX'	C51	5	1	AFQNTATACAPVSHYR'	0.13576	-
PHF3'	C402	1	1	NKIEPLGYCEDAESNR'	0.114161	-
PHGDH'	C369	7	1	NAGNCLSPAVIVGLLK'	0.030164	Yes
PHGDH'	C18	5	2	VLISDSLDPCCRK', 'VLISDSLDPCCR'	0.118912	-
PHGDH'	C281	10	1	ALVDHENVISCPHLGASTK'	0.121982	Yes
PIN1'	C113	11	2	IKSGEEDFESLASQFSDCSSAK', 'SGEEDFESLASQFSDCSSAK'	0.0694582	-
PITPNB'	C13	3	1	VVLPCSVQEYQVGQLYSVAEASK'	0.137989	-
PJA2'	C288	1	1	QTEHSPEDAACGPGHICSEQNTNDR'	-0.08169	-
PKM2', 'LOC652797', 'unresolved: gi|332164775|ref|NP_001193725.1|', 'unresolved: gi|332164777|ref|NP_001193726.1|', 'unresolved: gi|332164781|ref|NP_001193728.1|'	C49	5	2	NTGIICTIGPASR', 'LDIDSPPITARNTGIICTIGPASR'	0.138231	-
PLAUR'	C293	2	1	SGCNHPDLDVQYR'	0.161002	-
PLCB3'	C193	1	1	VETALESCGLK'	-0.069857	-
PLCB3'	C1176	6	1	LLAQLAQECQEQR'	0.108997	-
PLD3'	C487	1	1	DWDSPYSHDLDTSADSVGNACR'	0.212396	-
PLEC'	C939	1	1	EYGSCSHHYQQLLQSLEQGAQEESR'	0.0467433	-
PLEC'	C3177	4	1	CRPDQLTGLSLLPLSEK'	0.180991	-
PLEKHA5'	C891	1	1	SAVEQLCLAESTRPR'	0.149796	-
PLEKHA5'	C473	1	1	TRPESICSVTPSTHDK'	0.200637	-
PLIN2'	C302	4	1	SIGYDDTDESHCAEHIESR'	0.0901568	-
PLIN2'	C84	1	1	LEPQIAVANTYACK'	0.179697	-
PLIN3'	C39	16	1	VASMPLISSTCDMVSAAYASTK'	0.220485	-
PLIN3'	C341	20	3	DIAQQLQATCTSLGSSIQGLPTNVKDQVQQARR', 'DIAQQLQATCTSLGSSIQGLPTNVK', 'DIAQQLQATCTSLGSSIQGLPTNVKDQVQQAR'	0.211898	Yes
PLOD2'	C494	1	1	DKLDPDMALCR'	0.381269	-
PLS3'	C463	6	2	LENCNYAVELGKHPAK', 'KLENCNYAVELGKHPAK'	-0.0693637	-
PLS3'	C349	2	1	AESMLQQADKLGCR'	0.26068	-
PLS3'	C104	11	1	EGICALGGTSELSSEGTQHSYSEEEK'	0.22135	Yes
PLXNB2'	C364	3	1	SFPCGSEHLPYPLGSR'	0.095372	-
PLXNB2'	C112	1	1	LVECGSLFK'	0.429932	-
PNP'	C31	2	1	HRPQVAIICGSGLGGLTDK'	0.123675	-
PNPO'	C156	3	1	KLPEEEAECYFHSRPK'	1.83862	-
PODXL'	C349	1	1	LISLICR'	0.133801	-
PODXL2'	C548	4	1	FVENGCHDNPTLDVASDSQSEMQEK'	-0.136893	-
POM121C'	C196	1	1	EEELCHHSSSSTPLAADKESQGEK'	0.470713	-
PON2'	C42	2	1	EVESVDLPHCHLIK'	0.132313	-
POTEE', 'POTEF', 'ACTA2', 'unresolved: gi|315570273|ref|NP_001186822.1|', 'unresolved: gi|316659409|ref|NP_001186883.1|', 'ACTA1', 'ACTB', 'ACTG1', 'ACTG2', 'ACTC1', 'ACTBL2'	C938	1	1	SYELPDGQVITIGNER'	0.231063	-
POTEE', 'POTEF', 'ACTA2', 'unresolved: gi|315570273|ref|NP_001186822.1|', 'unresolved: gi|316659409|ref|NP_001186883.1|', 'ACTA1', 'ACTB', 'ACTG1', 'ACTG2', 'ACTC1', 'POTEI'	C728	2	1	AVFPSIVGRPR'	0.153302	-
PPA1'	C242	72	5	TNGKGISCMNTTLSESPFKCDPDAAR', 'GISCMNTTLSESPFKCDPDAAR', 'KTNGKGISCMNTTLSESPFK', 'TNGKGISCMNTTLSESPFK', 'GISCMNTTLSESPFK'	-0.979188	-
PPA1'	C270	12	2	AIVDALPPPCESACTVPTDVDKWFHHQKN', 'AIVDALPPPCESACTVPTDVDKWFHHQK'	0.0479626	-
PPA1'	C113	4	1	HTGCCGDNDPIDVCEIGSK'	0.160425	-
PPIA'	C161	8	2	TSKKITIADCGQLE', 'KITIADCGQLE'	-0.264846	Yes
PPIA'	C62	20	1	IIPGFMCQGGDFTRHNGTGGK'	0.139654	-
PPIA'	C115	11	1	HTGPGILSMANAGPNTNGSQFFICTAK'	0.504422	-
PPIA', 'LOC100293160'	C52	14	1	ALSTGEKGFGYKGSCFHR'	0.385228	-
PPIA', 'LOC390956', 'LOC100293160'	C52	11	1	GFGYKGSCFHR'	0.101811	-
PPIA', 'LOC390956', 'PPIAL4C', 'PPIAL4B', 'PPIAL4A'	C62	40	1	IIPGFMCQGGDFTR'	0.0982362	-
PPIAL4E', 'PPIAL4D', 'PPIAL4F'	C62	3	1	IIPGFMCQGGDFTRPNGTGDK'	4.91364	-
PPIB'	C202	19	1	DKPLKDVIIADCGK'	-0.763281	-
PPIG'	C310	5	2	ECNPPNSQPASYQR', 'ERECNPPNSQPASYQR'	0.120297	-
PPIL1'	C36	1	1	TCKNFAELAR'	-1.93546	-
PPIL1'	C133	5	1	VCQGIGMVNR'	0.16302	-
PPM1G'	C164	1	1	YGQNCHKGPPHSK'	-0.408831	-
PPP1R2'	C86	5	1	IDEPSTPYHSMMGDDEDACSDTEATEAMAPDILAR'	0.117919	-
PPP2R1A'	C174	14	2	NLCSDDTPMVRR', 'NLCSDDTPMVR'	0.128529	-
PPP2R1B'	C186	2	2	SLCSDDTPMVRR', 'SLCSDDTPMVR'	0.134133	-
PPP4R2'	C377	6	2	DLLHSEGSENEGPVSSSSSDCR', 'DLLHSEGSENEGPVSSSSSDCRETEELVGSNSSK'	0.232568	-
PPP5C', 'unresolved: gi|324021716|ref|NP_001191213.1|'	C404	1	1	RGVSCQFGPDVTK'	-0.202515	-
PPP5C', 'unresolved: gi|324021716|ref|NP_001191213.1|'	C11	4	1	TECAEPPRDEPPADGALKR'	0.0663642	-
PPP6R3'	C764	5	1	CAAPRPPSSSPEQR'	0.109174	-
PRDX1', 'unresolved: gi|320461711|ref|NP_001189360.1|', 'PRDX2'	C140	1	1	QITVNDLPVGR'	0.276103	-
PRDX3'	C229	4	1	AFQYVETHGEVCPANWTPDSPTIKPSPAASK'	0.0547448	Yes
PRDX4'	C245	3	1	HGEVCPAGWKPGSETIIPDPAGK'	0.135153	-
PRDX4'	C51	54	2	TREEECHFYAGGQVYPGEASR', 'EEECHFYAGGQVYPGEASR'	0.199599	-
PRDX5'	C100	18	2	KGVLFGVPGAFTPGCSK', 'GKKGVLFGVPGAFTPGCSK'	0.30624	-
PRDX6'	C91	5	1	DINAYNCEEPTEKLPFPIIDDR'	0.0858906	Yes
PRDX6'	C47	5	1	DFTPVCTTELGR'	0.107533	Yes
PREP'	C25	1	1	ICDPYAWLEDPDSEQTK'	0.0829054	-
PRKAR1A'	C362	4	1	VLGPCSDILKR'	-0.0747928	-
PRKCSH'	C428	1	1	LCPFKLVSQKPK'	-0.73628	-
PRKCSH'	C70	7	3	DGSDEPGTAACPNGSFHCTNTGYKPLYIPSNRVNDGVCDCCDGTDEYNSGVICENTCK', 'DGSDEPGTAACPNGSFHCTNTGYKPLYIPSNR', 'DGSDEPGTAACPNGSFHCTNTGYKPLYIPSNRVNDGVCDCCDGTDEYNSGVICENTCKEK'	-0.267269	-
PRKCSH'	C485	14	1	LLCGKETMVTSTTEPSR'	0.04359	-
PRKCSH'	C97	3	1	VNDGVCDCCDGTDEYNSGVICENTCKEK'	0.104421	-
PRKCSH'	C471	20	3	FSAMKYEQGTGCWQGPNR', 'YEQGTGCWQGPNRSTTVR', 'YEQGTGCWQGPNR'	0.145437	-
PRMT5'	C22	3	1	DLNCVPEIADTLGAVAK'	0.0821646	Yes
PROSC'	C261	1	1	CAADVKAPLEVAQEH'	0.0929288	-
PRRC2A', 'unresolved: gi|314122241|ref|NP_004629.3|'	C437	6	1	GGPPCKPPAPEDEDEAWR'	0.191232	-
PRRC2C'	C177	7	1	ETNDDNYGPGPSLRPPNVACWR'	-0.00415785	-
PRRC2C'	C895	6	1	SVEDVRPHHTDANNQSACFEAPDQK'	0.163477	-
PRRC2C'	C2781	4	2	VDSDSSKPPETLTDPPGVCQEK', 'AQKVDSDSSKPPETLTDPPGVCQEK'	0.471437	-
PSAP'	C33	2	1	GSAVWCQNVK'	-0.0373952	-
PSAP'	C482	1	1	IGACPSAHKPLLGTEK'	0.118161	-
PSAPL1'	C366	5	1	LCGNRRR'	1.26438	-
PSIP1'	C204	4	1	MVKQPCPSESDIITEEDK'	-0.18003	-
PSMC1'	C58	1	1	TKGPDAASKLPLVTPHTQCR'	0.471695	-
PSMD1'	C806	10	1	SNCKPSTFAYPAPLEVPK'	0.0889979	-
PSMD1'	C898	15	1	VLTMPETCR'	0.11015	-
PSMD13'	C114	2	1	VKSSDEAVILCK'	-0.684671	-
PSMD4'	C37	3	2	LQAQQDAVNIVCHSK', 'NGDFLPTRLQAQQDAVNIVCHSK'	0.205775	-
PSMD9'	C59	13	1	GIGMNEPLVDCEGYPR'	0.125805	-
PSMD9'	C81	3	1	HNIICLQNDHK'	0.265855	-
PSME1'	C22	5	1	VDVFREDLCTK'	0.0819391	-
PSME2'	C91	1	1	CGFLPGNEK'	0.84764	-
PSME3'	C92	6	1	RLDECEEAFQGTK'	0.0602947	-
PSMF1'	C185	1	1	QPPWCDPLGPFVVGGEDLDPFGPR'	0.0768189	-
PSPH'	C38	17	2	ICGVEDAVSEMTRR', 'ICGVEDAVSEMTR'	0.0907852	-
PTBP1'	C23	27	3	RGSDELFSTCVTNGPFIMSSNSASAANGNDSKK', 'RGSDELFSTCVTNGPFIMSSNSASAANGNDSK', 'GSDELFSTCVTNGPFIMSSNSASAANGNDSKK'	0.209402	-
PTGFRN'	C515	1	1	TTEEDRGNYYCVVSAWTK'	0.860154	-
PURB'	C17	4	1	GGGGGPCGFQPASR'	0.113878	-
PUS1'	C14	2	1	AGNAEPPPAGAACPQDRR'	0.276454	-
PXN'	C108	6	1	TSSVSNPQDSVGSPCSR'	0.127688	-
QDPR'	C161	6	1	GAVHQLCQSLAGK'	0.127052	-
R3HDM2'	C386	2	1	ISRPGMALGAPEVCNQVTSSQSVR'	-0.300908	-
RAB11FIP1'	C318	2	1	SNVCINGNHVYLEQPEAK'	0.242413	-
RAB34'	C19	5	2	DRVLAELPQCLR', 'DRVLAELPQCLRK'	-0.0246229	-
RABEPK'	C80	1	1	HQWDLDTCK'	-0.181965	-
RABEPK'	C36	5	2	VGHSCSYLPPVGNAK', 'VGHSCSYLPPVGNAKR'	0.328277	-
RANBP1'	C99	37	1	ICANHYITPMMELKPNAGSDR'	-0.0483652	-
RANBP3'	C116	1	1	SAGGSSPEGGEDSDREDGNYCPPVKR'	0.218881	-
RAP1B', 'RAP1BL'	C141	2	1	QWNNCAFLESSAK'	0.122505	-
RAP1B', 'RAP1BL'	C118	6	1	VKDTDDVPMILVGNKCDLEDER'	0.725298	-
RAP1GDS1'	C118	2	1	ALGNICYDSHEGR'	0.0895379	-
RARS'	C32	1	1	NCGCLGASPNLEQLQEENLKLK'	0.0259939	-
RBBP4'	C167	6	2	HPSKPDPSGECNPDLR', 'TPSSDVLVFDYTKHPSKPDPSGECNPDLR'	0.0608428	-
RBBP4'	C138	3	1	YMPQNPCIIATK'	0.0656877	-
RBBP6'	C44	1	1	LKAADCDLQITNAQTK'	-0.519687	-
RBBP6'	C174	2	1	NCPTNGDKNFESGPR'	0.197982	-
RBBP7'	C97	3	1	VHIPNDDAQFDASHCDSDK'	0.0520326	-
RBBP7'	C166	8	2	HPAKPDPSGECNPDLR', 'TPSSDVLVFDYTKHPAKPDPSGECNPDLR'	0.15988	-
RBM10', 'unresolved: gi|325120982|ref|NP_001191395.1|', 'unresolved: gi|325120984|ref|NP_001191396.1|', 'unresolved: gi|325120986|ref|NP_001191397.1|'	C219	2	1	INEDWLCNK'	0.566586	-
RBM15', 'unresolved: gi|319996623|ref|NP_001188474.1|'	C667	1	1	HCAPSPDRSPELSSSR'	1.93895	-
RBM24', 'RBM38'	C24	2	1	ACKDPNPIIDGR'	0.073482	-
RBM4', 'unresolved: gi|311771540|ref|NP_001185772.1|', 'unresolved: gi|311771542|ref|NP_001185773.1|'	C89	3	1	LHVGNISPTCTNK'	0.992384	-
RCC2'	C209	2	1	LIEGLSHEVIVSAACGR'	0.0171809	-
RCC2'	C305	8	2	AQRIEYDCELVPR', 'IEYDCELVPR'	0.0922639	-
RCC2'	C337	10	1	DVACGANHTLVLDSQKR'	0.126616	-
RCC2'	C158	2	1	TVVSGSCAAHSLLITTEGK'	0.207334	-
REXO2'	C137	1	1	QQTPPGLCPLAGNSVHEDKK'	0.214979	-
RFC4'	C141	2	1	SDGKPCPPFK'	-0.0935989	-
RG9MTD1'	C78	2	1	SSVQEECVSTISSSKDEDPLAATR'	0.101424	-
RHOA'	C159	3	1	IGAFGYMECSAK'	0.265004	-
RHOA', 'RHOC'	C107	4	1	HFCPNVPIILVGNKK'	0.36614	-
RHOB'	C159	2	1	IQAYDYLECSAK'	0.107348	-
RHOT2'	C185	1	1	QLRPACAQALTR'	0.134877	-
RIMS1'	C1689	4	3	ASQSSLESSTGPPCIR', 'RASQSSLESSTGPPCIR', 'RASQSSLESSTGPPCIRS'	0.183292	-
RNASEH2A'	C24	1	1	LSSPVPAVCRK'	0.13726	-
RNASEH2C'	C34	3	1	DAVPATLHLLPCEVAVDGPAPVGR'	0.134749	-
RNF126'	C229	2	1	IQALPTVPVTEEHVGSGLECPVCK'	0.0112075	-
RNF149'	C90	2	1	EGAHGLVGVPWAPGGDLEGCAPDTR'	0.0620258	-
RNGTT'	C13	1	1	WLNCPR'	0.0317939	-
RNH1'	C75	1	1	SNELGDVGVHCVLQGLQTPSCK'	0.0786699	-
ROBO1', 'LOC642132'	C147	3	1	SRPDEGVYVCVAR'	0.182627	-
RPA2'	C219	7	2	ACPRPEGLNFQDLK', 'ACPRPEGLNFQDLKNQLK'	0.323255	-
RPAP1'	C195	1	1	NQGCQLPGSSHSFQGPNLVTGK'	0.0970687	-
RPL10'	C195	3	1	LIPDGCGVK'	0.217047	-
RPL10'	C49	7	2	AKVDEFPLCGHMVSDEYEQLSSEALEAAR', 'VDEFPLCGHMVSDEYEQLSSEALEAAR'	0.216494	Yes
RPL10A'	C66	7	1	FSVCVLGDQQHCDEAK'	0.0579614	Yes
RPL12'	C141	1	1	EILGTAQSVGCNVDGR'	0.132575	Yes
RPL12'	C17	8	1	CTGGEVGATSALAPK'	-0.602565	-
RPL14'	C42	10	2	ALVDGPCTQVRR', 'ALVDGPCTQVR'	0.106128	-
RPL18'	C134	2	2	GCGTVLLSGPRKGR', 'GCGTVLLSGPR'	-0.00506297	-
RPL18A'	C109	1	1	DLTTAGAVTQCYR'	0.0962297	Yes
RPL23'	C28	6	1	ISLGLPVGAVINCADNTGAK'	0.0902671	Yes
RPL23'	C125	3	1	ECADLWPR'	0.127776	-
RPL27A'	C70	2	1	NQSFCPTVNLDK'	0.264815	Yes
RPL28'	C13	14	2	NCSSFLIKR', 'NCSSFLIK'	0.0521486	-
RPL30'	C92	1	1	VCTLAIIDPGDSDIIR'	0.162549	-
RPL30'	C52	3	1	LVILANNCPALRK'	0.267331	-
RPL30'	C85	7	2	TGVHHYSGNNIELGTACGK', 'TGVHHYSGNNIELGTACGKYYR'	0.429467	-
RPL34'	C46	2	2	SACGVCPGRLRGVR', 'SACGVCPGRLR'	0.103363	-
RPL36'	C48	19	4	DMIREVCGFAPYERR', 'DMIREVCGFAPYER', 'EVCGFAPYER', 'EVCGFAPYERR'	0.104921	-
RPL37'	C19	2	1	NKTHTLCRR'	-0.950545	-
RPL4'	C125	2	1	YAICSALAASALPALVMSK'	0.115309	Yes
RPL4'	C208	1	1	RGPCIIYNEDNGIIK'	0.151256	Yes
RPL4'	C96	47	2	SGQGAFGNMCRGGR', 'SGQGAFGNMCR'	0.10045	-
RPL7A'	C182	4	2	MGVPYCIIKGK', 'KMGVPYCIIK'	0.159967	-
RPL7A'	C199	6	1	TCTTVAFTQVNSEDKGALAK'	0.207704	-
RPLP0'	C27	2	1	CFIVGADNVGSK'	-0.520669	Yes
RPLP1'	C61	24	2	ALANVNIGSLICNVGAGGPAPAAGAAPAGGPAPSTAAAPAEEK', 'ALANVNIGSLICNVGAGGPAPAAGAAPAGGPAPSTAAAPAEEKK'	-0.161442	Yes
RPP25'	C70	1	1	AIVFSGCGR'	0.075494	-
RPP25'	C16	1	1	SEEAPAGCGAEGGGPGSGPFADLAPGAVHMR'	0.128909	-
RPP25'	C80	1	1	TVTCAEILKR'	0.163111	-
RPS11'	C131	5	1	DVQIGDIVTVGECRPLSK'	0.0855399	Yes
RPS11'	C60	4	1	KCPFTGNVSIR'	0.1977	-
RPS17', 'unresolved: gi|312284072|ref|NP_001185986.1|'	C35	6	1	VCEEIAIIPSKK'	0.090555	-
RPS20'	C36	3	1	SLEKVCADLIR'	0.0752474	-
RPS25'	C59	2	1	LCKEVPNYKLITPAVVSER'	0.193535	-
RPS27', 'RPS27L'	C77	1	1	ARLTEGCSFR'	0.105753	-
RPS29'	C39	9	2	KYGLNMCR', 'YGLNMCR'	0.335313	-
RPS3A'	C201	1	1	ACQSIYPLHDVFVR'	0.100326	-
RPS5'	C66	2	1	FRKAQCPIVER'	0.157359	Yes
RPS5'	C172	13	2	TIAECLADELINAAKGSSNSYAIK', 'TIAECLADELINAAK'	0.174814	Yes
RPS6'	C12	2	1	LNISFPATGCQK'	-0.100794	Yes
RPS8'	C174	3	1	LLACIASRPGQCGR'	0.173572	-
RPSA'	C148	2	1	ADHQPLTEASYVNLPTIALCNTDSPLR'	0.0849289	Yes
RRBP1'	C500	8	2	SKCEELSGLHGQLQEAR', 'CEELSGLHGQLQEAR'	0.159508	-
RRM1'	C779	3	1	ERNTAAMVCSLENR'	0.337808	-
RRP1B'	C583	2	2	AGPGSLELCGLPSQK', 'KAGPGSLELCGLPSQK'	0.270865	-
RRP1B'	C628	4	1	VMSNLVEHNGVLESEAGQPQALGSSGTCSSLKK'	0.520629	-
RSL1D1'	C47	1	1	KAVDALLTHCK'	0.0722638	-
RUVBL2'	C227	8	2	FVQCPDGELQKR', 'FVQCPDGELQK'	-0.318417	-
RXRB'	C191	1	1	GLHCPPPPGGPGAGKR'	0.0353373	-
S100A11'	C13	7	2	CIESLIAVFQK', 'ISSPTETERCIESLIAVFQK'	0.117663	Yes
SAFB2', 'SAFB', 'unresolved: gi|321267469|ref|NP_001188267.1|', 'unresolved: gi|321267471|ref|NP_001188268.1|', 'unresolved: gi|321267473|ref|NP_001188269.1|'	C224	2	1	ILDILGETCK'	1.1182	-
SAP18'	C45	1	1	TCPLLLR'	0.154349	-
SARNP'	C20	3	1	LAELKQECLAR'	0.136433	-
SCAF1'	C675	4	2	SGDGSEKAPAPAPPPSGSTSCGDR', 'SGDGSEKAPAPAPPPSGSTSCGDRDSR'	0.0406406	-
SCML2'	C324	1	1	EKPLPVICSTSAASLK'	0.0152553	-
SCRN1'	C290	3	1	SSPCIHYFTGTPDPSR'	0.0840066	-
SCRN1'	C324	4	1	TQSPCFGDDDPAKKEPR'	0.248815	-
SCRN2'	C277	1	1	DKESGICMDSGGFR'	0.0424253	-
SDHB'	C98	3	2	EGICGSCAMNINGGNTLACTRR', 'EGICGSCAMNINGGNTLACTR'	-0.0604476	-
SEC13'	C187	2	1	FASGGCDNLIK'	0.275619	-
SEC16A'	C107	8	1	DSSQGPCEPLPGPLTQPR'	0.0802892	-
SEC16A'	C504	1	1	HGAVCHTGAPDATLHTVHPDSVSSSYSSR'	0.143777	-
SEPHS1'	C31	7	1	GTGCKVPQDVLQK'	0.291464	-
SEPT7', 'unresolved: gi|339639597|ref|NP_001229885.1|'	C203	1	1	ADTLTPEECQQFKK'	1.30213	-
SEPT9'	C230	6	1	SQEATEAAPSCVGDMADTPR'	0.106028	-
SERBP1'	C11	9	2	PGHLQEGFGCVVTNRFDQLFDDESDPFEVLK', 'PGHLQEGFGCVVTNR'	0.0111192	-
SF3B5'	C76	9	1	MLQPCGPPADKPEEN'	0.0961924	-
SGPP1'	C27	6	1	LCGVEAPPRR'	0.106523	-
SGPP1'	C76	1	1	NQCPAKPDGGGAPNGVR'	0.196424	-
SGTA'	C129	4	1	AIELNPANAVYFCNR'	0.107521	-
SGTA'	C148	4	1	LGNYAGAVQDCER'	0.119797	-
SH3GLB2'	C267	1	1	SQTTYYAQCYR'	-0.00320179	-
SHC1'	C306	3	1	QMPPPPPCPAGR'	-0.120854	-
SHMT2'	C412	5	1	VLELVSITANKNTCPGDR'	0.124291	-
SHROOM3'	C1316	1	1	AIGDSSVPSECPGTLDHQR'	0.190201	-
SLC25A24'	C311	1	1	TGQYSGIYDCAK'	-2.52651	-
SLC25A5'	C257	4	2	KGTDIMYTGTLDCWRK', 'KGTDIMYTGTLDCWR'	0.186479	-
SLC3A2'	C432	7	1	WCSWSLSQAR'	0.115109	-
SLC4A1AP'	C730	3	1	TTSLCAGPSASKNEYEK'	0.115352	-
SLC4A1AP'	C723	2	1	ETQTHENMSQLSEEEQNKDYQDCSK'	0.886832	-
SLC9A3R1'	C206	7	1	IVEVNGVCMEGK'	0.047493	-
SLC9A3R2'	C271	21	2	VTPTEEHVEGPLPSPVTNGTSPAQLNGGSACSSR', 'LRVTPTEEHVEGPLPSPVTNGTSPAQLNGGSACSSR'	0.160123	-
SLITRK4'	C361	1	1	THPSDLGLSVNCQEK'	0.141744	-
SMARCC1'	C761	5	3	VDPTYGLESSCIAGTGPDEPEKLEGAEEEK', 'ASGKVDPTYGLESSCIAGTGPDEPEK', 'ASGKVDPTYGLESSCIAGTGPDEPEKLEGAEEEK'	0.365244	-
SMARCC1', 'SMARCC2'	C511	2	1	LNPQEYLTSTACRR'	0.0896695	-
SMC1A'	C1115	3	1	NSSAQAFLGPENPEEPYLDGINYNCVAPGKR'	0.121978	-
SMNDC1'	C214	13	2	VGVGTCGIADKPMTQYQDTSK', 'VGVGTCGIADKPMTQYQDTSKYNVR'	0.0819712	-
SNRPD2'	C46	7	1	NNTQVLINCR'	0.23527	-
SOD1'	C112	34	2	HVGDLGNVTADKDGVADVSIEDSVISLSGDHCIIGR', 'DGVADVSIEDSVISLSGDHCIIGR'	-0.12897	-
SOD1'	C7	8	1	AVCVLKGDGPVQGIINFEQK'	-0.122224	-
SOD1'	C58	9	1	GLTEGLHGFHVHEFGDNTAGCTSAGPHFNPLSR'	0.0759869	-
SOD1'	C147	1	1	TGNAGSRLACGVIGIAQ'	0.107733	-
SPAG7'	C191	3	2	TYGCVPVANKR', 'DAAHMLQANKTYGCVPVANKR'	0.755137	-
SPAST'	C220	1	1	SQTDVYNDSTNLACR'	0.126196	-
SPATS2'	C356	1	1	FTCDVETLKK'	0.421983	-
SPATS2L'	C111	1	1	DKVERPEAGPLQPQPPQIQNGPMNGCEK'	-0.10481	-
SPG20'	C405	1	1	AKDTSSEEVNLSHIVPCEPVPEEKPK'	-0.145874	-
SPHK1'	C49	4	1	GPAAAGNDAGAPAATAPGGEGEPHSRPCDAR'	0.151743	-
SPTAN1'	C1930	6	3	VNDVCTNGQDLIKK', 'VNDVCTNGQDLIK', 'DRVNDVCTNGQDLIK'	-0.122665	-
SPTAN1'	C1454	3	1	DCEQAENWMAAR'	0.158977	-
SPTAN1'	C1314	3	2	CTELNQAWSSLGKR', 'CTELNQAWSSLGK'	0.185146	-
SQSTM1'	C128	1	1	NMVHPNVICDGCNGPVVGTR'	0.0914867	-
SQSTM1'	C289	2	1	SSSQPSSCCSDPSKPGGNVEGATQSLAEQMR'	0.106766	-
SR140'	C65	3	1	ESLCDSPHQNLSRPLLENK'	-0.0282544	-
SRI'	C57	2	1	CLTQSGIAGGYKPFNLETCR'	0.00194326	-
SRP14'	C56	3	1	KGTVEGFEPADNKCLLR'	-0.364247	-
SRP19', 'unresolved: gi|323510696|ref|NP_001191122.1|', 'unresolved: gi|323510698|ref|NP_001191123.1|', 'unresolved: gi|323510705|ref|NP_001191128.1|'	C17	1	1	FICIYPAYLNNKK'	0.23778	-
SRP19', 'unresolved: gi|323510698|ref|NP_001191123.1|'	C94	1	1	QEDGSLCLVQFPSRK'	0.111032	-
SRPRB'	C246	3	1	VEFLECSAK'	-0.178668	-
SRRM2'	C2130	1	1	CRSPGMLEPLGSSR'	0.126909	-
SRRM2'	C1016	10	2	VKAQTPPGPSLSGSKSPCPQEK', 'AQTPPGPSLSGSKSPCPQEK'	0.163715	-
SRSF1'	C148	7	2	EAGDVCYADVYRDGTGVVEFVR', 'EAGDVCYADVYR'	0.090327	-
SRSF3'	C72	2	1	ELDGRTLCGCR'	-0.182462	-
SRSF3'	C6	2	1	DSCPLDCKVYVGNLGNNGNKTELER'	0.198755	-
SRSF5'	C63	1	1	DADDAVYELDGKELCSER'	-0.221477	-
SRSF7'	C73	2	1	DAEDAVRGLDGKVICGSR'	0.0238715	-
SRXN1'	C99	1	1	GAQGGDYFYSFGGCHR'	-0.00215014	-
SSB'	C18	10	1	ICHQIEYYFGDFNLPR'	0.118327	-
SSSCA1'	C125	7	1	EHQLASASELPLGSRPAPQPPVPRPEHCEGAAAGLK'	0.108942	-
ST13'	C209	8	1	LLGHWEEAAHDLALACK'	0.141061	-
ST13'	C16	47	1	MCKQDPSVLHTEEMR'	0.166798	-
STIP1'	C62	6	2	AYEDGCKTVDLKPDWGK', 'AYEDGCKTVDLKPDWGKGYSR'	-1.70244	-
STIP1'	C278	4	1	ELDPTNMTYITNQAAVYFEKGDYNKCR'	-0.513531	-
STIP1'	C417	2	1	DCEECIQLEPTFIKGYTRK'	-0.499199	-
STIP1'	C370	29	1	NKGNECFQKGDYPQAMK'	-0.220063	-
STIP1'	C26	15	2	ALSVGNIDDALQCYSEAIKLDPHNHVLYSNR', 'ALSVGNIDDALQCYSEAIK'	0.0663418	-
STIP1'	C282	6	2	ELCEKAIEVGRENR', 'ELCEKAIEVGR'	0.175412	-
STIP1'	C461	19	2	AMDVYQKALDLDSSCKEAADGYQR', 'ALDLDSSCKEAADGYQR'	0.186255	-
STIP1'	C339	4	1	CQQAEKILKEQER'	0.219913	-
STRAP'	C340	4	1	IGFPETTEEELEEIASENSDCIFPSAPDVK'	0.093585	-
STRAP'	C305	3	1	CVLPEEDSGELAKPK'	0.540699	Yes
STUB1'	C48	6	1	KYPEAAACYGR'	0.106612	-
STUB1'	C232	1	1	DIPDYLCGK'	0.109655	-
STX12'	C29	1	1	DFSSIIQTCSGNIQR'	0.202085	-
STX17'	C290	2	1	LTSSCPDLPSQTDKK'	0.23794	-
STX5'	C68	2	1	DRTQEFLSACK'	0.316599	-
STX7'	C28	1	1	ITQCSVEIQR'	0.131527	-
STX8'	C14	1	1	APDPWFSTYDSTCQIAQEIAEK'	0.251557	-
SUCLA2'	C430	1	1	ILACDDLDEAAR'	0.274381	-
SUCLG1'	C172	3	1	TRLIGPNCPGVINPGECK'	0.135277	-
SUCLG1'	C60	3	1	IICQGFTGK'	0.222961	-
SUGT1'	C49	2	1	ALEQKPDDAQYYCQR'	0.150072	-
SUMF2'	C225	3	1	MGNTPDSASDNLGFRCAADAGRPPGEL'	0.212821	-
SUMO3', 'SUMO2P7', 'SUMO2'	C47	1	1	AYCERQGLSMR'	0.132048	-
SUPT5H'	C740	1	1	VELHSTCQTISVDR'	0.115697	-
SURF6'	C189	2	1	KAEEATEAQEVVEATPEGACTEPR'	0.0915733	-
TACC1'	C114	1	1	TCSKPSENEVPQQAIDSHSVK'	0.00531023	-
TACC3'	C242	4	1	HGGVCAPAAVATSPPGAIPK'	0.0272637	-
TACC3'	C206	1	1	VTPASETLEDPCR'	0.0916136	-
TACC3'	C502	1	1	ALNSASTSLPTSCPGSEPVPTHQQGQPALELK'	0.661536	-
TADA3'	C7	2	1	DCPLQFHDFK'	-0.206146	-
TAF10'	C174	2	1	FISDIANDALQHCK'	0.121962	-
TAF1C'	C737	2	1	DTPGCATTPPHSQASSVR'	0.0865531	-
TALDO1'	C250	3	1	ALAGCDFLTISPK'	0.175173	Yes
TANC1'	C1611	3	1	LQCGENGPAHPLPSK'	0.0949081	-
TAPBP'	C115	4	1	WASGLTPAQNCPR'	0.0885485	-
TAPT1'	C474	1	1	LSNPPATCTPGKPSSK'	-0.0119031	-
TARDBP'	C50	13	1	YRNPVSQCMR'	0.10585	-
TBC1D15'	C677	3	1	NDSPTQIPVSSDVCR'	0.108103	-
TBC1D22A'	C151	4	1	SVSESHTSCPAESASDAAPLQR'	0.107012	-
TBCA'	C67	130	2	MMIPDCQRR', 'MMIPDCQR'	0.113318	-
TCEA2', 'TCEA1'	C261	4	1	TGGTQTDLFTCGK'	0.119663	-
TCEAL1'	C90	6	1	DLFEGRPPMEQPPCGVGK'	-0.0786489	-
TCERG1'	C535	3	1	AKPVATAPIPGTPWCVVWTGDER'	0.149865	-
TCOF1'	C935	5	1	SSSSESEDEDVIPATQCLTPGIR'	0.147653	-
TES'	C196	2	1	SEALGVGDVKLPCEMDAQGPK'	0.0510191	-
TES'	C164	3	1	QLPAHDQDPSKCHELSPR'	0.0969386	-
TFRC'	C353	17	2	LFGNMEGDCPSDWKTDSTCR', 'LFGNMEGDCPSDWK'	-0.310511	-
THEM4'	C46	6	1	DCSVPNPSWNKDLR'	0.139685	-
THUMPD1'	C57	2	1	KCVEEAYSLLNEYGDDMYGPEK'	-0.213536	-
TIMM10'	C50	1	1	EAELSKGESVCLDR'	-0.543467	-
TIMM9'	C48	1	1	EVKPEETTCSEHCLQK'	0.280417	-
TJP1'	C1620	2	1	GETLLSPLVMCGPHGLK'	0.121761	-
TK1'	C230	4	1	KLFAPQQILQCSPAN'	0.137078	-
TKT'	C468	1	1	GICFIR'	-0.07435	-
TLN1'	C1939	1	1	AGALQCSPSDAYTKK'	-0.724403	-
TLN1'	C1558	1	1	ALDGAFTEENRAQCR'	-0.13559	-
TLN1'	C1661	1	1	DKAPGQLECETAIAALNSCLR'	0.0278044	-
TLN1'	C1023	3	1	ASVPTIQDQASAMQLSQCAK'	0.0685991	-
TLN1'	C956	4	1	ASAGPQPLLVQSCK'	0.0845727	-
TLN1'	C2408	5	1	MVAAATNNLCEAANAAVQGHASQEK'	0.116343	-
TMEM106B'	C61	4	1	DSVTCPTCQGTGRIPR'	0.33448	-
TMEM214'	C177	2	1	ICIQAILQDKPK'	0.184527	-
TMEM30A'	C157	1	1	DDSQLNGDSSALLNPSKECEPYRR'	0.199708	-
TMPO'	C330	3	1	DIVENICGR'	0.010334	-
TMPO'	C341	5	2	EKSGIQPLCPER', 'SGIQPLCPER'	0.0606147	-
TMPO'	C254	3	1	EMFPYEASTPTGISASCR'	0.135551	-
TMX1'	C106	1	1	FIITALPTIYHCK'	0.244211	Yes
TNKS1BP1'	C1373	2	1	EHGVGGVSQCPEPGLR'	0.13517	-
TNKS1BP1'	C232	5	1	GWSQEGPVKSPAECR'	0.289774	-
TNKS1BP1'	C716	1	1	DTQSPSTCSEGLLGWSQK'	0.3696	-
TNS3'	C888	2	1	SCPETLTHAVGMSESPIGPK'	0.0619847	-
TOE1'	C371	4	1	DGPPKKQVCGDSIKPEETEQEVAADETR'	-0.0578318	-
TOMM34'	C74	3	2	DCTSALALVPFSIKPLLRR', 'DCTSALALVPFSIKPLLR'	0.0494722	-
TOMM34'	C250	10	2	DCTEALKLDGK', 'DCTEALKLDGKNVK'	0.216347	-
TOR1AIP1'	C424	4	1	CLSEQIADAYSSFR'	0.124356	-
TPI1'	C42	19	3	QSLGELIGTLNAAKVPADTEVVCAPPTAYIDFAR', 'KQSLGELIGTLNAAKVPADTEVVCAPPTAYIDFAR', 'VPADTEVVCAPPTAYIDFAR'	-0.3175	-
TPI1'	C87	20	2	DCGATWVVLGHSERR', 'DCGATWVVLGHSER'	0.115513	-
TPI1'	C218	28	1	IIYGGSVTGATCK'	0.119516	-
TPM2'	C36	2	1	CKQLEEEQQALQKK'	0.0441359	-
TPM3'	C226	3	1	TIDDLEDKLKCTK'	0.872349	-
TPM4'	C154	2	1	CGDLEEELKNVTNNLK'	-0.427007	-
TRAFD1'	C476	3	1	STSGPRPGCQPSSPCVPK'	0.138653	-
TRIAP1'	C37	7	2	FLKGDSSGDPCTDLFKR', 'FLKGDSSGDPCTDLFK'	0.517279	-
TRIM16'	C178	1	1	DKEAELQCTQLDLER'	-0.283039	-
TRIM39', 'unresolved: gi|312283723|ref|NP_001186048.1|'	C157	1	1	CLEPLEQKLQEITR'	-0.0305999	-
TRIP13'	C14	1	1	QALPCVAESPTVHVEVHQR'	0.139535	-
TRMT1'	C620	3	1	GDQCCYSHSPPTPR'	0.15992	-
TRMT112'	C33	2	1	ICPVEFNPNFVAR'	0.130845	-
TSEN15'	C13	1	1	GDSEPTPGCSGLGPGGVR'	0.150935	-
TSSC4'	C99	2	1	SRDIFDCLEGAAR'	-0.0130004	-
TTC1'	C8	2	1	SENCGVPEDLLNGLKVTDTQEAECAGPPVPDPK'	-0.661749	-
TTC1'	C28	1	1	VTDTQEAECAGPPVPDPK'	0.29995	-
TTC15'	C160	1	1	EVPGSEAARPEQEPPVAEPVPVCTIFSQR'	0.282871	-
TTC38'	C367	2	1	DASESPGENCQHLLAR'	0.131293	-
TTC4'	C63	1	1	ENPDLACLQSIIFDEER'	0.104399	-
TTF2'	C224	2	1	SQQCQGNELTRPSASSQEK'	0.144679	-
TUBB2A', 'TUBB2B', 'TUBB', 'TUBB3'	C12	17	2	MREIVHIQAGQCGNQIGAK', 'EIVHIQAGQCGNQIGAK'	0.0678408	-
TUBB2A', 'TUBB2B', 'TUBB', 'TUBB8'	C354	8	1	TAVCDIPPRGLK'	-0.0881469	-
TXLNG'	C480	1	1	DLATPVMQPCTALDSHK'	0.0980558	-
TXLNG'	C101	3	1	NLVSPAYCTQESR'	0.164861	-
TXNDC5'	C217	2	1	FFAPWCGHCK'	0.00719285	-
TXNDC5'	C350	9	1	FYAPWCGHCK'	0.136229	-
TXNDC5'	C247	1	1	VDCTQHYELCSGNQVR'	0.142991	-
TXNDC5'	C121	2	1	VDCTAHSDVCSAQGVR'	0.144324	-
U2AF2'	C429	4	1	SIEIPRPVDGVEVPGCGK'	0.0791962	-
UACA'	C839	2	1	KMMSNQYVPVKTHEEVK'	-1.83836	-
UBA1'	C632	6	1	SIPICTLK'	0.12329	Yes
UBA1'	C234	4	1	DNPGVVTCLDEAR'	0.323352	Yes
UBA1'	C23	19	2	VSGPDPKPGSNCSPAQSVLSEVPSVPTNGMAK', 'RVSGPDPKPGSNCSPAQSVLSEVPSVPTNGMAK'	0.182256	-
UBA2'	C173	4	1	TFPGCTIR'	0.0720497	-
UBA2'	C185	3	1	NTPSEPIHCIVWAK'	0.22915	-
UBA3'	C28	1	1	MAVDGGCGDTGDWEGR'	0.13453	-
UBAP2L'	C68	2	1	NQDECVIALHDCNGDVNR'	0.145676	-
UBE2I'	C75	2	1	MLFKDDYPSSPPKCK'	-0.15793	-
UBE2L3'	C86	5	1	GQVCLPVISAENWKPATK'	0.405309	-
UBE2L3'	C137	2	1	FCKNAEEFTK'	0.941039	-
UBE2M'	C65	1	1	LVICPDEGFYK'	0.605223	-
UBE2O'	C370	1	1	IAWECPEK'	0.270621	-
UBE2V2'	C69	6	1	VECGPKYPEAPPSVR'	0.119895	-
UBR5', 'LOC730429'	C51	4	1	QCVVGPNHAAFLLEDGR'	0.0850012	-
UBXN4'	C186	3	1	SDTATGGESAGHATSSQEPSGCSDQRPAEDLNIR'	0.138596	-
UCHL3'	C95	3	1	QTISNACGTIGLIHAIANNKDK'	0.25952	-
UCK2'	C241	6	1	QTNGCLNGYTPSR'	0.0600927	-
UIMC1', 'unresolved: gi|313151224|ref|NP_001186226.1|', 'unresolved: gi|313151226|ref|NP_001186227.1|'	C121	2	1	AIAESLNSCRPSDASATR'	0.140349	-
unresolved: gi|332164775|ref|NP_001193725.1|'	C17	1	1	LLTPGACSSEVPSAVPSR'	0.132966	-
unresolved: gi|332164775|ref|NP_001193725.1|', 'LOC652797', 'unresolved: gi|332164777|ref|NP_001193726.1|', 'unresolved: gi|332164781|ref|NP_001193728.1|', 'PKM2'	C123	3	1	NTGIICTIGPASR'	0.104278	-
unresolved: gi|333440449|ref|NP_055912.2|', 'unresolved: gi|333440451|ref|NP_001193973.1|'	C762	1	1	IPRPSVSQGCSR'	0.103081	-
UQCRH'	C67	14	1	SHTEEDCTEELFDFLHAR'	0.101706	-
USP10'	C254	7	1	TAGQPEGGPGADFGQSCFPAEAGR'	0.00946305	-
VAPA'	C128	2	1	CVFEMPNENDKLNDMEPSK'	-0.221068	-
VAPB'	C41	3	1	LGNPTDRNVCFK'	0.110305	-
VARS'	C41	5	1	ICLQPPPTSR'	0.10594	Yes
VASP'	C334	7	2	SSSSVTTSETQPCTPSSSDYSDLQR', 'MKSSSSVTTSETQPCTPSSSDYSDLQR'	-0.304518	-
VAT1'	C86	3	1	ACGLNFADLMAR'	0.164432	-
VCL'	C985	4	1	IRTNLLQVCER'	0.115877	-
VCP'	C105	3	1	VRLGDVISIQPCPDVK'	0.0416818	-
VCP'	C691	5	1	MTNGFSGADLTEICQR'	0.167064	-
VDAC1'	C232	4	1	YQIDPDACFSAK'	0.141347	-
VIM'	C328	1	1	QVQSLTCEVDALKGTNESLER'	0.933218	-
VPS18'	C22	1	1	SAVLQPGCPSVGIPHSGYVNAQLEK'	0.524353	-
VPS28'	C60	3	1	AYIKDCVSPSEYTAACSR'	0.120627	-
VPS28'	C96	1	1	QVQGSEISSIDEFCRK'	0.30413	-
WHSC1'	C406	1	1	LCSSAETLESHPDIGK'	-0.436041	-
WHSC2'	C482	1	1	ENPCQEQGDVIQIK'	0.20021	-
WRNIP1'	C39	1	1	CLLLHPAGHAEPAAGSHR'	0.174367	-
XPO1'	C34	1	1	LDINLLDNVVNCLYHGEGAQQR'	0.0495716	-
XPO5'	C1157	4	2	LIAGCIGKPLGEQFRK', 'LIAGCIGKPLGEQFR'	0.281493	-
XPOT'	C650	4	1	QASLADCLNHAVGFASR'	0.122713	-
YRDC'	C121	1	1	SEAKPLAVCLGR'	0.0779197	-
YWHAQ'	C134	5	2	YLAEVACGDDRK', 'YLAEVACGDDR'	0.128668	Yes
YWHAQ'	C25	4	1	YDDMATCMK'	-0.111971	-
YWHAZ'	C25	89	1	YDDMAACMK'	0.190452	-
ZC3H8'	C82	1	1	SKDYDVYSDNDICSQESEDNFAK'	0.386603	-
ZC3HAV1'	C272	5	1	SCTPSPDQISHR'	0.0499614	-
ZCCHC8'	C607	3	1	SEAGHASSPDSEVTSLCQK'	0.0932829	-
ZFAND3'	C118	1	1	SCGTDSQSENEASPVKRPR'	0.206501	-
ZFP36'	C249	1	1	RDPTPVCCPSCR'	0.0780256	-
ZNF598'	C610	8	1	VGSEKPGTTLPQPPPATCPPGALQAPEAPASR'	0.0180912	-
ZNF598'	C864	2	1	SAWQATTQQAGLDCR'	0.145971	-
ZRANB2'	C15	9	1	VSDGDWICPDKK'	0.0454586	-
ZRANB2'	C71	3	1	GLFSANDWQCK'	1.00902	-
ZYX'	C384	1	1	QNVAVNELCGR'	0.115638	-

## Sheet: JZ128,JZ128-DTB Comparison
Supplementary Table S4. JZ128/JZ128-DTB Reactivity Comparisons.
Quantitative comparison of compound reactivity differences for enriched cysteine peptides.
Cysteine sites also detected as JZ128-DTB modified in CITe-Id experiments are noted.
GeneName	Cysteine Site	# PSM(s)	# Peptide(s)	Peptide(s)	Reactivity Difference (log2 JZ128/JZ128-DTB)	Modified in CITe-Id? (JZ128-DTB)
ABCF3'	C102	2	1	ITENYDCGTKLPGLLKR'	0.832565	-
ACAA1'	C218	1	1	GCFQAEIVPVTTTVHDDKGTKR'	-0.00511891	-
ACAA1'	C177	6	2	ARDCLIPMGITSENVAER', 'DCLIPMGITSENVAER'	0.0665333	-
ACAD9'	C613	4	1	AYICAHPLDR'	-0.0344237	-
ACAT1'	C196	6	1	DGLTDVYNKIHMGSCAENTAK'	0.174082	-
ACAT1'	C119	7	2	QAVLGAGLPISTPCTTINKVCASGMK', 'QAVLGAGLPISTPCTTINK'	-0.486076	Yes
ACIN1'	C546	1	1	GITEECLKQPSLEQK'	0.0705823	-
ACIN1'	C691	2	1	DSSTSYTETKDPSSGQEVATPPVPQLQVCEPK'	0.396328	-
ACO2'	C126	4	1	VAVPSTIHCDHLIEAQVGGEK'	0.117917	-
ACP1'	C63	6	2	VDSAATSGYEIGNPPDYRGQSCMK', 'VDSAATSGYEIGNPPDYRGQSCMKR'	0.108391	-
ACTR2'	C11	8	2	KVVVCDNGTGFVK', 'VVVCDNGTGFVK'	-0.988323	-
AFAP1'	C684	2	1	TLENSPISSCDTSDTEGPVPVNSAAVLKK'	0.494251	-
AHNAK'	C5502	9	2	SSGCDVNLPGVNVK', 'SSGCDVNLPGVNVKLPTGQISGPEIK'	0.100778	-
AHNAK'	C1900	1	1	LEGDLTGPSVGVEVPDVELECPDAK'	0.16539	-
AHNAK'	C2806	13	2	ADIDVSGPKVDVECPDVNIEGPEGK', 'VDVECPDVNIEGPEGK'	0.104587	Yes
AIFM1'	C256	3	1	CLIATGGTPR'	0.0268143	-
AK2', 'unresolved: gi|312836806|ref|NP_001186128.1|'	C92	9	1	NLETPLCK'	-0.311036	-
AK4', 'LOC100507855'	C22	4	1	AVILGPPGSGKGTVCQR'	0.0969619	-
AKAP1', 'unresolved: gi|339275974|ref|NP_001229831.1|', 'unresolved: gi|339275976|ref|NP_001229832.1|'	C147	3	1	SIPLECPLSSPK'	-0.301879	-
AKAP1', 'unresolved: gi|339275974|ref|NP_001229831.1|', 'unresolved: gi|339275976|ref|NP_001229832.1|'	C64	5	1	ADPAIKEPLPVEDVCPK'	-0.218009	-
ALDH7A1', 'unresolved: gi|319655561|ref|NP_001188306.1|', 'unresolved: gi|320202964|ref|NP_001189333.1|'	C70	5	1	GEVITTYCPANNEPIAR'	0.0781367	-
ALDH9A1'	C69	1	1	VIATFTCSGEK'	1.34808	-
ALDOA'	C339	2	1	ALANSLACQGK'	1.82348	Yes
ALDOA', 'ALDOC'	C178	4	1	YASICQQNGIVPIVEPEILPDGDHDLKR'	0.152264	-
ANAPC7'	C131	2	1	VRPSTGNSASTPQSQCLPSEIEVK'	-0.0768962	-
ANKHD1-EIF4EBP3', 'ANKHD1'	C213	2	1	SLAEACSDGDVNAVRK'	-0.150298	-
ANKRD40'	C209	4	1	TPESTKPGPVCQPPVSQSR'	-0.033035	-
ANLN'	C71	2	1	CSDNTEVEVSNLENKQPVESTSAK'	-0.297539	-
ANLN'	C234	4	1	QNSVQEQPGTACLSK'	-0.000779691	-
ANLN'	C309	4	1	SCEGQNPELLPK'	0.0350233	-
ANXA1'	C270	4	1	CATSKPAFFAEK'	2.20544	-
ANXA11'	C384	3	1	FNAVLCSR'	0.0125031	-
ANXA11'	C226	2	1	GFGTDEQAIIDCLGSR'	-0.0821113	Yes
ANXA2'	C133	6	2	ASMKGLGTDEDSLIEIICSR', 'GLGTDEDSLIEIICSR'	0.00141263	Yes
ANXA7'	C305	2	1	LLVSMCQGNR'	-0.00339245	Yes
AP1B1'	C914	2	1	IQPGNPSCTLSLK'	0.0205222	-
AP1B1'	C859	4	2	DCPLNAEAASSKLQSSNIFTVAK', 'DCPLNAEAASSKLQSSNIFTVAKR'	0.168265	-
APEX1'	C93	4	1	EEAPDILCLQETK'	-0.0349678	-
APEX1'	C99	5	1	CSENKLPAELQELPGLSHQYWSAPSDK'	0.389464	-
APEX1'	C65	5	1	ICSWNVDGLR'	0.0881275	Yes
ARFGAP1'	C351	4	2	KSPSSDSWTCADTSTER', 'KSPSSDSWTCADTSTERR'	-0.063316	-
ARL6IP1'	C109	2	1	FHEICSNLVK'	-0.263143	-
ASPH'	C648	3	1	TCTLLEKFPETTGCR'	-0.263612	-
ATG9A'	C764	1	1	SASYPCAAPRPGAPETTALHGGFQR'	0.210306	-
ATL2'	C402	4	1	SMEQVCGGDKPYIAPSDLER'	-0.046953	Yes
ATL3'	C371	6	1	DIYYNNMEEVCGGEKPYLSPDILEEK'	0.174824	Yes
ATOX1'	C41	4	2	VCIESEHSMDTLLATLK', 'VCIESEHSMDTLLATLKK'	-0.882121	-
ATP1A1'	C211	5	1	IISANGCKVDNSSLTGESEPQTR'	-0.0629278	-
ATP1B1'	C213	5	1	YNPNVLPVQCTGKR'	-0.020706	-
ATP1B3'	C191	7	1	IDCVSKNEDIPNVAVYPHNGMIDLK'	-0.123202	-
ATP5H'	C101	7	1	SCAEWVSLSK'	-0.322107	-
ATP6V1A'	C138	2	1	DIKWDFTPCK'	2.98924	-
ATXN2'	C852	1	1	DSFIENSSSNCTSGSSKPNSPSISPSILSNTEHK'	-1.74457	-
ATXN2'	C892	6	2	RGPEVTSQGVQTSSPACK', 'RGPEVTSQGVQTSSPACKQEK'	0.0176026	-
ATXN2L'	C58	4	1	RPPGGTSPPNGGLPGPLATSAAPPGPPAAASPCLGPVAAAGSGLR'	0.143093	-
ATXN2L'	C628	2	1	TESVSDKEDKPPLAPSGGTEGPEQPPPPCPSQTGSPPVGLIK'	0.950124	-
B2M'	C45	2	1	SNFLNCYVSGFHPSDIEVDLLK'	-0.149324	-
BAG3'	C373	3	1	VEVKVPPAPVPCPPPSPGPSAVPSSPK'	-0.075464	-
BAG3'	C151	8	2	QCGQVAAAAAAQPPASHGPER', 'GMPETTQPDKQCGQVAAAAAAQPPASHGPER'	0.00599505	-
BAG3'	C179	6	1	SQSPAASDCSSSSSSASLPSSGR'	0.0456785	-
BANF1'	C67	7	1	EWLKDTCGANAK'	-0.64225	-
BANF1'	C77	1	1	DCFGCLR'	0.247723	-
BAT1'	C165	5	1	NCPHIVVGTPGR'	-0.00417524	-
BCL9L'	C68	1	1	TGNGGAQSQHQNVNQGPTCNVGSK'	0.185052	-
BCLAF1', 'LOC731605'	C242	6	1	SPHSPSPIATPPSQSSSCSDAPMLSTVHSAK'	-0.186702	-
BET1'	C28	3	1	RAGLGEGVPPGNYGNYGYANSGYSACEEENER'	-0.068164	Yes
BOD1L'	C2438	1	1	ECPEIGPFAGR'	0.0801863	-
BRD7'	C338	3	1	RLVNSQCEFER'	0.0105372	-
BSG'	C242	30	1	SSEHINEGETAMLVCK'	-0.0236079	Yes
BTF3'	C22	8	2	GGCPGGEATLSQPPPR', 'GGCPGGEATLSQPPPRGGTR'	-0.0577431	-
C10orf46'	C362	1	1	KRAGDELAYNSSSACASSR'	0.0997046	-
C12orf57'	C73	3	1	AYGFSCDGEGVLK'	-0.0396059	-
C14orf156'	C48	12	3	CILPFDK', 'CILPFDKETGFHR', 'RCILPFDK'	-0.43014	-
C14orf166'	C69	7	3	DVNCPFKIQDR', 'YLRDVNCPFK', 'YLRDVNCPFKIQDR'	0.374007	-
C15orf23'	C217	3	1	FRDNCLAILESK'	0.0554861	-
C16orf61'	C37	5	2	FFGYCNDVDR', 'FFGYCNDVDRELRK'	0.0598287	-
C16orf88'	C172	3	1	KGAQDPTAFSVQDPWFCEAR'	-0.431051	-
C16orf88'	C78	2	1	GVSTLCEEHVEPETTLPAR'	0.0157401	-
C17orf49'	C66	1	1	FGDDLNHISCVIK'	-0.136181	Yes
C17orf56'	C493	1	1	LVGAGAAAGESCPDAPRAPQTSSQR'	0.0798373	-
C17orf59'	C176	2	1	SLDGLSEACGGAGSSGSAESGAGGGRR'	0.0228053	-
C18orf32', 'unresolved: gi|313569786|ref|NP_001186275.1|'	C71	3	1	GADMNGLPTKGPTEICDK'	1.04497	-
C1orf163'	C179	4	1	ACDLGHIWACANASR'	-0.0366477	-
C1orf31', 'unresolved: gi|331284144|ref|NP_001193570.1|'	C68	8	2	DEYWKCLDENLEDASQCKK', 'DEYWKCLDENLEDASQCK'	-0.875275	-
C20orf3'	C149	15	2	DDEPVCGRPLGIR', 'TRDDEPVCGRPLGIR'	0.0293101	-
C21orf33'	C153	3	1	NLSTFAVDGKDCK'	-0.0766914	-
C21orf59'	C83	1	1	CVPSGGAVFKK'	-1.38634	-
C5orf33'	C148	3	1	SSGLNLCTGTGSK'	-0.0705464	-
C6orf108'	C26	8	1	GEPGRPALYFCGSIR'	-0.00734859	-
CACYBP'	C154	1	1	VKTDTVLILCR'	-0.421231	-
CAD'	C1889	11	1	KVAEPELMGTPDGTCYPPPPVPR'	-0.0634475	-
CAND1'	C131	6	1	TVIGELPPASSGSALAANVCKK'	-0.42206	-
CAND1'	C1153	1	1	LVEPLRATCTTK'	-0.0627963	-
CANX'	C360	12	2	CESAPGCGVWQRPVIDNPNYKGK', 'CESAPGCGVWQRPVIDNPNYK'	-0.240194	-
CAPZB', 'unresolved: gi|330864679|ref|NP_001193469.1|', 'unresolved: gi|330864681|ref|NP_001193470.1|'	C62	12	3	DKVVGKDYLLCDYNR', 'DYLLCDYNRDGDSYR', 'DYLLCDYNR'	-1.71863	-
CAPZB', 'unresolved: gi|330864679|ref|NP_001193469.1|', 'unresolved: gi|330864681|ref|NP_001193470.1|'	C206	11	2	QMEKDETVSDCSPHIANIGR', 'DETVSDCSPHIANIGR'	0.0526112	-
CAST'	C219	11	4	EGITGPPADSSKPIGPDDAIDALSSDFTCGSPTAAGK', 'KEGITGPPADSSKPIGPDDAIDALSSDFTCGSPTAAGK', 'KEGITGPPADSSKPIGPDDAIDALSSDFTCGSPTAAGKK', 'EGITGPPADSSKPIGPDDAIDALSSDFTCGSPTAAGKK'	-1.28018	-
CAST'	C639	7	3	KPADDQDPIDALSGDLDSCPSTTETSQNTAK', 'SEDSKKPADDQDPIDALSGDLDSCPSTTETSQNTAKDK', 'SEDSKKPADDQDPIDALSGDLDSCPSTTETSQNTAK'	1.83082	-
CAST'	C386	3	1	AAAPAPVSEAVCR'	-0.0166447	Yes
CAT'	C377	3	1	LGPNYLHIPVNCPYR'	0.0240392	-
CBR4'	C55	1	1	AAAGDLGGDHLAFSCDVAK'	0.0834489	-
CBS'	C15	6	2	PSETPQAEVGPTGCPHRSGPHSAK', 'PSETPQAEVGPTGCPHR'	0.0381354	-
CCBL1'	C280	1	1	TVHQNSVFHCPTQSQAAVAESFER'	-0.153264	-
CCDC50'	C85	3	1	YKDLEQQDCEIAQEIQEK'	0.044403	-
CCDC58'	C24	4	1	TIDDRIVHELNTTVPTASFAGK'	0.156814	-
CCDC58'	C74	4	2	DRVIKNCIAQTSAVVK', 'VIKNCIAQTSAVVK'	1.25282	-
CCDC86'	C127	1	1	CSQDQGVLASELAQNK'	0.0595252	-
CCDC94'	C275	7	3	AKADPDCSNGQPQAAPTPGAPQNRK', 'ADPDCSNGQPQAAPTPGAPQNRK', 'AKADPDCSNGQPQAAPTPGAPQNR'	0.173121	-
CCT2', 'unresolved: gi|311771535|ref|NP_001185771.1|'	C289	2	1	HGINCFINR'	0.0124941	-
CCT3'	C175	9	1	VEKIPGGIIEDSCVLR'	-0.0604203	-
CCT3'	C360	4	1	NLQDAMQVCR'	0.0213635	-
CCT3'	C417	3	1	TLIQNCGASTIR'	-0.0102206	Yes
CCT5'	C493	15	2	EMNPALGIDCLHK', 'EMNPALGIDCLHKGTNDMK'	-0.29328	Yes
CCT5'	C253	14	1	IAILTCPFEPPKPK'	0.171255	Yes
CCT6A'	C282	2	1	VCGDSDKGFVVINQK'	-0.671341	-
CCT7'	C364	1	1	YNFFTGCPK'	-0.061081	Yes
CCT7'	C450	7	2	QLCDNAGFDATNILNK', 'QLCDNAGFDATNILNKLR'	-0.0555517	Yes
CCT7'	C29	2	1	EGTDSSQGIPQLVSNISACQVIAEAVR'	-0.011204	Yes
CCT8'	C325	1	1	LCKTVGATALPR'	-0.211406	-
CCT8'	C36	5	1	NIQACKELAQTTR'	0.0543764	-
CCT8'	C440	3	1	FAEAFEAIPR'	0.308548	-
CCT8'	C430	7	2	QITSYGETCPGLEQYAIKK', 'QITSYGETCPGLEQYAIK'	-0.27849	Yes
CD151'	C184	2	1	VVPDSCCKTVVALCGQR'	-0.0571067	Yes
CD320'	C67	3	1	TSGLCVPLTWR'	0.0651695	-
CD3EAP'	C14	11	1	FSCPPNFTAKPPASESPR'	-0.0775464	-
CD3EAP'	C86	2	1	YRVLSSCPQAGEATLLAPSTEAGGGLTCASAPQGTLR'	-0.049573	-
CD3EAP'	C150	1	1	FCAFGGNPPVTGPR'	-0.0101468	-
CD59'	C70	5	1	FEHCNFNDVTTR'	0.0119881	Yes
CDC37'	C336	1	1	CIDSGLWVPNSK'	-2.51498	-
CDC42'	C105	1	1	WVPEITHHCPK'	0.175474	-
CDKAL1'	C538	2	1	NGLGNQLSSGSHTSAASQCDSASSR'	-0.0320322	-
CFL1'	C139	46	5	LTGIKHELQANCYEEVK', 'HELQANCYEEVK', 'LTGIKHELQANCYEEVKDR', 'KLTGIKHELQANCYEEVK', 'HELQANCYEEVKDR'	-0.288868	Yes
CFL1'	C39	2	1	KAVLFCLSEDKK'	0.75903	Yes
CGA'	C59	12	1	AYPTPLR'	-0.0267242	-
CHCHD3'	C183	5	1	YESHPVCADLQAK'	0.0170713	Yes
CHCHD5'	C22	1	1	ELEQYGQCVAAKPESWQR'	-0.15769	-
CHCHD7'	C41	4	1	LRDPDINPCLSESDASTR'	-0.000399881	-
CHCHD8'	C54	15	2	QCQPQVQAFK', 'QCQPQVQAFKDCMSEQQAR'	-0.00307071	-
CHD3'	C1464	6	1	HLCEPGADGSETFADGVPR'	0.0493019	-
CHD4'	C1594	1	1	STAPETAIECTQAPAPASEDEK'	0.126767	-
CHD5', 'CHD4'	C1476	2	1	HLCEPGADGAETFADGVPR'	-0.0435754	-
CHMP5'	C20	7	1	AKPKAPPPSLTDCIGTVDSR'	-0.153206	-
CHORDC1'	C24	5	1	FDPETNSDDACTYHPGVPVFHDALK'	-0.0474361	-
CIAPIN1'	C249	4	1	NCTCGLAEELEK'	-0.159969	-
CISD1'	C83	3	2	SKKFPFCDGAHTK', 'KFPFCDGAHTK'	0.378708	-
CISD2'	C92	2	2	VVNEINIEDLCLTK', 'ENPKVVNEINIEDLCLTK'	-1.03696	Yes
CIZ1'	C252	1	1	TPAPEPEPCEASELPAKR'	0.172631	-
CKAP5'	C1113	3	1	FQPASAPAEDCISSSTEPKPDPK'	-0.258425	-
CLIC1'	C191	3	2	LHIVQVVCKK', 'LHIVQVVCK'	-0.46381	-
CLIC1'	C24	6	1	IGNCPFSQR'	-0.00144072	-
CLIC4'	C234	9	2	DEFTNTCPSDKEVEIAYSDVAKR', 'DEFTNTCPSDKEVEIAYSDVAK'	-0.479034	Yes
CLIP1', 'CLIP2'	C242	5	2	GEWCGVELDEPLGKNDGAVAGTR', 'GEWCGVELDEPLGK'	-0.0410694	-
CLTB'	C181	6	1	VAQLCDFNPK'	0.24546	-
CLTC'	C870	1	1	IHEGCEEPATHNALAK'	0.301357	Yes
CMBL'	C222	1	1	EDCSPADKPYIDEARR'	-0.174897	-
CNBP'	C97	8	2	EQCCYNCGKPGHLAR', 'EREQCCYNCGKPGHLAR'	0.00267094	-
CNPY3'	C206	3	1	GKDTSCLAEQWSGK'	-0.525707	-
COG8'	C125	2	1	LLDRLPSFQQSCR'	-0.0435573	-
COG8'	C595	4	1	LEPAGPACPEGGR'	0.0231173	-
COL4A5', 'COL4A1'	C1509	1	1	AHGQDLGTAGSCLR'	0.041032	-
COMT'	C83	4	1	ILNHVLQHAEPGNAQSVLEAIDTYCEQK'	0.472284	-
CORO1B'	C475	1	1	ICRLEEQLGR'	-0.151716	-
COX17'	C23	4	1	PGLVDSNPAPPESQEKKPLKPCCACPETK'	-0.316596	-
COX6B1'	C30	8	1	NCWQNYLDFHR'	-0.0172913	Yes
CPD'	C195	1	1	EGDCGFGDGGPSGASGRDNSR'	-0.143936	-
CPNE3'	C249	3	1	SSPVEFECINEK'	0.149946	Yes
CPS1'	C920	5	1	CLGLTEAQTR'	-0.0338615	-
CPS1'	C816	20	1	MCHPSIEGFTPR'	-0.00713633	-
CPSF6'	C159	7	2	ELHGQNPVVTPCNK', 'RELHGQNPVVTPCNK'	-0.394564	-
CPSF6'	C476	4	1	VLISSLQDCLHGIESK'	-0.0331868	-
CRABP2', 'unresolved: gi|315013542|ref|NP_001186652.1|'	C82	5	1	VGEEFEEQTVDGRPCK'	-0.102366	-
CRIP1'	C7	13	1	CNKEVYFAER'	0.0638286	-
CRIP1'	C28	3	1	VTSLGKDWHRPCLK'	1.18792	-
CRIP2'	C126	3	1	ASSVTTFTGEPNTCPR'	-0.0476715	-
CRYZ'	C45	3	1	VHACGVNPVETYIR'	-0.0198648	-
CS'	C101	12	3	GFSIPECQK', 'FRGFSIPECQK', 'GFSIPECQKLLPK'	0.249866	-
CSE1L'	C344	2	1	NLFEDQNTLTSICEK'	0.0102392	Yes
CTSB'	C93	4	1	EQWPQCPTIK'	-0.646225	-
CTSB'	C211	6	1	ICEPGYSPTYKQDK'	0.440509	-
CTTN'	C246	5	1	CALGWDHQEK'	0.230927	-
DAK'	C382	1	1	VCSTLLGLEEHLNALDR'	0.044726	-
DAXX'	C720	1	1	LSQTPHSQPPRPGTCK'	0.0366534	-
DAZAP1'	C124	5	1	IFVGGIPHNCGETELR'	-0.0686656	-
DAZAP1'	C63	5	1	FKDPNCVGTVLASRPHTLDGR'	-0.0359523	-
DCTD'	C40	2	1	SKDPNSQVGACIVNSENK'	-0.408872	-
DCTPP1'	C110	5	1	CRVDLPLAVLSK'	-0.0578857	-
DCTPP1'	C162	6	2	KYTELPHGAISEDQAVGPADIPCDSTGQTST', 'YTELPHGAISEDQAVGPADIPCDSTGQTST'	-0.0252523	Yes
DCUN1D1'	C29	3	1	TAVSCLSQNDWK'	0.131392	-
DCXR'	C138	1	1	GVPGAIVNVSSQCSQR'	-0.0225435	-
DDX17'	C584	15	3	YRTTSSANNPNLMYQDECDRR', 'YRTTSSANNPNLMYQDECDR', 'TTSSANNPNLMYQDECDRR'	-0.0345833	-
DDX17', 'DDX5'	C277	5	1	LKSTCIYGGAPK'	-1.54376	-
DDX21'	C161	12	2	LKNGFPHPEPDCNPSEAASEESNSEIEQEIPVEQK', 'NGFPHPEPDCNPSEAASEESNSEIEQEIPVEQK'	0.00349532	-
DDX39'	C164	6	1	NCPHVVVGTPGR'	-0.0077819	-
DDX54'	C73	7	2	LGPGRPLPTFPTSECTSDVEPDTR', 'KLGPGRPLPTFPTSECTSDVEPDTR'	0.0189397	-
DDX59'	C60	1	1	HISESCPFPSPGGQLAEVHSVSPEQGAK'	0.318647	-
DFFA'	C21	3	1	TLKPCLLRR'	-0.181347	-
DFFA'	C38	5	1	EQHGVAASCLEDLR'	-0.0387638	-
DIAPH1'	C1227	3	1	KAGCAVTSLLASELTK'	0.594636	-
DIDO1'	C350	4	1	WRPGDADGTDCTSIGTIEQK'	-0.0749525	-
DIDO1'	C976	3	1	TAPSSSCTAVASAASRPDSTHMVEAR'	0.0229233	-
DLD'	C484	9	1	VCHAHPTLSEAFR'	0.00810671	-
DLG2', 'DLG3', 'DLG1', 'unresolved: gi|324120934|ref|NP_001191316.1|', 'unresolved: gi|324120936|ref|NP_001191315.1|', 'unresolved: gi|324120938|ref|NP_001191317.1|', 'unresolved: gi|332164718|ref|NP_001193698.1|'	C772	1	1	HCILDVSGNAIKR'	0.158124	-
DLGAP4'	C197	5	1	SLPDCTPHPNSISIDAGPR'	0.013995	-
DNAJB1'	C179	4	1	VSLEEIYSGCTKK'	-1.68661	-
DNAJC2'	C276	4	1	TLVDNAYSCDPR'	0.21219	-
DOCK4'	C1723	1	1	ERPCSAIYPTPVEPSQR'	-0.142562	-
DPYSL2'	C504	2	1	GLYDGPVCEVSVTPK'	0.0503634	-
DSP'	C57	9	1	RGVITDQNSDGYCQTGTMSR'	-6.5175e-05	-
DSTN'	C135	9	2	FQGIKHECQANGPEDLNR', 'KFQGIKHECQANGPEDLNR'	0.0135433	Yes
DTYMK'	C31	1	1	KLVEALCAAGHR'	-0.010555	-
DUS2L'	C475	1	1	AQELAQPGDLCK'	0.18399	-
DUT'	C3	10	1	PCSEETPAISPSKR'	-0.0179173	-
DUT'	C78	8	1	TDIQIALPSGCYGR'	0.0111285	-
DYNLL1'	C24	15	2	AVIKNADMSEEMQQDSVECATQALEK', 'NADMSEEMQQDSVECATQALEK'	-0.996301	Yes
DYNLL1', 'DYNLL2'	C56	6	1	YNPTWHCIVGR'	-0.0124425	-
EDC4'	C976	3	1	LCTQLEGLQSTVTGHVER'	-0.0130627	-
EEF1A1'	C411	240	2	SGDAAIVDMVPGKPMCVESFSDYPPLGR', 'FLKSGDAAIVDMVPGKPMCVESFSDYPPLGR'	-0.0480937	Yes
EEF1B2'	C50	7	1	SYIEGYVPSQADVAVFEAVSSPPPADLCHALR'	0.00866764	Yes
EEF1G'	C266	140	2	AAAPAPEEEMDECEQALAAEPK', 'KAAAPAPEEEMDECEQALAAEPK'	-0.143268	Yes
EEF2'	C591	5	1	ETVSEESNVLCLSK'	-0.16755	Yes
EEF2'	C41	5	1	STLTDSLVCK'	0.0410468	Yes
EGFR'	C977	3	1	YLVIQGDER'	-0.462267	-
EGFR'	C852	1	1	ITDFGLAK'	-0.182212	-
EGFR'	C686	3	1	ELVEPLTPSGEAPNQALLR'	-0.082614	-
EGFR'	C506	2	1	ATGQVCHALCSPEGCWGPEPR'	-0.0328491	-
EGFR'	C986	4	1	MHLPSPTDSNFYR'	0.642532	-
EGFR'	C879	4	1	WMALESILHR'	0.689196	-
EGFR', 'ERBB4', 'ERBB2'	C716	6	1	VLGSGAFGTVYK'	0.387268	-
EHBP1L1'	C221	2	1	TLCEEEEEGQGRPQQAVASPSNAEDTSPAPVSAPAPPAR'	0.0539821	-
EIF1B', 'EIF1'	C69	2	2	FACNGTVIEHPEYGEVIQLQGDQR', 'FACNGTVIEHPEYGEVIQLQGDQRK'	2.93069	-
EIF2B4'	C69	7	2	GAEPETGSAVSAAQCQVGPTR', 'GAEPETGSAVSAAQCQGPTR'	0.127473	-
EIF2S1'	C218	1	1	AGLNCSTENMPIKINLIAPPR'	0.599187	-
EIF2S3'	C105	4	2	SCGSSTPDEFPTDIPGTKGNFK', 'SCGSSTPDEFPTDIPGTK'	-0.792559	Yes
EIF2S3'	C96	4	2	LDDPSCPRPECYR', 'IYKLDDPSCPRPECYR'	0.405514	-
EIF3G'	C25	9	2	PTGDFDSKPSWADQVEEEGEDDKCVTSELLK', 'CVTSELLK'	0.811121	-
EIF4B'	C457	10	2	SLENETLNKEEDCHSPTSKPPKPDQPLK', 'EEDCHSPTSKPPKPDQPLK'	1.32506	-
EIF4G1'	C662	5	2	TPLRPLDPTRLQGINCGPDFTPSFANLGR', 'LQGINCGPDFTPSFANLGR'	-0.0242886	Yes
ENAH'	C62	5	2	KIQDHQVVINCAIPK', 'IQDHQVVINCAIPK'	0.347072	-
ENG'	C549	2	1	TGTLSCTVALRPK'	0.233054	-
ENO1'	C71	4	1	TIAPALVSK'	0.325203	-
ENO1', 'unresolved: gi|319996655|ref|NP_001188412.1|'	C120	9	1	AGAVEKGVPLYR'	-0.286983	-
ENO1', 'unresolved: gi|319996655|ref|NP_001188412.1|'	C403	4	1	LAKYNQLLR'	0.256017	-
ENO1', 'unresolved: gi|319996655|ref|NP_001188412.1|'	C337	2	2	AVNEKSCNCLLLK', 'SCNCLLLK'	0.521836	-
EPCAM'	C99	1	1	AKPEGALQNNDGLYDPDCDESGLFK'	0.110729	Yes
EPRS'	C1480	5	1	SLCIPFKPLCELQPGAK'	-0.657534	-
EPRS'	C336	5	1	KGSQFGQSCCLR'	-0.231223	-
EPRS'	C744	5	2	ERPTPSLNNNCTTSEDSLVLYNR', 'NETSAPFKERPTPSLNNNCTTSEDSLVLYNR'	0.0188667	-
EPRS'	C1148	8	2	LNQWCNVVR', 'DLPIKLNQWCNVVR'	-0.0387819	Yes
ESD'	C28	1	1	VFEHDSVELNCK'	0.130011	-
ETFA'	C155	3	1	TIYAGNALCTVK'	0.0979593	-
EWSR1'	C524	6	1	AGDWQCPNPGCGNQNFAWR'	0.0490271	-
EXOC5'	C111	1	1	VCHLGDQLEGVNTPR'	-0.137861	-
EXOSC1'	C15	2	1	LCNLEEGSPGSGTYTR'	0.0185537	-
EXOSC6'	C98	4	1	LLCDFR'	-0.0124611	-
FADD'	C27	1	1	FLCLGR'	-0.150205	-
FAM120A'	C14	5	1	HCPSAVVPVELQK'	-0.0847327	-
FAM120A'	C1088	5	2	TCNTNPHLNALSTDSACRR', 'TCNTNPHLNALSTDSACR'	0.309064	-
FAM136A'	C57	6	1	CHVPLAQAQALVTSELEK'	-1.05009	-
FAM192A'	C44	9	1	VRKPEDPEECPEEVYDPR'	-0.0826646	-
FAM3C'	C185	2	1	DNWVFCGGK'	-0.166179	-
FAM3C'	C86	3	1	ICLEDNVLMSGVK'	-0.0761889	-
FAM3C'	C64	3	1	ACPEKHFAFK'	0.327935	-
FAM83A'	C356	5	1	SVSASSGPCSPAAPHPPPPPR'	-0.0282127	-
FAM83B'	C801	1	1	LCSSSDTLVSEGEENQKPK'	0.296035	-
FASN'	C2273	4	1	LSIPTYGLQCTR'	-0.0541608	Yes
FASN'	C1992	4	1	DGLLENQTPEFFQDVCKPK'	1.37206	Yes
FDFT1'	C6	4	1	CLGHPEEFYNLVR'	0.0289273	-
FDFT1'	C374	4	1	TQNLPNCQLISR'	-0.00654521	Yes
FKBP10'	C222	4	1	GMDQGLLGMCPGER'	-0.141842	-
FKBP15'	C828	5	1	DEHLQQYQEVCAQR'	-0.0434583	-
FKBP15'	C1031	7	1	DGSLPPELSCIPSHR'	-0.00414416	-
FKBP2'	C97	11	2	GWDQGLLGMCEGEKR', 'GWDQGLLGMCEGEK'	-0.436081	-
FKBP9'	C47	4	1	RFVPDECPR'	-0.0210116	-
FLNA'	C733	6	2	DNGNGTYSCSYVPR', 'DNGNGTYSCSYVPRKPVK'	-0.178211	Yes
FLNA'	C717	1	1	VQVQDNEGCPVEALVK'	-1.36475	-
FLNA'	C1157	5	1	AHVVPCFDASK'	-0.0607395	-
FLNA'	C1453	11	1	CSGPGLSPGMVR'	-0.0492821	-
FLNA'	C2535	12	2	ATCAPQHGAPGPGPADASKVVAK', 'ATCAPQHGAPGPGPADASK'	-0.0781862	Yes
FLNB'	C2501	2	1	SSTETCYSAIPK'	-0.209198	Yes
FLNB'	C604	3	1	IEYNDQNDGSCDVKYWPK'	-0.846421	-
FLNB'	C706	15	2	NRMDGTYACSYTPVK', 'MDGTYACSYTPVK'	-0.133537	-
FLNB'	C1617	3	1	CLATGPGIASTVK'	-0.0416396	-
FLNB'	C2333	6	1	VHSPSGAVEECHVSELEPDKYAVR'	0.0419254	-
FLNB'	C1326	4	1	VAVTEGCQPSRVQAQGPGLK'	0.113381	-
FLNB'	C991	6	1	VVPCLVTPVTGR'	-0.000318114	Yes
FLYWCH2'	C64	8	2	GVHCVMSLGVPGPATLAK', 'KGVHCVMSLGVPGPATLAK'	-0.112743	-
FLYWCH2'	C132	15	3	SRQDPGTDRTEDSGLAAGPPEAAGENFAPCSVAPGK', 'QDPGTDRTEDSGLAAGPPEAAGENFAPCSVAPGK', 'TEDSGLAAGPPEAAGENFAPCSVAPGK'	0.547648	-
FOXK1'	C439	4	1	SGGLQTPECLSR'	0.00942036	-
FSCN1'	C80	5	1	YLAADKDGNVTCER'	0.0141976	Yes
FTSJ1'	C295	4	1	EIRPQDCPISR'	-0.0446995	-
FUBP1'	C332	8	1	CQHAAEIITDLLR'	-0.0297191	-
FUBP1'	C132	5	1	IQQESGCKIQIAPDSGGLPER'	-0.0108089	-
FUS'	C428	15	1	CPNPTCENMNFSWR'	-0.0159423	-
FUS'	C444	1	1	NECNQCKAPKPDGPGGGPGGSHMGGNYGDDR'	0.992005	-
G3BP1'	C73	1	1	VMSQNFTNCHTK'	0.387958	-
GALNT2'	C539	1	1	HVGSNLCLDSR'	-0.00790855	-
GAPDH'	C152	11	2	YDNSLKIISNASCTTNCLAPLAK', 'IISNASCTTNCLAPLAK'	-0.250243	Yes
GAPDH'	C200	11	2	GALQNIIPASTGAAK', 'GALQNIIPASTGAAKAVGK'	-0.290337	-
GAPDH'	C197	17	2	DGRGALQNIIPASTGAAK', 'DGRGALQNIIPASTGAAKAVGK'	-0.28265	-
GAPDH'	C215	6	1	AVGKVIPELNGK'	2.93006	-
GAPDH'	C247	30	2	LTGMAFRVPTANVSVVDLTCR', 'VPTANVSVVDLTCR'	-0.0317372	Yes
GART'	C93	8	1	SAGVQCFGPTAEAAQLESSKR'	0.0131901	Yes
GBF1', 'unresolved: gi|313747582|ref|NP_001186307.1|', 'unresolved: gi|313747584|ref|NP_001186308.1|'	C613	4	1	ETARPSCEIVDGTR'	-0.0135597	-
GCLM'	C72	1	1	EFPDVLECTVSHAVEK'	-0.226503	-
GCN1L1'	C2255	2	1	GEHVPGFCLPK'	0.242324	-
GEMIN5'	C1415	2	1	STANGPDKNEPEVEAEQPLCSSQSQCK'	0.243369	-
GEMIN7'	C44	1	1	RAPLRPEVPEIQECPIAQESLESQEQR'	-0.166535	-
GLG1'	C324	1	1	FCENTQAGEGRVYK'	-0.301077	-
GLG1'	C269	2	1	DAHSQGEVVSCLEK'	0.0831993	-
GLO1'	C139	26	2	GFGHIGIAVPDVYSACKR', 'GFGHIGIAVPDVYSACK'	-0.0289817	Yes
GLUD1'	C376	4	1	AKPYEGSILEADCDILIPAASEK'	-0.229736	Yes
GNG12'	C43	8	1	ASADLMSYCEEHAR'	0.0383589	Yes
GOLGA2'	C64	1	1	IKNGSNPETTTSGGCHSPEDTPK'	1.60265	-
GOT1'	C46	2	1	TDDCHPWVLPVVK'	0.193004	-
GPATCH8'	C402	1	1	EEGAGATEPEYYHYIPPAHCK'	-0.0297411	-
GPI'	C404	21	2	MIPCDFLIPVQTQHPIR', 'MIPCDFLIPVQTQHPIRK'	-0.0229481	Yes
GPS1'	C211	1	1	GHDDLGDHYLDCGDLSNALK'	0.0290243	Yes
GRHPR'	C288	1	1	NCVILPHIGSATHR'	-0.0146993	-
GRPEL1'	C108	2	1	LYGIQAFCK'	-0.531186	-
GSPT2', 'GSPT1'	C582	10	1	FVKQDQVCIAR'	0.0421202	-
GSS'	C409	1	1	IEPEPFENCLLRPGSPAR'	-0.126535	-
GSTO1'	C32	5	1	FCPFAER'	0.111906	-
GTF2B'	C15	4	1	VTCPNHPDAILVEDYR'	0.12756	-
GTF2F2'	C116	8	1	AECRPAASENYMR'	-0.0172581	-
GTF2I'	C215	5	3	VMVTDADRSILSPGGSCGPIKVK', 'SILSPGGSCGPIK', 'SILSPGGSCGPIKVK'	-0.567423	-
HACL1'	C261	2	1	GVVPDNHPYCVGAAR'	-0.0602664	-
HADH'	C211	4	1	ALGKHPVSCKDTPGFIVNR'	-0.299292	-
HCCS'	C35	7	3	GCPVNTEPSGPTCEKK', 'MKGCPVNTEPSGPTCEKK', 'GCPVNTEPSGPTCEK'	0.0400598	-
HCCS'	C176	3	1	WEALHAAECPCGPSLIR'	0.0647868	Yes
HDGF'	C12	7	1	CGDLVFAK'	0.414683	-
HEXIM1'	C79	3	1	AFPQLGGRPGPEGEGSLESQPPPLQTQACPESSCLR'	-0.161245	-
HINT1'	C38	2	1	CLAFHDISPQAPTHFLVIPK'	0.0132706	-
HINT1'	C84	8	1	CAADLGLNKGYR'	0.0647912	-
HMOX2'	C265	3	1	KCPFYAAEQDK'	-2.24477	Yes
HN1L'	C118	12	1	DHVFLCEGEEPK'	0.00421377	-
HNRNPD'	C126	7	1	FGEVVDCTLKLDPITGR'	-0.0831679	-
HNRNPH1'	C34	2	1	FFSDCKIQNGAQGIR'	-0.326931	-
HNRNPH1'	C22	4	2	GLPWSCSADEVQR', 'VRGLPWSCSADEVQR'	0.880869	Yes
HNRNPM'	C694	5	1	GCGVVKFESPEVAER'	0.529884	-
HNRNPM'	C676	2	1	DKFNECGHVLYADIK'	1.38914	-
HNRNPUL1'	C432	3	2	AIVICPTDEDLKDR', 'KAIVICPTDEDLKDR'	-0.0563389	-
HNRPDL', 'unresolved: gi|332801090|ref|NP_001193929.1|'	C177	3	1	FGEVVDCTIKTDPVTGR'	-0.24926	-
HPDL'	C82	4	1	HAVPSATNLCFDVADAGAATR'	-0.128635	-
HPDL'	C9	1	1	LCHIAFHVPAGQPLAR'	-0.0368506	-
HPRT1'	C206	7	2	DLNHVCVISETGKAK', 'DLNHVCVISETGK'	0.104059	-
HSD17B10'	C58	6	3	KLGNNCVFAPADVTSEKDVQTALALAK', 'LGNNCVFAPADVTSEKDVQTALALAK', 'KLGNNCVFAPADVTSEK'	-0.0173995	-
HSD17B4', 'unresolved: gi|313151210|ref|NP_001186221.1|', 'unresolved: gi|313482810|ref|NP_001186220.1|'	C189	2	1	SNIHCNTIAPNAGSR'	0.0943221	-
HSDL2'	C11	3	1	LAGCTVFITGASR'	0.0886904	-
HSPA1B', 'HSPA1A'	C603	11	2	RKELEQVCNPIISGLYQGAGGPGPGGFGAQGPK', 'ELEQVCNPIISGLYQGAGGPGPGGFGAQGPK'	-0.136746	-
HSPA1B', 'HSPA1A'	C574	2	1	VLDKCQEVISWLDANTLAEK'	-0.103391	-
HSPA4'	C417	6	1	WNSPAEEGSSDCEVFSK'	-0.844995	Yes
HSPA4'	C779	31	2	IKELTSTCSPIISKPKPK', 'ELTSTCSPIISKPKPK'	-0.920627	-
HSPA4'	C34	9	2	AGGIETIANEYSDRCTPACISFGPK', 'CTPACISFGPK'	-0.13152	-
HSPA4'	C19	2	1	AGGIETIANEYSDR'	2.20461	-
HSPA4L'	C589	7	2	VKSIDLPIQSSLCR', 'SIDLPIQSSLCR'	0.0344329	-
HSPA4L'	C782	8	2	ELDNFCNPIIYKPKPK', 'SKELDNFCNPIIYKPKPK'	0.372886	-
HSPA8'	C574	30	5	ILDKCNEIINWLDK', 'ILDKCNEIINWLDKNQTAEK', 'CNEIINWLDKNQTAEK', 'CNEIINWLDK', 'CNEIINWLDKNQTAEKEEFEHQQK'	-0.508352	-
HSPA8'	C155	4	1	QATKDAGTIAGLNVLR'	-0.457813	-
HSPA8'	C603	18	2	ELEKVCNPIITK', 'VCNPIITK'	-0.0794484	-
HSPA9'	C608	23	2	MEEFKDQLPADECNK', 'MEEFKDQLPADECNKLK'	-0.260107	-
HSPA9'	C348	8	2	AQFEGIVTDLIRR', 'AQFEGIVTDLIR'	-0.0207435	-
HSPA9'	C366	1	1	RTIAPCQK'	-0.0185003	-
HSPD1'	C447	19	2	CIPALDSLTPANEDQKIGIEIIKR', 'CIPALDSLTPANEDQK'	-0.218442	Yes
HSPD1'	C418	5	1	DRVTDALNATR'	-0.00953179	-
HSPH1'	C34	4	2	CTPSVISFGSK', 'AGGIETIANEFSDRCTPSVISFGSK'	-0.449835	-
HSPH1'	C845	17	2	EEDLEDKNNFGAEPPHQNGECYPNEK', 'NNFGAEPPHQNGECYPNEK'	0.0624435	-
HSPH1'	C796	18	2	IKELNNTCEPVVTQPKPK', 'ELNNTCEPVVTQPKPK'	0.80488	-
ICAM1'	C48	2	1	GGSVLVTCSTSCDQPK'	-0.122205	-
ICAM1'	C457	5	1	DLEGTYLCR'	-0.112057	-
IGF2BP3'	C194	6	1	QKPCDLPLR'	-0.124362	-
IGSF8', 'unresolved: gi|331284207|ref|NP_001193594.1|'	C127	3	1	LQAQDAGIYECHTPSTDTR'	0.0631888	-
ILKAP'	C301	4	2	CGVTSVPDIR', 'CGVTSVPDIRR'	-0.0454975	-
INPPL1'	C926	2	1	SGSRKPAFTEASCPLSR'	-0.0454524	-
INTS6'	C783	3	1	DKEQCAEENIPASSLNK'	-0.504607	-
IP6K1', 'unresolved: gi|338827648|ref|NP_001229758.1|'	C48	2	1	YDDHTVCKPLISR'	-0.591549	-
IPO5'	C990	14	3	TKENVNATENCISAVGK', 'VIQSADSKTKENVNATENCISAVGK', 'ENVNATENCISAVGK'	-0.251545	Yes
IRF2BP2'	C549	3	1	QSIKQQGASGEVYCPSGEK'	0.47093	-
ISCU'	C44	1	1	NVGTGLVGAPACGDVMK'	-0.0644048	-
ITGAV'	C97	1	1	CQPIEFDATGNRDYAK'	0.268003	-
ITGB1'	C568	1	1	SNGLICGGNGVCK'	-0.753811	-
ITGB1'	C691	3	1	DKLPQPVQPDPVSHCK'	-0.363394	-
ITGB4'	C828	1	1	LCTENLLKPDTR'	0.241496	Yes
IWS1'	C749	6	1	ALRPGDPGFCAR'	-0.00279876	-
KARS'	C496	13	2	EICNAYTELNDPMRQR', 'EICNAYTELNDPMR'	0.180676	-
KARS'	C427	8	2	ILDDICVAK', 'KILDDICVAK'	1.11185	Yes
KDELC2'	C156	2	1	TLSCPTKEPQIAK'	-0.159389	-
KDELC2'	C495	6	1	DGMELVPQPEDSTAICQCHR'	-0.00171243	-
KDSR'	C245	10	1	LISETTSVCKPEQVAK'	-0.0890547	-
KHSRP'	C176	11	2	GGEQINKIQQDSGCKVQISPDSGGLPER', 'IQQDSGCKVQISPDSGGLPER'	-0.0615734	-
KIAA0100'	C163	3	2	FLLDSDGKR', 'FLLDSDGK'	-1.48044	-
KIAA0101'	C54	3	1	YAGGNPVCVRPTPK'	-0.0142929	-
KIAA0664'	C1196	1	1	CLTQQAVALQR'	-0.245272	-
KIAA1522', 'unresolved: gi|312176416|ref|NP_001185901.1|'	C634	1	1	VTSLRSPGASVSSSLTSLCSSSSDPAPSDR'	-0.0556488	-
KIAA1598'	C565	4	1	VTFQPPSSIGCR'	0.00292761	-
KIAA1715'	C149	5	1	ECEPPSAGAAVTARPGQEIR'	0.0441638	-
KLC2'	C474	2	1	LEAAHTLEDCASR'	-0.0361911	-
KLF16'	C189	1	1	FSCPLCSKR'	-0.159944	-
L1CAM'	C354	5	1	LDCQVQGRPQPEVTWR'	-0.179999	-
L1CAM'	C312	2	1	VGEEDDGEYRCLAENSLGSAR'	-0.0187197	-
L1CAM'	C158	1	1	ETVKPVEVEEGESVVLPCNPPPSAEPLR'	0.0570695	-
LACTB2'	C100	4	1	SINNDTTYCIK'	-0.345177	-
LARP4'	C552	1	1	KLSYAEVCQKPPKEPSSVLVQPLR'	-0.683623	-
LARP4B'	C633	1	1	ETHSVDRLPSALTATACK'	-0.043317	-
LDHA'	C131	1	1	FIIPNVVKYSPNCK'	-0.549965	Yes
LDHA', 'LDHAL6A'	C163	7	1	NRVIGSGCNLDSAR'	-0.00100913	-
LDHA', 'LDHAL6A', 'LDHB', 'LDHC'	C163	3	2	VIGSGCNLDSAR', 'VIGSGCNLDSARFR'	0.0348682	-
LDLR'	C696	2	1	FTCACPDGMLLAR'	0.0627852	-
LEMD3'	C346	5	2	NLEEAAAAEQGGGCDQVDSSPVPR', 'SRNLEEAAAAEQGGGCDQVDSSPVPR'	0.0721417	-
LEPRE1'	C483	1	1	VVMDGVISDHECQELQR'	0.0516441	-
LETM1'	C552	8	2	EEIDILSDACSKLQEQK', 'EEIDILSDACSK'	-0.692475	-
LGALS1'	C61	19	2	FNAHGDANTIVCNSK', 'FNAHGDANTIVCNSKDGGAWGTEQR'	-0.0373563	Yes
LGALS1'	C43	8	1	DSNNLCLHFNPR'	0.0594646	Yes
LIG1'	C895	2	1	EDKQPEQATTSAQVACLYR'	0.0160379	-
LIMCH1'	C577	6	1	ECPTVAPAHSLTK'	-0.204298	-
LIN7C'	C47	3	1	VLQSEFCNAVR'	-0.0228601	-
LMNA'	C522	5	1	AQNTWGCGNSLR'	-0.0713274	-
LMNA'	C588	1	1	SRTVLCGTCGQPADK'	-0.00985767	-
LOC100507680', 'LOC100510436'	C125	20	1	MYGCDVGPDGR'	-0.0091114	-
LOC100507703', 'LOC100507680', 'LOC100510327'	C363	15	2	KGGSYSQAASSDSAQGSDVSLTACKV', 'KGGSYSQAASSDSAQGSDVSLTACK'	0.476857	-
LPP'	C262	5	1	SAQPSPHYMAAPSSGQIYGSGPQGYNTQPVPVSGQCPPPSTR'	-0.0589073	-
LRP2BP'	C56	1	1	GDTLAYFLR'	-2.00048	-
LRPPRC'	C927	3	1	LQWFCDR'	0.00358071	-
LRRC59'	C48	1	1	ATILDLSCNK'	0.679767	Yes
LRRFIP1'	C702	7	2	SEDADRCTLPEHESPSQDISDACEAESTER', 'CTLPEHESPSQDISDACEAESTER'	0.0254099	-
LSM14A'	C361	3	1	QEKPVNGEDKGDSGVDTQNSEGNADEEDPLGPNCYYDK'	-0.605726	-
LSM14A'	C375	9	3	SFFDNISCDDNR', 'TKSFFDNISCDDNR', 'SFFDNISCDDNRER'	-0.116212	-
LTBP1'	C169	1	1	QQLQGVNVCGGR'	0.0200316	-
LUC7L2'	C348	3	2	FRDQDLASCDR', 'FRDQDLASCDRDR'	-0.0176906	-
LUZP1'	C560	2	1	GHVLGNGSQVTQAANSGCSK'	0.0347171	-
MACROD1'	C199	4	1	AAGPLLTDECR'	0.0776005	-
MAP4'	C1098	4	1	TEGGGSEAPLCPGPPAGEEPAISEAAPEAGAPTSASGLNGHPTLSGGGDQR'	0.00434299	-
MAP4'	C635	3	1	KCSLPAEEDSVLEK'	0.0405123	-
MAP4'	C1008	1	1	CGSKDNIKHVPGGGNVQIQNK'	0.119682	-
MAP7'	C253	6	1	SKSTAALSGEAASCSPIIMPYK'	-0.329857	-
MAP7'	C644	5	1	GALTGGTEVSALPCTTNAPGNGKPVGSPHVVTSHQSK'	1.48258	-
MAP7D1'	C361	3	1	GPQPDRTHPSAAVPVCPR'	-0.0260055	-
MAP7D1'	C373	2	1	SASASPLTPCSVTR'	0.0384621	-
MARS'	C441	2	1	SCPVVQSSQHLFLDLPK'	0.00311913	Yes
MAT2B'	C17	2	1	ELSIHFVPGSCR'	0.00689567	-
MCAM'	C161	7	2	VYKAPEEPNIQVNPLGIPVNSKEPEEVATCVGR', 'APEEPNIQVNPLGIPVNSKEPEEVATCVGR'	-2.67626	-
MCAM'	C272	12	1	CLADGNPPPHFSISK'	-0.0617924	-
MCMBP'	C108	5	1	YRDVAECGPQQELDLNSPR'	0.0206177	-
MDH1', 'unresolved: gi|312283701|ref|NP_001186040.1|', 'unresolved: gi|312283703|ref|NP_001186041.1|'	C137	8	1	VIVVGNPANTNCLTASK'	-0.191369	-
MDH1', 'unresolved: gi|312283701|ref|NP_001186040.1|', 'unresolved: gi|312283703|ref|NP_001186041.1|'	C154	11	2	SAPSIPKENFSCLTR', 'ENFSCLTR'	-0.0631539	-
MDH2'	C89	12	2	AAVKGYLGPEQLPDCLK', 'GYLGPEQLPDCLK'	-0.873738	Yes
MDH2'	C285	11	2	SQETECTYFSTPLLLGKK', 'SQETECTYFSTPLLLGK'	-0.384849	Yes
MDH2'	C93	1	1	GCDVVVIPAGVPR'	-0.115917	Yes
MDH2'	C275	1	1	EGVVECSFVK'	0.877229	-
MDH2'	C212	11	1	TIIPLISQCTPK'	0.0548326	Yes
MED15'	C620	4	1	TFVPAMTAIHGPPITAPVVCTR'	0.0323213	-
MED19'	C163	1	1	LHTGPLPEQCR'	0.0269795	-
MED29'	C202	4	1	DIHTALLDCANKVTGK'	0.166052	-
MEPCE'	C54	4	1	CAPSAGSPAAAVGR'	0.025586	-
MEPCE'	C324	1	1	DAPQPYELNTAINCR'	0.179487	-
METAP2'	C121	5	1	VQTDPPSVPICDLYPNGVFPK'	-0.071739	-
METTL11A'	C64	1	1	EGPNKTGTSCALDCGAGIGR'	-0.597984	Yes
MFF'	C209	3	1	VCPPHMLPEDGANLSSAR'	0.0986242	-
MGMT'	C176	3	1	GNPVPILIPCHR'	0.0180165	-
MGMT'	C55	4	1	LELSGCEQGLHEIK'	0.0446162	-
MGST1'	C50	2	2	VFANPEDCVAFGKGENAK', 'VFANPEDCVAFGKGENAKK'	-0.283167	Yes
MIF'	C81	14	3	LLCGLLAERLR', 'SYSKLLCGLLAER', 'LLCGLLAER'	0.0471226	Yes
MKI67'	C2342	2	1	IACKSPQPDPVDTPASTK'	-0.267407	-
MLL2'	C4424	2	1	EEPCALGAQSVKR'	0.354858	-
MNAT1'	C293	5	1	AASPQDLAGGYTSSLACHR'	0.184454	-
MND1'	C147	3	1	YKDCDPQVVEEIR'	0.0219503	-
MOCOS'	C558	3	1	VWNNSSTVNAVPVAPPVCDVAR'	-0.0571072	-
MPG'	C51	4	1	AGQPHSSSDAAQAPAEQPHSSSDAAQAPCPR'	0.0247565	-
MPST'	C65	3	1	HIPGAAFFDIDQCSDR'	-0.061941	-
MPZL1'	C203	5	2	DYTGCSTSESLSPVK', 'DYTGCSTSESLSPVKQAPR'	0.429884	Yes
MRPL11'	C50	1	1	GVSINQFCK'	0.27132	-
MRPL14'	C90	4	1	ALIVGHCMPGPR'	-0.0117996	-
MRPL17'	C129	4	1	GNCLPPLPLPR'	0.016917	-
MRPL2'	C213	2	1	AAGTCGVLLR'	-0.0842686	-
MRPL50'	C52	6	1	KEPILVCPPLR'	-0.0984764	-
MRPL53'	C63	1	1	HDGSEPCVDVLFGDGHR'	0.0927688	-
MRPL53'	C21	1	1	VQFCPFEK'	1.36067	Yes
MRPS11'	C112	1	1	ASHNNTQIQVVSASNEPLAFASCGTEGFR'	0.290894	-
MRPS16'	C26	1	1	LALGGCTNRPFYR'	-0.24589	-
MRPS17'	C100	1	1	VIDPVTGKPCAGTTYLESPLSSETTQLSK'	-0.0164788	-
MST4'	C254	1	1	EFIDACLNKDPSFRPTAK'	0.41686	-
MT2A'	C44	2	1	CAQGCICKGASDKCSCCA'	-0.49994	-
MTCH2'	C79	4	1	LCSGVLGTVVHGK'	0.138184	-
MUS81'	C74	1	1	ILQHFGDGLCR'	0.0899798	-
MYL6'	C32	7	1	TGDGKILYSQCGDVMR'	0.0365215	-
MYL6', 'unresolved: gi|313851001|ref|NP_001186558.1|', 'MYL6B'	C32	9	1	ILYSQCGDVMR'	-0.0123499	-
MYPN'	C118	2	1	HSPNLSFEPNFCQDNPR'	-0.00972824	-
MYPN'	C1181	1	1	LQNCGVPEGHPVR'	-0.00758858	-
NACC1'	C178	3	1	VKTEQQESDSVQCMPVAK'	-0.163278	-
NAPRT1'	C463	13	1	VWPPGAQEPCTVRPAQVEPLLR'	0.0114228	-
NASP'	C708	13	1	KPTDGASSSNCVTDISHLVR'	-0.00858662	-
NCDN'	C98	1	1	EAPDGCPDHVLR'	-0.221281	-
NCOR1'	C2403	5	1	MLSSTPPTPIACAPSAVNQAAPHQQNR'	0.0334548	-
NDUFA5'	C17	5	1	TTGLVGLAVCNTPHER'	0.134799	-
NDUFB10'	C119	3	1	EGQNYQQNCIKEVEQFTQVAK'	-0.260379	-
NDUFB11'	C151	1	1	YREANGLPIMESNCFDPSKIQLPEDE'	-0.0633563	Yes
NDUFS6'	C87	7	1	VIACDGGGGALGHPK'	0.0464928	-
NDUFS6'	C112	1	1	TGTCGYCGLQFR'	0.214086	-
NFKB2'	C738	2	1	SSFRGHTPLDLTCSTK'	-0.656352	-
NHP2'	C18	6	1	TKIKADPDGPEAQAEACSGER'	-0.030143	-
NHP2L1'	C30	2	2	LLDLVQQSCNYKQLR', 'LLDLVQQSCNYK'	0.119291	-
NIPBL'	C279	3	1	NAASFPLRSPQPVCSPAGSEGTPK'	-0.0960992	-
NIPBL'	C304	4	1	GSRPPLILQSQSLPCSSPR'	0.0555848	-
NIT2'	C44	2	1	IVSLPECFNSPYGAK'	0.0420311	Yes
NME2', 'NME1', 'NME1-NME2'	C109	19	1	GDFCIQVGR'	0.186256	-
NOL3'	C109	4	1	SYDPPCPGHWTPEAPGSGTTCPGLPR'	0.0173804	-
NOP58'	C439	5	2	TYDPSGDSTLPTCSKK', 'TYDPSGDSTLPTCSK'	-0.620295	-
NOSIP'	C8	2	1	NCTAGAVYTYHEK'	-0.0862065	-
NOTCH2'	C1252	2	1	CLPGFAGER'	0.0722037	-
NRAS'	C118	4	2	DSDDVPMVLVGNKCDLPTR', 'VKDSDDVPMVLVGNKCDLPTR'	0.958894	-
NRD1'	C60	2	1	AKSTCSCPDLQPNGQDLGENSR'	0.0256953	-
NSUN2'	C758	18	1	AGEPNSPDAEEANSPDVTAGCDPAGVHPPR'	-0.0168739	Yes
NUBP1'	C277	8	1	NCDKGQSFFIDAPDSPATLAYR'	-0.119178	-
NUBP1'	C307	6	1	IQEFCNLHQSK'	-0.026262	-
NUFIP2'	C234	3	1	GCENLNIVQDK'	-0.358819	-
NUP62'	C475	3	1	DIIEHLNTSGAPADTSDPLQQICK'	0.129924	-
NUPL1'	C252	7	1	ALKDENLPPVICQDVENLQK'	-2.41095	Yes
OGFR'	C443	5	1	TGTQEVGGQDPGEAVQPCRQPLGAR'	-0.00143524	-
OTUB1'	C91	4	1	TRPDGNCFYR'	-0.0733937	-
OXCT1'	C504	3	1	STGCDFAVSPK'	0.344352	-
PAFAH1B3'	C205	2	1	LGYTPVCR'	-0.0347383	-
PAICS'	C281	7	1	VVVLMGSTSDLGHCEK'	-0.0505244	Yes
PARK7'	C53	23	2	DVVICPDASLEDAKK', 'DVVICPDASLEDAK'	-0.0207083	Yes
PARK7'	C46	31	2	AGIKVTVAGLAGKDPVQCSR', 'VTVAGLAGKDPVQCSR'	-0.243616	-
PAWR'	C173	7	1	STGVVNIPAAECLDEYEDDEAGQKER'	-0.160372	-
PBK'	C70	2	1	INPICNDHYR'	-0.0505932	-
PBXIP1'	C588	1	1	YRAPQGCSGVDECAR'	-0.0283324	-
PCBP1'	C109	7	2	LVVPATQCGSLIGK', 'LVVPATQCGSLIGKGGCK'	-0.480158	Yes
PCBP1'	C194	24	1	VMTIPYQPMPASSPVICAGGQDR'	-0.00669337	-
PCBP1'	C158	4	1	AITIAGVPQSVTECVK'	0.0303072	-
PCBP1'	C201	9	1	CSDAAGYPHATHDLEGPPLDAYSIQGQHTISPLDLAK'	1.56971	-
PCBP1', 'PCBP2', 'PCBP3'	C54	2	1	INISEGNCPER'	0.0452768	-
PCBP2'	C109	3	1	LVVPASQCGSLIGKGGCK'	0.90535	-
PCBP2', 'PCBP3'	C109	5	1	LVVPASQCGSLIGK'	0.0514573	-
PCNA'	C162	6	1	DLSHIGDAVVISCAK'	-0.0574172	Yes
PCNA'	C148	3	1	ICRDLSHIGDAVVISCAK'	-0.170792	-
PCYT1A'	C346	3	1	TSPPCSPANLSR'	-0.00540232	Yes
PDCD2L'	C49	1	1	LGGIPDALPTVAAPRPVCQR'	-0.113507	-
PDCD6IP'	C40	7	1	FIQQTYPSGGEEQAQYCR'	0.0464646	Yes
PDHX'	C307	4	1	STVPHAYATADCDLGAVLK'	-0.20438	-
PDIA3'	C85	9	1	VDCTANTNTCNKYGVSGYPTLK'	-0.0962174	Yes
PDIA3'	C62	7	2	LAPEYEAAATR', 'LAPEYEAAATRLK'	-0.054421	-
PDLIM1'	C73	3	1	IKGCTDNLTLTVAR'	0.02192	-
PDLIM5'	C213	17	4	QPTVTSVCSETSQELAEGQRR', 'TAVNVPRQPTVTSVCSETSQELAEGQR', 'TAVNVPRQPTVTSVCSETSQELAEGQRR', 'QPTVTSVCSETSQELAEGQR'	-0.0282913	Yes
PDLIM5'	C73	3	1	GCTGSLNMTLQR'	-0.012185	-
PEBP1'	C168	19	2	YELRAPVAGTCYQAEWDDYVPK', 'APVAGTCYQAEWDDYVPK'	-0.0740112	Yes
PECI'	C338	9	2	EKLHAVNAEECNVLQGR', 'LHAVNAEECNVLQGR'	0.051929	-
PECI'	C47	2	1	QATEGPCNMPKPGVFDLINK'	0.109116	Yes
PFAS'	C512	6	1	GNPICSLHDQGAGGNGNVLK'	-0.53409	-
PFAS'	C1044	7	1	MGPSYCLPPTFPK'	-0.241189	-
PFDN5'	C49	2	1	DCLNVLNKSNEGK'	1.92488	-
PFKM'	C709	4	1	IFANTPDSGCVLGMR'	-0.0110455	-
PFN1'	C128	24	1	CYEMASHLR'	0.0796692	-
PGAM1', 'LOC100290936'	C153	36	4	YADLTEDQLPSCESLKDTIAR', 'RYADLTEDQLPSCESLKDTIAR', 'YADLTEDQLPSCESLK', 'RYADLTEDQLPSCESLK'	-0.0838373	-
PGD'	C170	2	1	VGTGEPCCDWVGDEGAGHFVK'	0.267584	-
PGK1'	C50	2	1	AAVPSIKFCLDNGAK'	-0.250411	Yes
PGK1'	C108	14	1	ACANPAAGSVILLENLR'	-0.025646	Yes
PHAX'	C51	4	1	AFQNTATACAPVSHYR'	-0.00638095	-
PHGDH'	C369	3	1	NAGNCLSPAVIVGLLK'	-0.128804	Yes
PHGDH'	C236	4	1	GGIVDEGALLR'	-0.139924	-
PHGDH'	C18	9	2	VLISDSLDPCCRK', 'VLISDSLDPCCR'	0.0211308	-
PHGDH'	C254	20	1	ALQSGQCAGAALDVFTEEPPRDR'	0.254681	Yes
PHGDH'	C281	9	2	ALVDHENVISCPHLGASTK', 'ALVDHENVISCPHLGASTKEAQSR'	0.507987	Yes
PIN1'	C113	6	2	IKSGEEDFESLASQFSDCSSAK', 'SGEEDFESLASQFSDCSSAK'	-0.230463	-
PITPNB'	C13	1	1	VVLPCSVQEYQVGQLYSVAEASK'	0.00235801	Yes
PKM2', 'LOC652797', 'unresolved: gi|332164775|ref|NP_001193725.1|', 'unresolved: gi|332164777|ref|NP_001193726.1|', 'unresolved: gi|332164781|ref|NP_001193728.1|'	C49	9	1	NTGIICTIGPASR'	0.0110694	-
PLCB3'	C1176	3	1	LLAQLAQECQEQR'	0.0474278	-
PLEC'	C3177	5	1	CRPDQLTGLSLLPLSEK'	-0.103413	-
PLEKHA5'	C891	3	1	SAVEQLCLAESTRPR'	-0.261968	-
PLIN2'	C302	2	1	SIGYDDTDESHCAEHIESR'	-0.0122875	Yes
PLIN3'	C39	15	1	VASMPLISSTCDMVSAAYASTK'	-0.238807	-
PLIN3'	C341	8	2	DIAQQLQATCTSLGSSIQGLPTNVK', 'DIAQQLQATCTSLGSSIQGLPTNVKDQVQQAR'	0.216306	Yes
PLS3'	C104	10	1	EGICALGGTSELSSEGTQHSYSEEEK'	-0.148749	Yes
PLS3'	C463	5	2	LENCNYAVELGKHPAK', 'KLENCNYAVELGKHPAK'	0.164178	-
PODXL'	C349	1	1	LISLICR'	-0.0895889	-
PODXL2'	C548	1	1	FVENGCHDNPTLDVASDSQSEMQEK'	-0.559305	-
POP1'	C804	3	1	ITDQEASENHVAATGSHLCVLR'	-0.0558186	-
PPA1'	C242	54	4	TNGKGISCMNTTLSESPFKCDPDAAR', 'GISCMNTTLSESPFKCDPDAAR', 'TNGKGISCMNTTLSESPFK', 'GISCMNTTLSESPFK'	-0.627051	-
PPA1'	C113	4	1	HTGCCGDNDPIDVCEIGSK'	-0.142521	-
PPA1'	C270	9	2	AIVDALPPPCESACTVPTDVDKWFHHQKN', 'AIVDALPPPCESACTVPTDVDKWFHHQK'	0.0695924	-
PPIA'	C161	19	2	TSKKITIADCGQLE', 'KITIADCGQLE'	-0.0314602	Yes
PPIA'	C115	12	1	HTGPGILSMANAGPNTNGSQFFICTAK'	-0.0226371	Yes
PPIA'	C62	21	1	IIPGFMCQGGDFTRHNGTGGK'	0.244712	-
PPIA', 'LOC100293160'	C52	11	1	ALSTGEKGFGYKGSCFHR'	0.613914	-
PPIA', 'LOC390956', 'LOC100293160'	C52	14	1	GFGYKGSCFHR'	0.35564	-
PPIA', 'LOC390956', 'PPIAL4C', 'PPIAL4B', 'PPIAL4A'	C62	46	1	IIPGFMCQGGDFTR'	-0.031906	-
PPIB'	C202	14	1	DKPLKDVIIADCGK'	-1.55611	-
PPIF'	C104	24	1	VIPSFMCQAGDFTNHNGTGGK'	-0.00829716	Yes
PPIG'	C310	6	2	ECNPPNSQPASYQR', 'ERECNPPNSQPASYQR'	-0.0294931	-
PPIL1'	C36	1	1	TCKNFAELAR'	-0.645331	-
PPIL1'	C133	2	1	VCQGIGMVNR'	-0.0243577	-
PPM1G'	C241	14	2	AYTGFSSNSERGTEAGQVGEPGIPTGEAGPSCSSASDKLPR', 'GTEAGQVGEPGIPTGEAGPSCSSASDKLPR'	-0.00967829	Yes
PPM1G'	C164	2	1	YGQNCHKGPPHSK'	0.952778	-
PPP1R2'	C86	2	1	IDEPSTPYHSMMGDDEDACSDTEATEAMAPDILAR'	-0.0098851	-
PPP2R1A'	C174	19	2	NLCSDDTPMVRR', 'NLCSDDTPMVR'	-0.129081	Yes
PPP4R2'	C377	4	1	DLLHSEGSENEGPVSSSSSDCR'	0.0406416	-
PPP6R3'	C764	10	1	CAAPRPPSSSPEQR'	0.00479851	-
PRDX1', 'unresolved: gi|320461711|ref|NP_001189360.1|'	C173	28	2	LVQAFQFTDKHGEVCPAGWKPGSDTIKPDVQK', 'HGEVCPAGWKPGSDTIKPDVQK'	-0.507283	-
PRDX1', 'unresolved: gi|320461711|ref|NP_001189360.1|', 'PRDX2'	C140	4	1	QITVNDLPVGR'	-0.10665	-
PRDX2'	C172	1	1	LVQAFQYTDEHGEVCPAGWKPGSDTIKPNVDDSK'	0.246431	Yes
PRDX3'	C229	2	1	AFQYVETHGEVCPANWTPDSPTIKPSPAASK'	0.871849	Yes
PRDX4'	C51	66	2	TREEECHFYAGGQVYPGEASR', 'EEECHFYAGGQVYPGEASR'	-0.0106733	Yes
PRDX5'	C100	11	1	KGVLFGVPGAFTPGCSK'	-0.00604948	-
PRDX6'	C91	8	2	DINAYNCEEPTEKLPFPIIDDR', 'DINAYNCEEPTEKLPFPIIDDRNR'	-0.340424	Yes
PRDX6'	C47	7	1	DFTPVCTTELGR'	0.0242258	Yes
PRKAR1A'	C362	5	1	VLGPCSDILKR'	-0.513634	-
PRKCSH'	C485	16	1	LLCGKETMVTSTTEPSR'	-0.135937	-
PRKCSH'	C471	20	3	FSAMKYEQGTGCWQGPNR', 'YEQGTGCWQGPNRSTTVR', 'YEQGTGCWQGPNR'	-0.00896674	-
PRKCSH'	C70	3	1	DGSDEPGTAACPNGSFHCTNTGYKPLYIPSNR'	0.202936	-
PRKCSH'	C97	6	1	VNDGVCDCCDGTDEYNSGVICENTCKEK'	0.229256	-
PRKCSH'	C428	1	1	LCPFKLVSQKPK'	2.10566	-
PROSC'	C261	2	1	CAADVKAPLEVAQEH'	-0.0689148	-
PRRC2A', 'unresolved: gi|314122241|ref|NP_004629.3|'	C437	6	2	GGPPCKPPAPEDEDEAWR', 'GGPPCKPPAPEDEDEAWRQR'	0.461088	-
PRRC2B'	C1482	1	1	SPDEALPGGLSGCSSGSGHSPYALER'	0.050369	-
PRRC2B'	C246	2	2	NSSTGDGAPSSACTSDSKDPSLRPAQPVRK', 'NSSTGDGAPSSACTSDSKDPSLRPAQPVR'	0.450756	-
PRRC2C'	C177	8	1	ETNDDNYGPGPSLRPPNVACWR'	0.0255104	-
PRRC2C'	C895	4	1	SVEDVRPHHTDANNQSACFEAPDQK'	0.0623524	-
PSAP'	C482	1	1	IGACPSAHKPLLGTEK'	-0.433874	-
PSAP'	C33	2	1	GSAVWCQNVK'	0.285807	-
PSIP1'	C204	2	1	MVKQPCPSESDIITEEDK'	0.321815	-
PSMC1'	C58	2	1	TKGPDAASKLPLVTPHTQCR'	0.468425	-
PSMD1'	C806	10	2	SNCKPSTFAYPAPLEVPKEK', 'SNCKPSTFAYPAPLEVPK'	-0.308159	-
PSMD1'	C898	18	1	VLTMPETCR'	0.0145766	-
PSMD10'	C180	4	1	ASTNIQDTEGNTPLHLACDEER'	0.0333899	-
PSMD4'	C37	6	2	LQAQQDAVNIVCHSK', 'NGDFLPTRLQAQQDAVNIVCHSK'	-0.122486	-
PSMD9'	C59	12	1	GIGMNEPLVDCEGYPR'	0.00367625	-
PSME1'	C22	5	1	VDVFREDLCTK'	-0.141669	-
PSME3'	C92	6	1	RLDECEEAFQGTK'	-0.168757	Yes
PSPH'	C38	13	2	ICGVEDAVSEMTRR', 'ICGVEDAVSEMTR'	0.0462236	-
PTBP1'	C23	11	3	RGSDELFSTCVTNGPFIMSSNSASAANGNDSKK', 'RGSDELFSTCVTNGPFIMSSNSASAANGNDSK', 'GSDELFSTCVTNGPFIMSSNSASAANGNDSKK'	0.239691	-
PURB'	C17	4	1	GGGGGPCGFQPASR'	-0.0144618	-
PXN'	C108	4	1	TSSVSNPQDSVGSPCSR'	0.0174768	Yes
PYCR1'	C120	2	1	CMTNTPVVVR'	0.0778347	-
QDPR'	C161	7	1	GAVHQLCQSLAGK'	0.0941353	-
R3HDM2'	C386	2	1	ISRPGMALGAPEVCNQVTSSQSVR'	0.0532937	-
RAB11FIP1'	C318	1	1	SNVCINGNHVYLEQPEAK'	-0.0167717	-
RAB34'	C19	2	1	DRVLAELPQCLRK'	0.00693019	-
RABEPK'	C36	5	2	VGHSCSYLPPVGNAK', 'VGHSCSYLPPVGNAKR'	-0.127065	-
RAC1'	C124	2	1	HHCPNTPIILVGTK'	-0.175525	-
RAD51AP1'	C237	2	1	SKCNALVTSVDSAPAAVK'	0.171078	-
RANBP1'	C99	29	1	ICANHYITPMMELKPNAGSDR'	0.0969	-
RANBP3'	C116	2	1	SAGGSSPEGGEDSDREDGNYCPPVKR'	0.041652	-
RAP1B', 'RAP1BL'	C141	2	1	QWNNCAFLESSAK'	-0.0535444	-
RAP1B', 'RAP1BL'	C118	2	1	VKDTDDVPMILVGNKCDLEDER'	0.168013	-
RAP1GDS1'	C118	3	1	ALGNICYDSHEGR'	-0.0681865	-
RBBP4'	C167	4	2	HPSKPDPSGECNPDLR', 'TPSSDVLVFDYTKHPSKPDPSGECNPDLR'	-0.830301	-
RBBP4'	C138	2	1	YMPQNPCIIATK'	-0.504568	-
RBBP6'	C174	3	1	NCPTNGDKNFESGPR'	-0.0583515	-
RBBP7'	C166	9	2	HPAKPDPSGECNPDLR', 'TPSSDVLVFDYTKHPAKPDPSGECNPDLR'	1.70074	-
RBM24', 'RBM38'	C24	2	1	ACKDPNPIIDGR'	0.323266	-
RBM33'	C726	4	1	CSATPSAQVKPIVSASPPSR'	-0.146393	-
RBM4', 'unresolved: gi|311771540|ref|NP_001185772.1|', 'unresolved: gi|311771542|ref|NP_001185773.1|'	C89	2	1	LHVGNISPTCTNK'	-0.00502223	-
RCC2'	C337	10	1	DVACGANHTLVLDSQKR'	-0.0263914	Yes
RCC2'	C305	7	2	AQRIEYDCELVPR', 'IEYDCELVPR'	-0.24053	-
RCC2'	C158	1	1	TVVSGSCAAHSLLITTEGK'	-0.0777041	-
RHOA'	C159	2	1	IGAFGYMECSAK'	-0.183775	Yes
RHOA', 'RHOC'	C107	1	1	HFCPNVPIILVGNKK'	-0.824977	-
RHOB'	C159	1	1	IQAYDYLECSAK'	0.211688	-
RIMS1'	C1689	2	2	ASQSSLESSTGPPCIR', 'RASQSSLESSTGPPCIR'	0.0830937	-
RNASEH2A'	C24	2	2	LSSPVPAVCRK', 'LSSPVPAVCR'	-0.646316	-
RNASEH2C'	C34	3	1	DAVPATLHLLPCEVAVDGPAPVGR'	0.0366703	-
RNF126'	C229	1	1	IQALPTVPVTEEHVGSGLECPVCKDDYALGER'	0.999541	-
RNF149'	C90	2	1	EGAHGLVGVPWAPGGDLEGCAPDTR'	-0.020252	-
RNGTT'	C13	1	1	WLNCPR'	0.183681	-
RPA2'	C219	5	2	ACPRPEGLNFQDLK', 'ACPRPEGLNFQDLKNQLK'	-0.128637	-
RPAP1'	C195	1	1	NQGCQLPGSSHSFQGPNLVTGK'	0.283722	-
RPL10A'	C66	9	1	FSVCVLGDQQHCDEAK'	0.0208376	Yes
RPL12'	C141	2	2	EILGTAQSVGCNVDGRHPHDIIDDINSGAVECPAS', 'EILGTAQSVGCNVDGR'	-1.14979	Yes
RPL12'	C17	13	2	CTGGEVGATSALAPK', 'CTGGEVGATSALAPKIGPLGLSPK'	0.0853313	-
RPL14'	C42	8	2	ALVDGPCTQVRR', 'ALVDGPCTQVR'	0.0206711	Yes
RPL23'	C28	6	1	ISLGLPVGAVINCADNTGAK'	0.0963623	Yes
RPL24'	C6	1	1	MKVELCSFSGYK'	-0.655636	Yes
RPL27A'	C70	4	1	NQSFCPTVNLDK'	-0.415987	Yes
RPL28'	C13	16	2	NCSSFLIKR', 'NCSSFLIK'	0.0984278	-
RPL30'	C85	5	1	TGVHHYSGNNIELGTACGK'	0.133329	-
RPL30'	C52	4	2	LVILANNCPALR', 'LVILANNCPALRK'	0.161462	-
RPL36'	C48	31	4	EVCGFAPYERR', 'DMIREVCGFAPYER', 'EVCGFAPYER', 'DMIREVCGFAPYERR'	0.0266045	-
RPL37'	C19	1	1	NKTHTLCRR'	0.329651	-
RPL4'	C96	60	2	SGQGAFGNMCRGGR', 'SGQGAFGNMCR'	-0.0142682	Yes
RPL6'	C44	2	1	KGKPHCSRNPVLVR'	-0.285978	-
RPL7A'	C182	3	1	MGVPYCIIKGK'	-0.593198	-
RPL7A'	C199	8	1	TCTTVAFTQVNSEDKGALAK'	0.178476	Yes
RPLP1'	C61	22	2	ALANVNIGSLICNVGAGGPAPAAGAAPAGGPAPSTAAAPAEEK', 'ALANVNIGSLICNVGAGGPAPAAGAAPAGGPAPSTAAAPAEEKK'	0.354832	Yes
RPP25'	C70	1	1	AIVFSGCGR'	-0.0361982	-
RPP25'	C80	1	1	TVTCAEILKR'	0.727621	-
RPS11'	C60	7	1	KCPFTGNVSIR'	0.909804	-
RPS11'	C131	7	1	DVQIGDIVTVGECRPLSK'	0.0983159	Yes
RPS12'	C92	1	1	LGEWVGLCK'	1.63812	-
RPS17', 'unresolved: gi|312284072|ref|NP_001185986.1|'	C35	8	2	VCEEIAIIPSK', 'VCEEIAIIPSKK'	-2.07646	-
RPS20'	C36	4	1	SLEKVCADLIR'	-0.337313	-
RPS29'	C39	18	1	YGLNMCR'	0.00365212	-
RPS5'	C172	13	2	TIAECLADELINAAKGSSNSYAIK', 'TIAECLADELINAAK'	-0.0453864	Yes
RPS5'	C66	2	1	FRKAQCPIVER'	0.0226106	Yes
RPS8'	C174	4	1	LLACIASRPGQCGR'	-0.00474202	-
RRBP1'	C500	7	2	SKCEELSGLHGQLQEAR', 'CEELSGLHGQLQEAR'	0.0132174	-
RRM1'	C779	5	1	ERNTAAMVCSLENR'	-0.319494	-
RRP1B'	C628	2	1	VMSNLVEHNGVLESEAGQPQALGSSGTCSSLKK'	0.820643	-
RSL1D1'	C47	2	1	AVDALLTHCK'	-3.01137	-
RUVBL2'	C227	8	2	FVQCPDGELQKR', 'FVQCPDGELQK'	-0.0309564	-
S100A11'	C13	4	1	CIESLIAVFQK'	-0.131556	Yes
SARNP'	C20	5	1	LAELKQECLAR'	-1.32677	-
SCAF1'	C675	2	2	SGDGSEKAPAPAPPPSGSTSCGDR', 'SGDGSEKAPAPAPPPSGSTSCGDRDSR'	0.114389	-
SCRN1'	C324	6	1	TQSPCFGDDDPAKKEPR'	-0.904544	-
SDHB'	C98	1	1	EGICGSCAMNINGGNTLACTRR'	0.0655341	-
SEC16A'	C504	2	1	HGAVCHTGAPDATLHTVHPDSVSSSYSSR'	-0.0388456	-
SEC16A'	C2337	5	1	EVSQHFNQAPGDLPAAGGPPSGAMPFYNPAQLAQACATSGSSR'	-0.0151216	-
SEC16A'	C107	4	1	DSSQGPCEPLPGPLTQPR'	0.00812568	-
SEPHS1'	C31	5	1	GTGCKVPQDVLQK'	-0.292865	-
SEPT9'	C230	6	1	SQEATEAAPSCVGDMADTPR'	-0.00885166	Yes
SERBP1'	C11	8	1	PGHLQEGFGCVVTNR'	0.0139546	-
SF3B5'	C76	9	1	MLQPCGPPADKPEEN'	-0.0280651	-
SGPP1'	C27	3	1	LCGVEAPPRR'	0.0296497	-
SGTA'	C148	4	1	LGNYAGAVQDCER'	-0.0433522	Yes
SGTA'	C129	9	1	AIELNPANAVYFCNR'	-0.0233532	Yes
SHMT2'	C412	6	1	VLELVSITANKNTCPGDR'	-0.0811927	-
SLC25A24'	C311	2	2	TGQYSGIYDCAK', 'TGQYSGIYDCAKK'	-0.824519	Yes
SLC25A5'	C257	4	2	KGTDIMYTGTLDCWRK', 'KGTDIMYTGTLDCWR'	-0.263619	Yes
SLC3A2'	C432	7	1	WCSWSLSQAR'	-0.052802	-
SLC4A1AP'	C730	2	1	TTSLCAGPSASKNEYEK'	0.0816933	-
SLC4A1AP'	C723	1	1	ETQTHENMSQLSEEEQNKDYQDCSK'	1.36153	-
SLC9A3R1'	C242	1	1	CRVIPSQEHLNGPLPVPFTNGEIQK'	0.215901	-
SLC9A3R2'	C271	9	2	VTPTEEHVEGPLPSPVTNGTSPAQLNGGSACSSR', 'LRVTPTEEHVEGPLPSPVTNGTSPAQLNGGSACSSR'	0.036062	-
SMARCC1'	C761	1	1	ASGKVDPTYGLESSCIAGTGPDEPEKLEGAEEEK'	1.02288	-
SMC2'	C585	2	1	CIAPETLR'	-0.0398595	-
SMNDC1'	C214	8	2	VGVGTCGIADKPMTQYQDTSK', 'VGVGTCGIADKPMTQYQDTSKYNVR'	0.0699473	-
SNRPD2'	C46	4	1	NNTQVLINCR'	0.0542616	-
SOD1'	C7	4	1	AVCVLKGDGPVQGIINFEQK'	-0.190189	-
SOD1'	C58	3	1	GLTEGLHGFHVHEFGDNTAGCTSAGPHFNPLSR'	-0.102082	-
SOD1'	C112	1	1	HVGDLGNVTADKDGVADVSIEDSVISLSGDHCIIGR'	1.08729	-
SPAST'	C220	2	1	SQTDVYNDSTNLACR'	-0.0231833	-
SPATS2'	C356	2	1	FTCDVETLKK'	0.270471	-
SPHK1'	C49	1	1	GPAAAGNDAGAPAATAPGGEGEPHSRPCDAR'	-0.00986861	-
SPTAN1'	C1930	7	2	VNDVCTNGQDLIKK', 'VNDVCTNGQDLIK'	-1.87724	-
SPTAN1'	C1314	7	2	CTELNQAWSSLGKR', 'CTELNQAWSSLGK'	-0.29686	-
SQSTM1'	C289	2	1	SSSQPSSCCSDPSKPGGNVEGATQSLAEQMR'	-0.0999769	-
SR140'	C65	2	1	ESLCDSPHQNLSRPLLENK'	-0.141212	-
SREK1'	C494	7	2	TEENKIQHNGNCQLNEENLSTK', 'IQHNGNCQLNEENLSTK'	0.243178	-
SRP14'	C56	7	1	KGTVEGFEPADNKCLLR'	-0.205886	Yes
SRPRB'	C246	4	1	VEFLECSAK'	0.445394	-
SRRM2'	C1016	6	2	VKAQTPPGPSLSGSKSPCPQEK', 'AQTPPGPSLSGSKSPCPQEK'	-0.152605	-
SRRM2'	C2130	5	1	CRSPGMLEPLGSSR'	0.0108959	-
SRRT'	C412	2	1	DAAGLECKPRPLHK'	-1.84264	-
SRSF1'	C148	13	2	EAGDVCYADVYRDGTGVVEFVR', 'EAGDVCYADVYR'	-0.0899314	Yes
SRSF3'	C72	1	1	ELDGRTLCGCR'	0.0446249	-
SSB'	C18	3	1	ICHQIEYYFGDFNLPR'	0.00167985	-
SSSCA1'	C125	1	1	EHQLASASELPLGSRPAPQPPVPRPEHCEGAAAGLK'	1.46475	-
ST13'	C209	7	1	LLGHWEEAAHDLALACK'	-0.291266	-
ST13'	C16	47	1	MCKQDPSVLHTEEMR'	-0.057076	-
STIP1'	C461	13	2	AMDVYQKALDLDSSCKEAADGYQR', 'ALDLDSSCKEAADGYQR'	-0.0244842	Yes
STIP1'	C26	5	1	ALSVGNIDDALQCYSEAIK'	-0.015173	Yes
STIP1'	C370	34	1	NKGNECFQKGDYPQAMK'	0.0838544	-
STIP1'	C282	4	2	ELCEKAIEVGRENR', 'ELCEKAIEVGR'	0.241082	-
STIP1'	C339	2	1	CQQAEKILKEQER'	0.75477	-
STRAP'	C305	6	1	CVLPEEDSGELAKPK'	-0.0766699	Yes
STUB1'	C48	5	1	KYPEAAACYGR'	0.209929	-
STX12'	C29	3	1	DFSSIIQTCSGNIQR'	-0.0111527	-
STX17'	C290	2	1	LTSSCPDLPSQTDKK'	0.0219327	-
STX5'	C68	1	1	DRTQEFLSACK'	-0.704508	-
SUCLG1'	C60	4	1	IICQGFTGK'	-0.263577	-
SUCLG1'	C172	3	1	TRLIGPNCPGVINPGECK'	-0.0578615	-
SUGT1'	C49	1	1	ALEQKPDDAQYYCQR'	-0.00491277	-
SUPT5H'	C740	3	1	VELHSTCQTISVDR'	-0.0283592	-
TACC3'	C459	1	1	LGQPAAEQLHAGPATEEPGPCLSQQLHSASAEDTPVVQLAAETPTAESK'	-0.0234856	-
TACC3'	C242	4	1	HGGVCAPAAVATSPPGAIPK'	0.43766	-
TADA3'	C7	3	1	DCPLQFHDFK'	-0.0511227	-
TAF10'	C174	5	1	FISDIANDALQHCK'	-0.197644	-
TAF1C'	C737	2	1	DTPGCATTPPHSQASSVR'	-0.134973	-
TANC1'	C1611	3	1	LQCGENGPAHPLPSK'	-0.017186	-
TAPBP'	C115	5	1	WASGLTPAQNCPR'	0.0014415	-
TARDBP'	C50	15	1	YRNPVSQCMR'	-0.114263	-
TBC1D15'	C677	3	1	NDSPTQIPVSSDVCR'	0.0211929	-
TBC1D22A'	C151	4	1	SVSESHTSCPAESASDAAPLQR'	0.0415666	-
TBCA'	C67	119	2	MMIPDCQRR', 'MMIPDCQR'	0.00621669	-
TCEA2', 'TCEA1'	C261	3	1	TGGTQTDLFTCGK'	0.275487	-
TCEAL1'	C90	2	1	DLFEGRPPMEQPPCGVGK'	0.101655	-
TCEB2'	C60	6	2	LYKDDQLLDDGKTLGECGFTSQTARPQAPATVGLAFR', 'TLGECGFTSQTARPQAPATVGLAFR'	-0.00647043	-
TCOF1'	C935	3	1	SSSSESEDEDVIPATQCLTPGIR'	0.0122056	-
TES'	C164	2	1	QLPAHDQDPSKCHELSPR'	0.129206	-
TFRC'	C353	32	4	AAAEKLFGNMEGDCPSDWKTDSTCR', 'LFGNMEGDCPSDWKTDSTCR', 'AAAEKLFGNMEGDCPSDWK', 'LFGNMEGDCPSDWK'	-0.143883	Yes
THEM4'	C46	5	1	DCSVPNPSWNKDLR'	0.144639	-
TK1'	C230	4	1	KLFAPQQILQCSPAN'	-0.00784996	Yes
TLN1'	C956	3	1	ASAGPQPLLVQSCK'	-0.212403	-
TLN1'	C1023	3	1	ASVPTIQDQASAMQLSQCAK'	-0.177324	-
TLN1'	C1661	3	1	DKAPGQLECETAIAALNSCLR'	-0.140853	-
TLN1'	C2408	6	1	MVAAATNNLCEAANAAVQGHASQEK'	0.0618902	-
TMPO'	C254	5	1	EMFPYEASTPTGISASCR'	0.0128143	Yes
TMPO'	C518	1	1	QLPSLACKYPVSSR'	0.221001	-
TMPO'	C330	4	2	DIVENICGR', 'ETTTGYYKDIVENICGR'	0.289224	-
TMPO'	C341	5	2	EKSGIQPLCPER', 'SGIQPLCPER'	0.923564	-
TNKS1BP1'	C232	4	1	GWSQEGPVKSPAECR'	-0.135249	-
TNKS1BP1'	C1373	5	1	EHGVGGVSQCPEPGLR'	-0.0571838	-
TOE1'	C371	3	1	DGPPKKQVCGDSIKPEETEQEVAADETR'	-0.668511	-
TOMM34'	C250	5	2	DCTEALKLDGK', 'DCTEALKLDGKNVK'	-1.06822	-
TOMM34'	C74	2	1	DCTSALALVPFSIKPLLR'	0.0180995	-
TOR1AIP1'	C424	6	1	CLSEQIADAYSSFR'	-0.00454278	-
TP53BP1'	C1375	1	1	KGVSQTGTPVCEEDGDAGLGIR'	0.0522531	-
TPI1'	C42	16	1	VPADTEVVCAPPTAYIDFAR'	-0.0649406	Yes
TPI1'	C218	26	1	IIYGGSVTGATCK'	0.210715	Yes
TPI1'	C87	20	2	DCGATWVVLGHSERR', 'DCGATWVVLGHSER'	0.0410127	-
TPM2'	C36	6	1	CKQLEEEQQALQKK'	-0.0567299	-
TPM3'	C226	1	1	TIDDLEDKLKCTK'	-0.48487	Yes
TPM4'	C154	3	1	CGDLEEELKNVTNNLK'	-0.0389765	-
TRAFD1'	C476	2	1	STSGPRPGCQPSSPCVPK'	0.0170914	-
TRIAP1'	C37	5	2	FLKGDSSGDPCTDLFKR', 'FLKGDSSGDPCTDLFK'	-0.180876	-
TRMT1'	C620	5	1	GDQCCYSHSPPTPR'	-0.187931	-
TRMT112'	C33	4	1	ICPVEFNPNFVAR'	0.031554	-
TSN'	C225	1	1	GFNKETAAACVEK'	-2.38352	Yes
TTC38'	C367	2	1	DASESPGENCQHLLAR'	0.0153757	-
TTF2'	C224	1	1	SQQCQGNELTRPSASSQEK'	0.0059595	-
TXLNA'	C523	3	1	VTEAPCYPGAPSTEASGQTGPQEPTSARA'	0.021655	-
TXLNG'	C101	4	1	NLVSPAYCTQESR'	0.000327811	-
TXNDC5'	C121	2	1	VDCTAHSDVCSAQGVR'	0.000597895	Yes
TXNDC5'	C350	12	1	FYAPWCGHCK'	-0.347905	-
UBA1'	C632	4	1	SIPICTLK'	-0.064674	Yes
UBA1'	C234	4	1	DNPGVVTCLDEAR'	0.0369901	Yes
UBA1'	C23	9	1	VSGPDPKPGSNCSPAQSVLSEVPSVPTNGMAK'	0.267505	-
UBA2'	C185	2	1	NTPSEPIHCIVWAK'	-0.140243	-
UBA2'	C173	12	1	TFPGCTIR'	-0.0736258	-
UBA52'	C115	2	1	CGHTNNLRPK'	-1.14617	-
UBAP2L'	C68	5	1	NQDECVIALHDCNGDVNR'	0.0205693	-
UBE2L3'	C86	1	1	GQVCLPVISAENWKPATK'	0.253696	-
UBE2N'	C87	4	1	ICLDILK'	-0.879939	-
UBE2V1', 'TMEM189-UBE2V1'	C27	3	1	IECGPKYPEAPPFVR'	0.0490938	-
UBE2V2'	C69	7	2	IYSLKVECGPKYPEAPPSVR', 'VECGPKYPEAPPSVR'	0.134641	-
UBR5', 'LOC730429'	C51	5	1	QCVVGPNHAAFLLEDGR'	-0.0384685	-
UBXN4'	C186	2	1	SDTATGGESAGHATSSQEPSGCSDQRPAEDLNIR'	-0.00369089	Yes
UCHL3'	C95	1	1	QTISNACGTIGLIHAIANNKDK'	0.753265	-
UCHL5', 'unresolved: gi|312922359|ref|NP_001186190.1|', 'unresolved: gi|312922361|ref|NP_001186191.1|', 'unresolved: gi|312922364|ref|NP_001186192.1|'	C191	3	2	EGPIDLGACNQDDWISAVRPVIEK', 'EGPIDLGACNQDDWISAVRPVIEKR'	0.060143	-
UCK2'	C241	4	1	QTNGCLNGYTPSR'	0.138756	-
UIMC1', 'unresolved: gi|313151224|ref|NP_001186226.1|', 'unresolved: gi|313151226|ref|NP_001186227.1|'	C121	2	1	AIAESLNSCRPSDASATR'	-0.234495	-
UQCRC1'	C410	2	1	NALVSHLDGTTPVCEDIGR'	0.0958469	Yes
UQCRH'	C67	10	1	SHTEEDCTEELFDFLHAR'	0.0396605	-
USO1'	C678	1	1	CQNEQLQTAVTQQVSQIQQHKDQYNLLK'	0.438477	-
USP10'	C254	6	1	TAGQPEGGPGADFGQSCFPAEAGR'	0.0338866	-
VAPA'	C128	5	1	CVFEMPNENDKLNDMEPSK'	-0.212288	-
VAPB'	C41	4	1	LGNPTDRNVCFK'	0.111297	-
VARS'	C41	11	1	ICLQPPPTSR'	-0.0212939	Yes
VASP'	C334	5	2	SSSSVTTSETQPCTPSSSDYSDLQR', 'MKSSSSVTTSETQPCTPSSSDYSDLQR'	-0.214907	Yes
VAT1'	C86	3	1	ACGLNFADLMAR'	-0.233689	-
VCL'	C985	1	1	IRTNLLQVCER'	0.0127354	Yes
VCP'	C691	10	1	MTNGFSGADLTEICQR'	-0.0525781	Yes
VPS28'	C60	2	1	AYIKDCVSPSEYTAACSR'	-0.165087	-
WRNIP1'	C39	3	1	CLLLHPAGHAEPAAGSHR'	-0.0354294	-
XPO5'	C1157	1	1	LIAGCIGKPLGEQFRK'	0.356693	-
XPOT'	C650	4	1	QASLADCLNHAVGFASR'	0.0292825	-
YWHAQ'	C25	30	1	YDDMATCMK'	-0.0297536	Yes
YWHAQ'	C134	3	2	YLAEVACGDDRK', 'YLAEVACGDDR'	0.17945	Yes
YWHAZ'	C25	95	2	LAEQAERYDDMAACMK', 'YDDMAACMK'	0.00678191	Yes
ZC3HAV1'	C272	10	1	SCTPSPDQISHR'	0.372471	-
ZCCHC8'	C607	3	2	SEAGHASSPDSEVTSLCQK', 'KSEAGHASSPDSEVTSLCQK'	0.756059	-
ZNF598'	C864	3	1	SAWQATTQQAGLDCR'	0.01156	-
ZNF598'	C610	5	1	VGSEKPGTTLPQPPPATCPPGALQAPEAPASR'	0.110189	-
ZNF609'	C178	2	1	SEGVGTCSEKDPGVLQPVPLGGR'	0.209474	-
ZRANB2'	C71	4	1	GLFSANDWQCK'	-0.0599089	-
ZRANB2'	C15	8	1	VSDGDWICPDKK'	0.0226767	-
